# Supplementary material
Source: publisher figshare collection journal article supplement (https://brill.figshare.com/articles/dataset/_/5545159)

**BioGeoBEARS BAYAREALIKE on Dungies M0\_unconstrained**  
**ancstates: global optim, 4 areas max. d=6e-04; e=0.0183; j=0; LnL=-344.30**

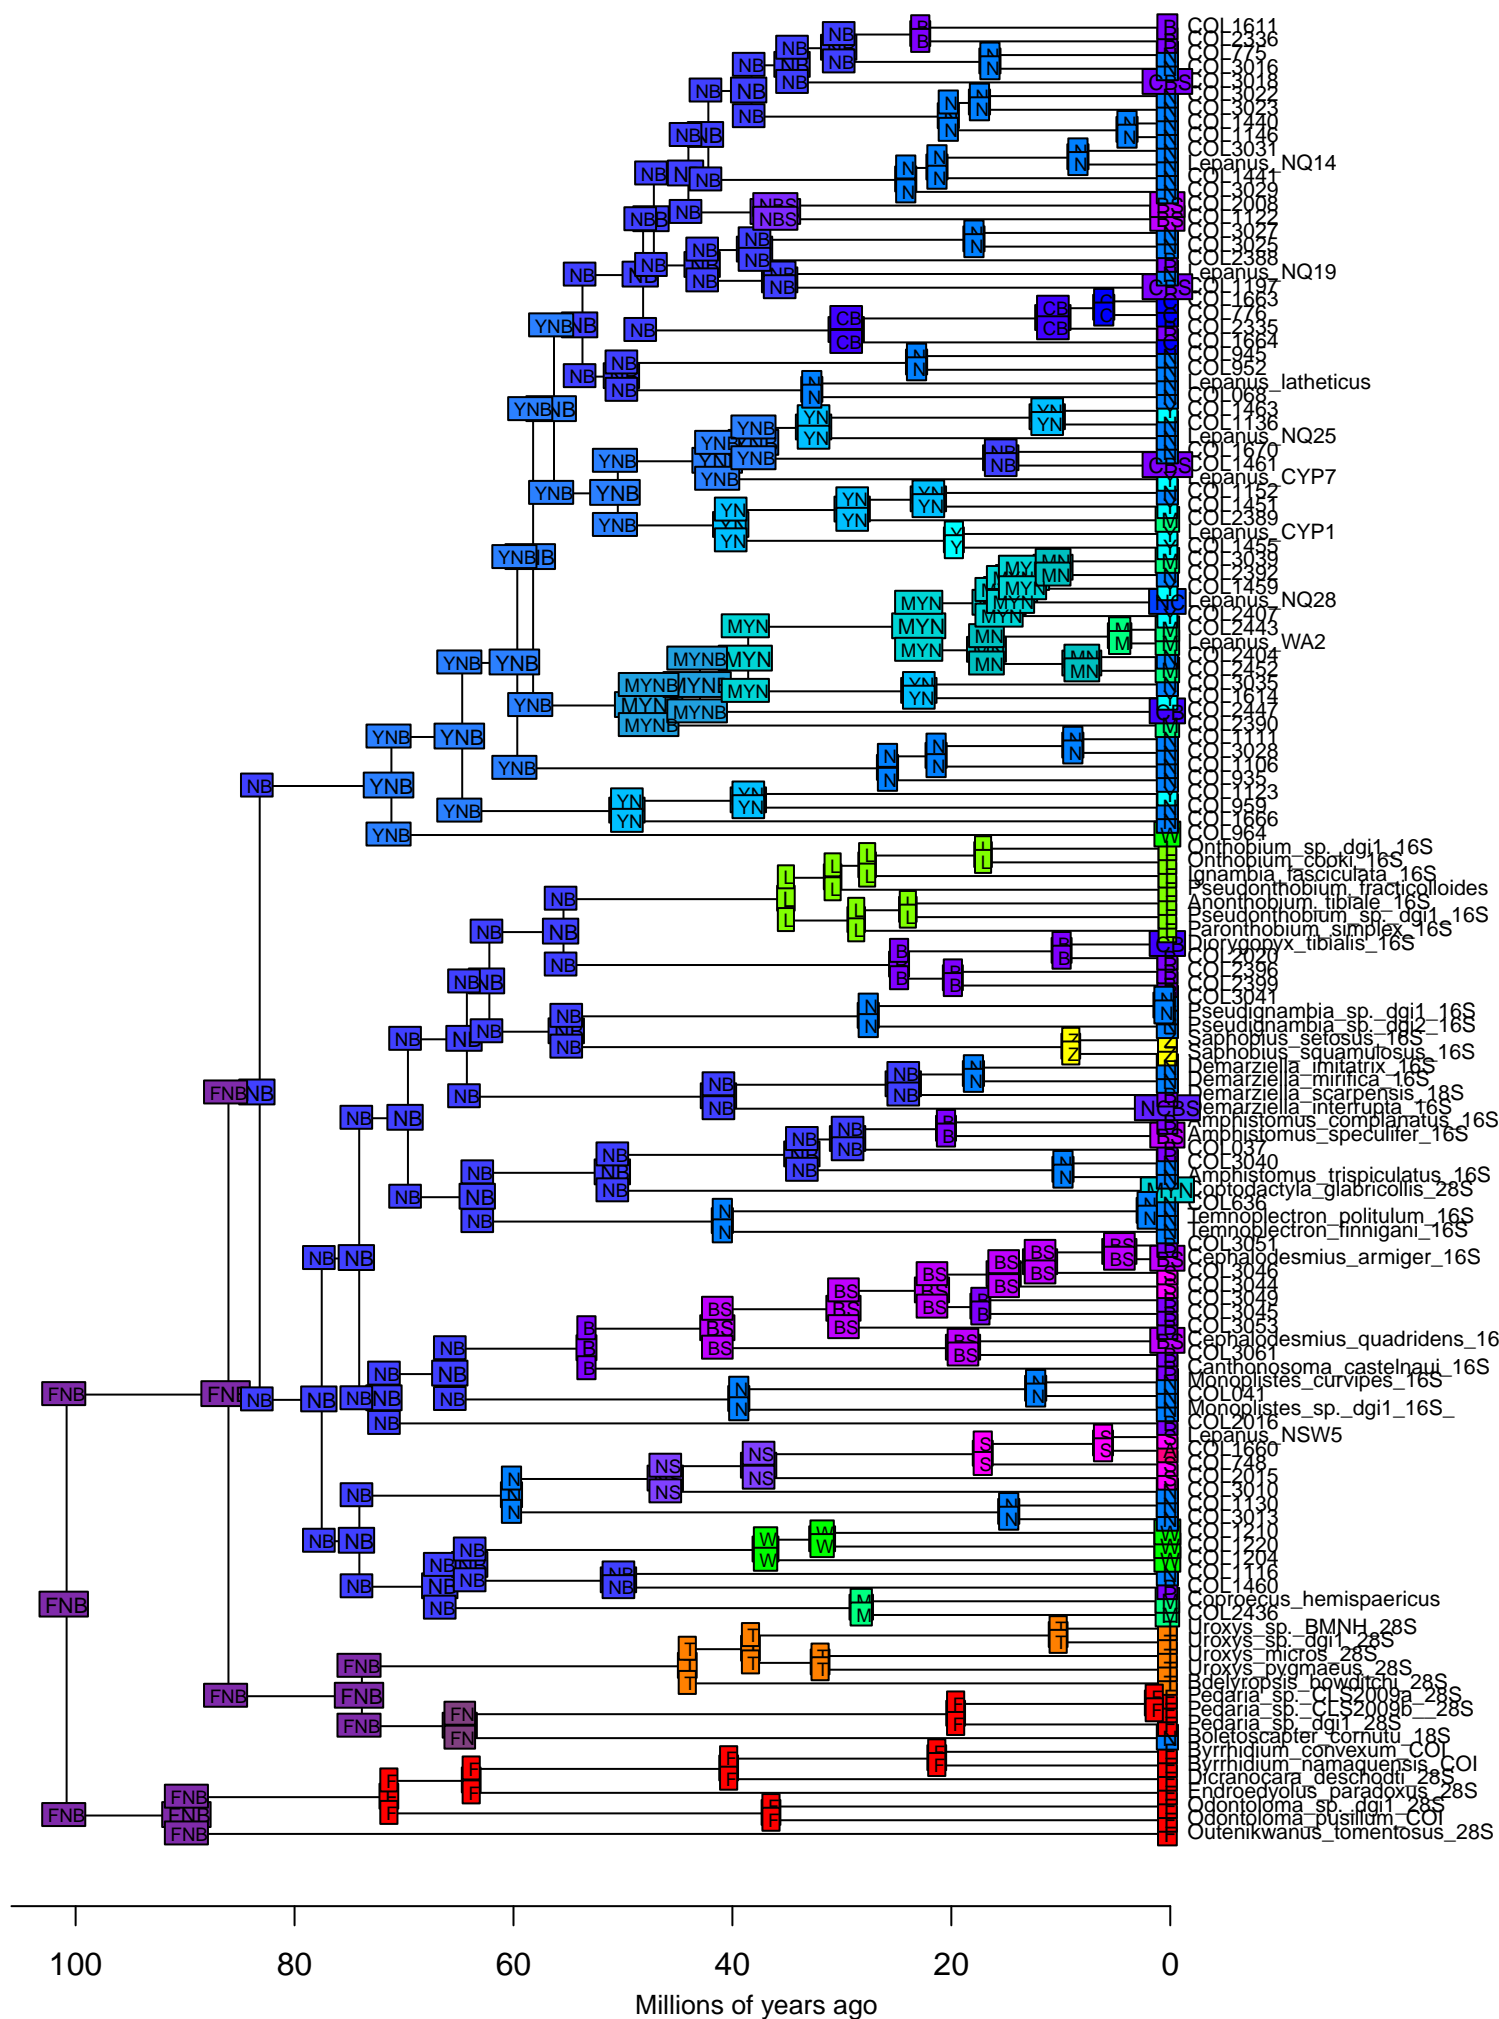

**BioGeoBEARS BAYAREALIKE on Dungies M0\_unconstrained**  
**ancstates: global optim, 4 areas max. d=6e-04; e=0.0183; j=0; LnL=-344.30**

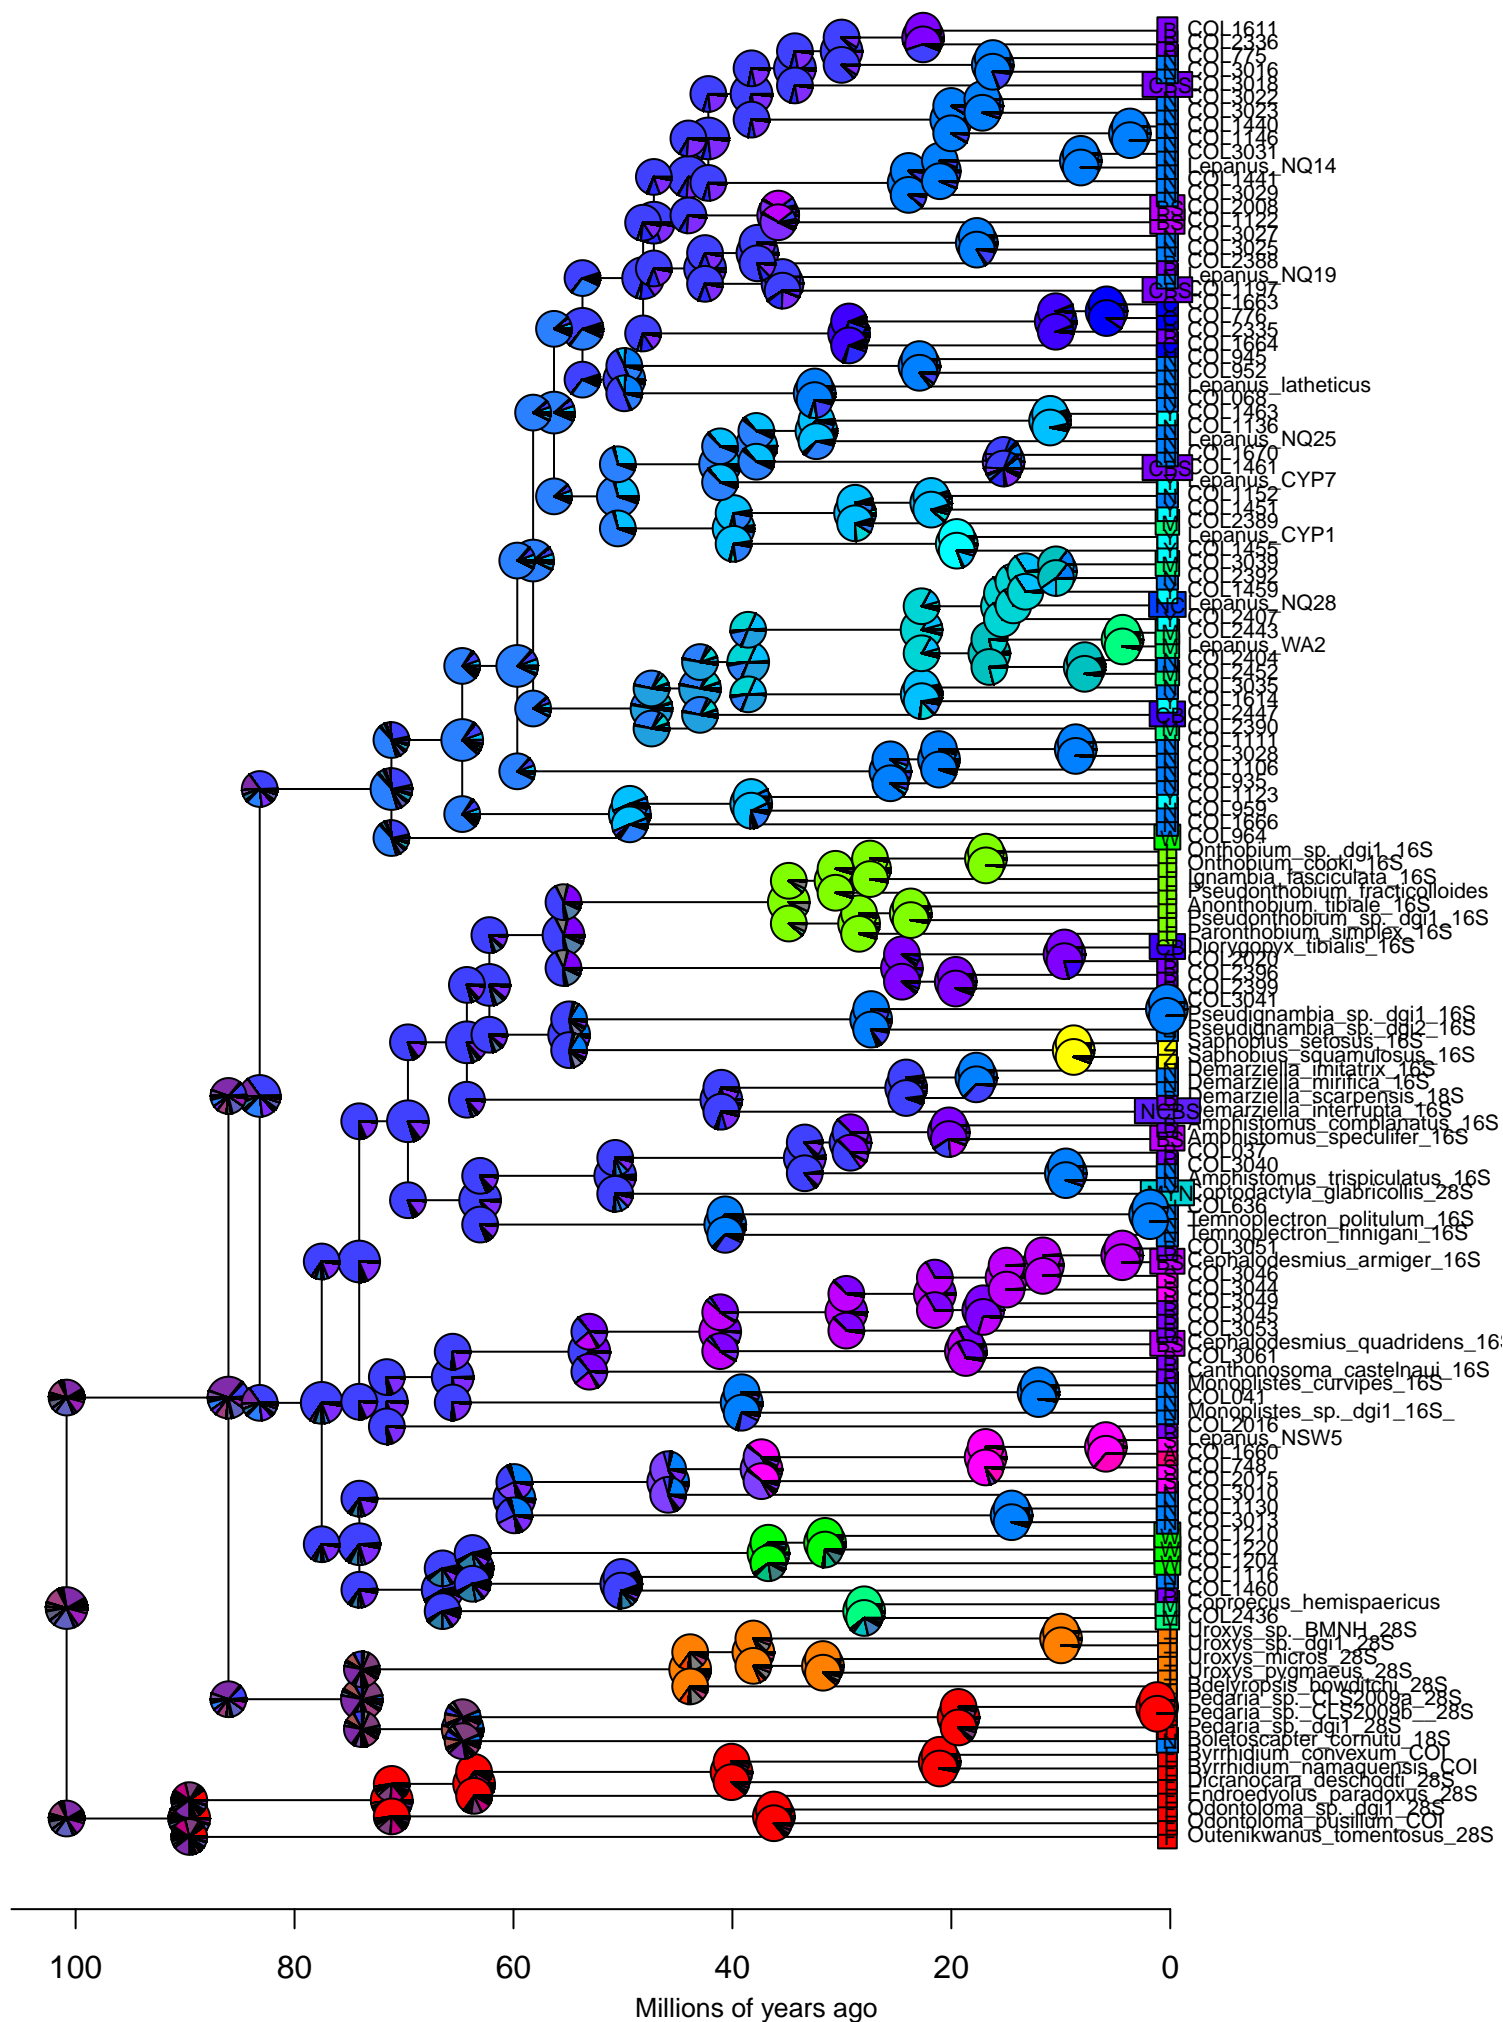

**BioGeoBEARS BAYAREALIKE+J on Dungies M0\_unconstrained**  
**ancstates: global optim, 4 areas max. d=3e-04; e=0; j=0.0142; LnL=-295.06**

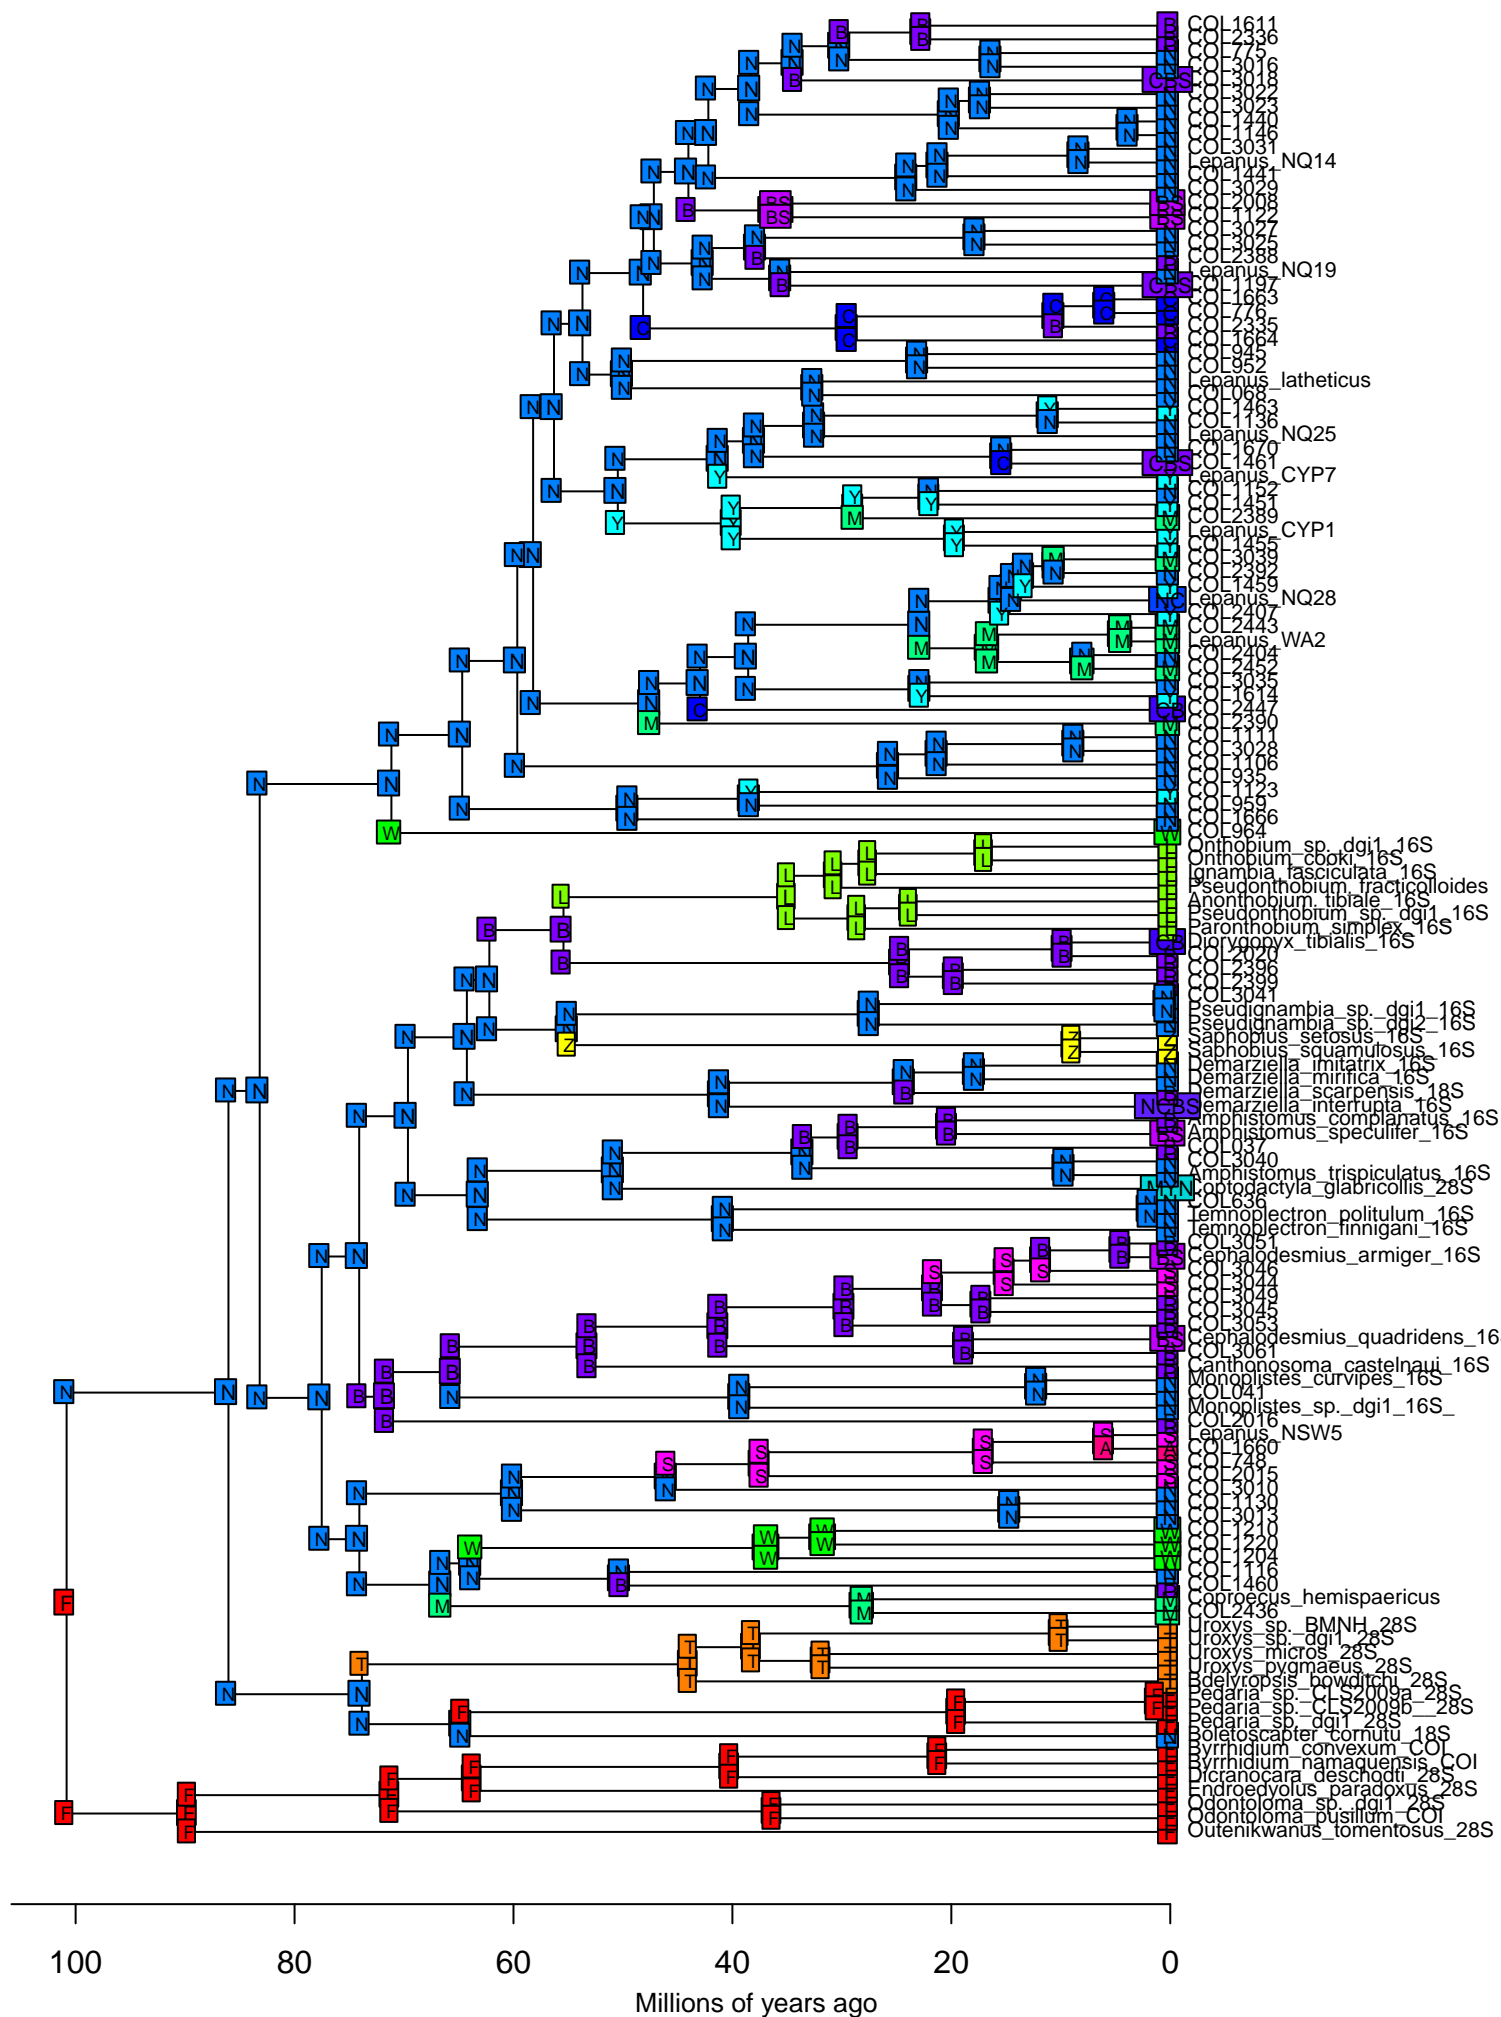

**BioGeoBEARS BAYAREALIKE+J on Dungies M0\_unconstrained**  
**ancstates: global optim, 4 areas max. d=3e-04; e=0; j=0.0142; LnL=-295.06**

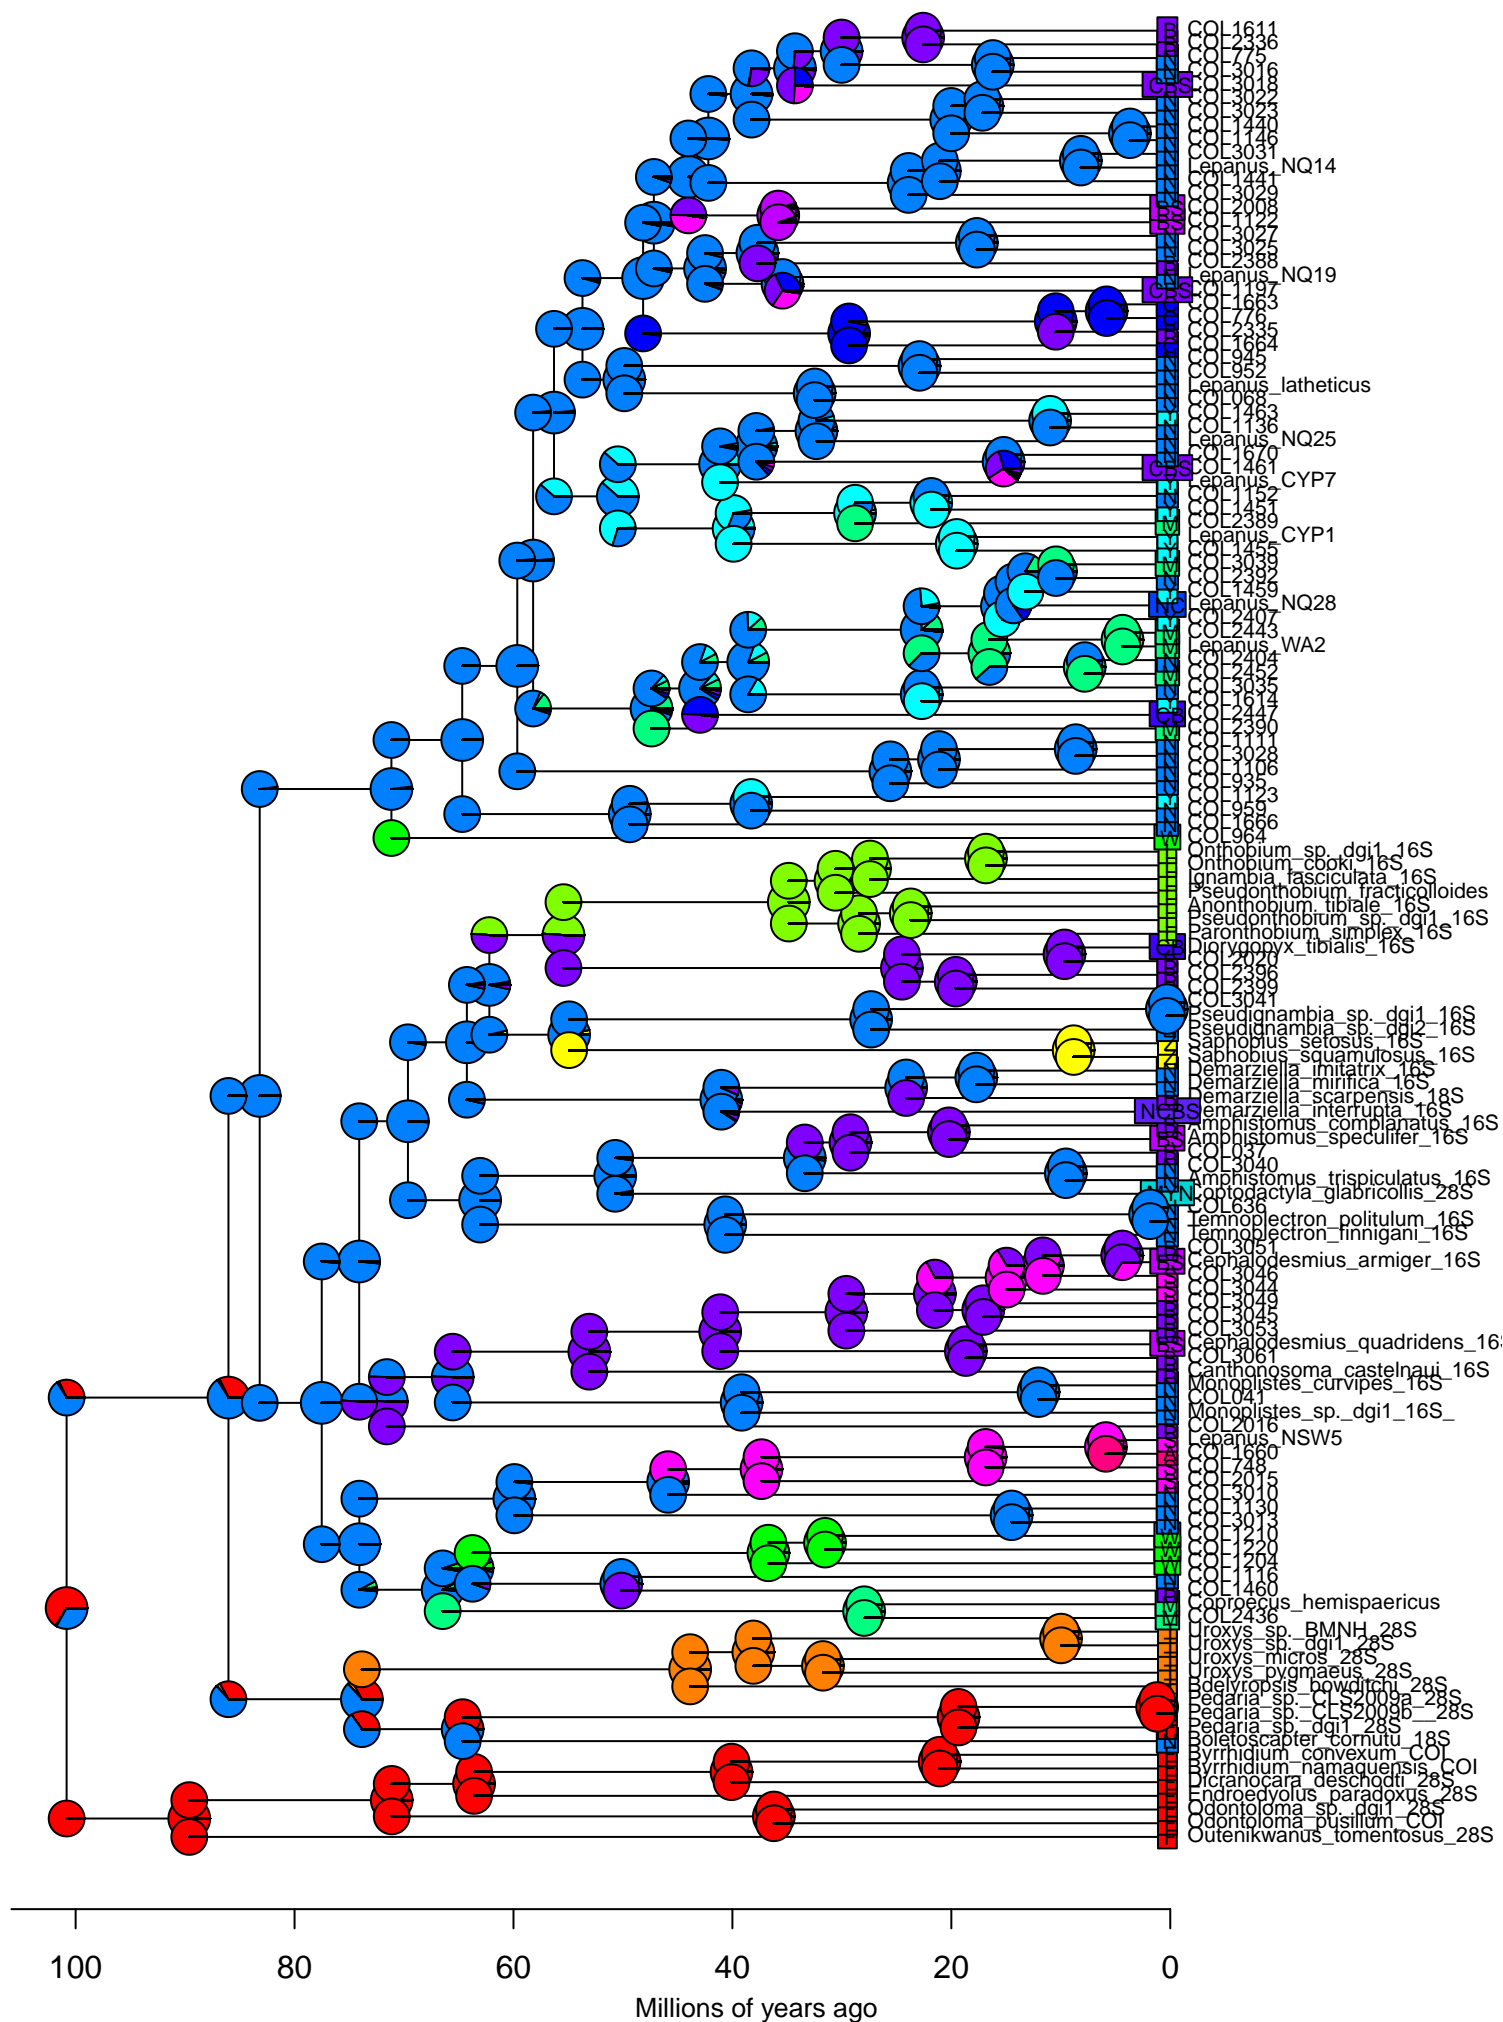

Supplement: Supplementary file 1 [file 1]
