# Supplementary material
Source: publisher figshare collection journal article supplement (https://brill.figshare.com/articles/dataset/_/5545159)
Supplement: Supplementary file 1 [file 2]

## Sheet: range_probabilities.txt
_		F	T	Z	L	W	M	Y	N	C	B	S	A	FT	FZ	FL	FW	FM	FY	FN	FC	FB	FS	FA	TZ	TL	TW	TM	TY	TN	TC	TB	TS	TA	ZL	ZW	ZM	ZY	ZN	ZC	ZB	ZS	ZA	LW	LM	LY	LN	LC	LB
1		1	0	0	0	0	0	0	0	0	0	0	0	0	0	0	0	0	0	0	0	0	0	0	0	0	0	0	0	0	0	0	0	0	0	0	0	0	0	0	0	0	0	0	0	0	0	0	0
2		1	0	0	0	0	0	0	0	0	0	0	0	0	0	0	0	0	0	0	0	0	0	0	0	0	0	0	0	0	0	0	0	0	0	0	0	0	0	0	0	0	0	0	0	0	0	0	0
3		1	0	0	0	0	0	0	0	0	0	0	0	0	0	0	0	0	0	0	0	0	0	0	0	0	0	0	0	0	0	0	0	0	0	0	0	0	0	0	0	0	0	0	0	0	0	0	0
4		1	0	0	0	0	0	0	0	0	0	0	0	0	0	0	0	0	0	0	0	0	0	0	0	0	0	0	0	0	0	0	0	0	0	0	0	0	0	0	0	0	0	0	0	0	0	0	0
5		1	0	0	0	0	0	0	0	0	0	0	0	0	0	0	0	0	0	0	0	0	0	0	0	0	0	0	0	0	0	0	0	0	0	0	0	0	0	0	0	0	0	0	0	0	0	0	0
6		1	0	0	0	0	0	0	0	0	0	0	0	0	0	0	0	0	0	0	0	0	0	0	0	0	0	0	0	0	0	0	0	0	0	0	0	0	0	0	0	0	0	0	0	0	0	0	0
7		1	0	0	0	0	0	0	0	0	0	0	0	0	0	0	0	0	0	0	0	0	0	0	0	0	0	0	0	0	0	0	0	0	0	0	0	0	0	0	0	0	0	0	0	0	0	0	0
8		0	0	0	0	0	0	0	1	0	0	0	0	0	0	0	0	0	0	0	0	0	0	0	0	0	0	0	0	0	0	0	0	0	0	0	0	0	0	0	0	0	0	0	0	0	0	0	0
9		1	0	0	0	0	0	0	0	0	0	0	0	0	0	0	0	0	0	0	0	0	0	0	0	0	0	0	0	0	0	0	0	0	0	0	0	0	0	0	0	0	0	0	0	0	0	0	0
10		1	0	0	0	0	0	0	0	0	0	0	0	0	0	0	0	0	0	0	0	0	0	0	0	0	0	0	0	0	0	0	0	0	0	0	0	0	0	0	0	0	0	0	0	0	0	0	0
11		1	0	0	0	0	0	0	0	0	0	0	0	0	0	0	0	0	0	0	0	0	0	0	0	0	0	0	0	0	0	0	0	0	0	0	0	0	0	0	0	0	0	0	0	0	0	0	0
12		0	1	0	0	0	0	0	0	0	0	0	0	0	0	0	0	0	0	0	0	0	0	0	0	0	0	0	0	0	0	0	0	0	0	0	0	0	0	0	0	0	0	0	0	0	0	0	0
13		0	1	0	0	0	0	0	0	0	0	0	0	0	0	0	0	0	0	0	0	0	0	0	0	0	0	0	0	0	0	0	0	0	0	0	0	0	0	0	0	0	0	0	0	0	0	0	0
14		0	1	0	0	0	0	0	0	0	0	0	0	0	0	0	0	0	0	0	0	0	0	0	0	0	0	0	0	0	0	0	0	0	0	0	0	0	0	0	0	0	0	0	0	0	0	0	0
15		0	1	0	0	0	0	0	0	0	0	0	0	0	0	0	0	0	0	0	0	0	0	0	0	0	0	0	0	0	0	0	0	0	0	0	0	0	0	0	0	0	0	0	0	0	0	0	0
16		0	1	0	0	0	0	0	0	0	0	0	0	0	0	0	0	0	0	0	0	0	0	0	0	0	0	0	0	0	0	0	0	0	0	0	0	0	0	0	0	0	0	0	0	0	0	0	0
17		0	0	0	0	0	1	0	0	0	0	0	0	0	0	0	0	0	0	0	0	0	0	0	0	0	0	0	0	0	0	0	0	0	0	0	0	0	0	0	0	0	0	0	0	0	0	0	0
18		0	0	0	0	0	1	0	0	0	0	0	0	0	0	0	0	0	0	0	0	0	0	0	0	0	0	0	0	0	0	0	0	0	0	0	0	0	0	0	0	0	0	0	0	0	0	0	0
19		0	0	0	0	0	0	0	0	0	1	0	0	0	0	0	0	0	0	0	0	0	0	0	0	0	0	0	0	0	0	0	0	0	0	0	0	0	0	0	0	0	0	0	0	0	0	0	0
20		0	0	0	0	0	0	0	1	0	0	0	0	0	0	0	0	0	0	0	0	0	0	0	0	0	0	0	0	0	0	0	0	0	0	0	0	0	0	0	0	0	0	0	0	0	0	0	0
21		0	0	0	0	1	0	0	0	0	0	0	0	0	0	0	0	0	0	0	0	0	0	0	0	0	0	0	0	0	0	0	0	0	0	0	0	0	0	0	0	0	0	0	0	0	0	0	0
22		0	0	0	0	1	0	0	0	0	0	0	0	0	0	0	0	0	0	0	0	0	0	0	0	0	0	0	0	0	0	0	0	0	0	0	0	0	0	0	0	0	0	0	0	0	0	0	0
23		0	0	0	0	1	0	0	0	0	0	0	0	0	0	0	0	0	0	0	0	0	0	0	0	0	0	0	0	0	0	0	0	0	0	0	0	0	0	0	0	0	0	0	0	0	0	0	0
24		0	0	0	0	0	0	0	1	0	0	0	0	0	0	0	0	0	0	0	0	0	0	0	0	0	0	0	0	0	0	0	0	0	0	0	0	0	0	0	0	0	0	0	0	0	0	0	0
25		0	0	0	0	0	0	0	1	0	0	0	0	0	0	0	0	0	0	0	0	0	0	0	0	0	0	0	0	0	0	0	0	0	0	0	0	0	0	0	0	0	0	0	0	0	0	0	0
26		0	0	0	0	0	0	0	1	0	0	0	0	0	0	0	0	0	0	0	0	0	0	0	0	0	0	0	0	0	0	0	0	0	0	0	0	0	0	0	0	0	0	0	0	0	0	0	0
27		0	0	0	0	0	0	0	0	0	0	1	0	0	0	0	0	0	0	0	0	0	0	0	0	0	0	0	0	0	0	0	0	0	0	0	0	0	0	0	0	0	0	0	0	0	0	0	0
28		0	0	0	0	0	0	0	0	0	0	1	0	0	0	0	0	0	0	0	0	0	0	0	0	0	0	0	0	0	0	0	0	0	0	0	0	0	0	0	0	0	0	0	0	0	0	0	0
29		0	0	0	0	0	0	0	0	0	0	0	1	0	0	0	0	0	0	0	0	0	0	0	0	0	0	0	0	0	0	0	0	0	0	0	0	0	0	0	0	0	0	0	0	0	0	0	0
30		0	0	0	0	0	0	0	0	0	0	1	0	0	0	0	0	0	0	0	0	0	0	0	0	0	0	0	0	0	0	0	0	0	0	0	0	0	0	0	0	0	0	0	0	0	0	0	0
31		0	0	0	0	0	0	0	0	0	1	0	0	0	0	0	0	0	0	0	0	0	0	0	0	0	0	0	0	0	0	0	0	0	0	0	0	0	0	0	0	0	0	0	0	0	0	0	0
32		0	0	0	0	0	0	0	1	0	0	0	0	0	0	0	0	0	0	0	0	0	0	0	0	0	0	0	0	0	0	0	0	0	0	0	0	0	0	0	0	0	0	0	0	0	0	0	0
33		0	0	0	0	0	0	0	1	0	0	0	0	0	0	0	0	0	0	0	0	0	0	0	0	0	0	0	0	0	0	0	0	0	0	0	0	0	0	0	0	0	0	0	0	0	0	0	0
34		0	0	0	0	0	0	0	1	0	0	0	0	0	0	0	0	0	0	0	0	0	0	0	0	0	0	0	0	0	0	0	0	0	0	0	0	0	0	0	0	0	0	0	0	0	0	0	0
35		0	0	0	0	0	0	0	0	0	1	0	0	0	0	0	0	0	0	0	0	0	0	0	0	0	0	0	0	0	0	0	0	0	0	0	0	0	0	0	0	0	0	0	0	0	0	0	0
36		0	0	0	0	0	0	0	0	0	1	0	0	0	0	0	0	0	0	0	0	0	0	0	0	0	0	0	0	0	0	0	0	0	0	0	0	0	0	0	0	0	0	0	0	0	0	0	0
37		0	0	0	0	0	0	0	0	0	0	0	0	0	0	0	0	0	0	0	0	0	0	0	0	0	0	0	0	0	0	0	0	0	0	0	0	0	0	0	0	0	0	0	0	0	0	0	0
38		0	0	0	0	0	0	0	0	0	1	0	0	0	0	0	0	0	0	0	0	0	0	0	0	0	0	0	0	0	0	0	0	0	0	0	0	0	0	0	0	0	0	0	0	0	0	0	0
39		0	0	0	0	0	0	0	0	0	1	0	0	0	0	0	0	0	0	0	0	0	0	0	0	0	0	0	0	0	0	0	0	0	0	0	0	0	0	0	0	0	0	0	0	0	0	0	0
40		0	0	0	0	0	0	0	0	0	1	0	0	0	0	0	0	0	0	0	0	0	0	0	0	0	0	0	0	0	0	0	0	0	0	0	0	0	0	0	0	0	0	0	0	0	0	0	0
41		0	0	0	0	0	0	0	0	0	0	1	0	0	0	0	0	0	0	0	0	0	0	0	0	0	0	0	0	0	0	0	0	0	0	0	0	0	0	0	0	0	0	0	0	0	0	0	0
42		0	0	0	0	0	0	0	0	0	0	1	0	0	0	0	0	0	0	0	0	0	0	0	0	0	0	0	0	0	0	0	0	0	0	0	0	0	0	0	0	0	0	0	0	0	0	0	0
43		0	0	0	0	0	0	0	0	0	0	0	0	0	0	0	0	0	0	0	0	0	0	0	0	0	0	0	0	0	0	0	0	0	0	0	0	0	0	0	0	0	0	0	0	0	0	0	0
44		0	0	0	0	0	0	0	0	0	1	0	0	0	0	0	0	0	0	0	0	0	0	0	0	0	0	0	0	0	0	0	0	0	0	0	0	0	0	0	0	0	0	0	0	0	0	0	0
45		0	0	0	0	0	0	0	1	0	0	0	0	0	0	0	0	0	0	0	0	0	0	0	0	0	0	0	0	0	0	0	0	0	0	0	0	0	0	0	0	0	0	0	0	0	0	0	0
46		0	0	0	0	0	0	0	1	0	0	0	0	0	0	0	0	0	0	0	0	0	0	0	0	0	0	0	0	0	0	0	0	0	0	0	0	0	0	0	0	0	0	0	0	0	0	0	0
47		0	0	0	0	0	0	0	1	0	0	0	0	0	0	0	0	0	0	0	0	0	0	0	0	0	0	0	0	0	0	0	0	0	0	0	0	0	0	0	0	0	0	0	0	0	0	0	0
48		0	0	0	0	0	0	0	0	0	0	0	0	0	0	0	0	0	0	0	0	0	0	0	0	0	0	0	0	0	0	0	0	0	0	0	0	0	0	0	0	0	0	0	0	0	0	0	0
49		0	0	0	0	0	0	0	1	0	0	0	0	0	0	0	0	0	0	0	0	0	0	0	0	0	0	0	0	0	0	0	0	0	0	0	0	0	0	0	0	0	0	0	0	0	0	0	0
50		0	0	0	0	0	0	0	1	0	0	0	0	0	0	0	0	0	0	0	0	0	0	0	0	0	0	0	0	0	0	0	0	0	0	0	0	0	0	0	0	0	0	0	0	0	0	0	0
51		0	0	0	0	0	0	0	0	0	1	0	0	0	0	0	0	0	0	0	0	0	0	0	0	0	0	0	0	0	0	0	0	0	0	0	0	0	0	0	0	0	0	0	0	0	0	0	0
52		0	0	0	0	0	0	0	0	0	0	0	0	0	0	0	0	0	0	0	0	0	0	0	0	0	0	0	0	0	0	0	0	0	0	0	0	0	0	0	0	0	0	0	0	0	0	0	0
53		0	0	0	0	0	0	0	0	0	1	0	0	0	0	0	0	0	0	0	0	0	0	0	0	0	0	0	0	0	0	0	0	0	0	0	0	0	0	0	0	0	0	0	0	0	0	0	0
54		0	0	0	0	0	0	0	0	0	0	0	0	0	0	0	0	0	0	0	0	0	0	0	0	0	0	0	0	0	0	0	0	0	0	0	0	0	0	0	0	0	0	0	0	0	0	0	0
55		0	0	0	0	0	0	0	0	0	1	0	0	0	0	0	0	0	0	0	0	0	0	0	0	0	0	0	0	0	0	0	0	0	0	0	0	0	0	0	0	0	0	0	0	0	0	0	0
56		0	0	0	0	0	0	0	1	0	0	0	0	0	0	0	0	0	0	0	0	0	0	0	0	0	0	0	0	0	0	0	0	0	0	0	0	0	0	0	0	0	0	0	0	0	0	0	0
57		0	0	0	0	0	0	0	1	0	0	0	0	0	0	0	0	0	0	0	0	0	0	0	0	0	0	0	0	0	0	0	0	0	0	0	0	0	0	0	0	0	0	0	0	0	0	0	0
58		0	0	1	0	0	0	0	0	0	0	0	0	0	0	0	0	0	0	0	0	0	0	0	0	0	0	0	0	0	0	0	0	0	0	0	0	0	0	0	0	0	0	0	0	0	0	0	0
59		0	0	1	0	0	0	0	0	0	0	0	0	0	0	0	0	0	0	0	0	0	0	0	0	0	0	0	0	0	0	0	0	0	0	0	0	0	0	0	0	0	0	0	0	0	0	0	0
60		0	0	0	0	0	0	0	1	0	0	0	0	0	0	0	0	0	0	0	0	0	0	0	0	0	0	0	0	0	0	0	0	0	0	0	0	0	0	0	0	0	0	0	0	0	0	0	0
61		0	0	0	0	0	0	0	1	0	0	0	0	0	0	0	0	0	0	0	0	0	0	0	0	0	0	0	0	0	0	0	0	0	0	0	0	0	0	0	0	0	0	0	0	0	0	0	0
62		0	0	0	0	0	0	0	1	0	0	0	0	0	0	0	0	0	0	0	0	0	0	0	0	0	0	0	0	0	0	0	0	0	0	0	0	0	0	0	0	0	0	0	0	0	0	0	0
63		0	0	0	0	0	0	0	0	0	1	0	0	0	0	0	0	0	0	0	0	0	0	0	0	0	0	0	0	0	0	0	0	0	0	0	0	0	0	0	0	0	0	0	0	0	0	0	0
64		0	0	0	0	0	0	0	0	0	1	0	0	0	0	0	0	0	0	0	0	0	0	0	0	0	0	0	0	0	0	0	0	0	0	0	0	0	0	0	0	0	0	0	0	0	0	0	0
65		0	0	0	0	0	0	0	0	0	1	0	0	0	0	0	0	0	0	0	0	0	0	0	0	0	0	0	0	0	0	0	0	0	0	0	0	0	0	0	0	0	0	0	0	0	0	0	0
66		0	0	0	0	0	0	0	0	0	0	0	0	0	0	0	0	0	0	0	0	0	0	0	0	0	0	0	0	0	0	0	0	0	0	0	0	0	0	0	0	0	0	0	0	0	0	0	0
67		0	0	0	1	0	0	0	0	0	0	0	0	0	0	0	0	0	0	0	0	0	0	0	0	0	0	0	0	0	0	0	0	0	0	0	0	0	0	0	0	0	0	0	0	0	0	0	0
68		0	0	0	1	0	0	0	0	0	0	0	0	0	0	0	0	0	0	0	0	0	0	0	0	0	0	0	0	0	0	0	0	0	0	0	0	0	0	0	0	0	0	0	0	0	0	0	0
69		0	0	0	1	0	0	0	0	0	0	0	0	0	0	0	0	0	0	0	0	0	0	0	0	0	0	0	0	0	0	0	0	0	0	0	0	0	0	0	0	0	0	0	0	0	0	0	0
70		0	0	0	1	0	0	0	0	0	0	0	0	0	0	0	0	0	0	0	0	0	0	0	0	0	0	0	0	0	0	0	0	0	0	0	0	0	0	0	0	0	0	0	0	0	0	0	0
71		0	0	0	1	0	0	0	0	0	0	0	0	0	0	0	0	0	0	0	0	0	0	0	0	0	0	0	0	0	0	0	0	0	0	0	0	0	0	0	0	0	0	0	0	0	0	0	0
72		0	0	0	1	0	0	0	0	0	0	0	0	0	0	0	0	0	0	0	0	0	0	0	0	0	0	0	0	0	0	0	0	0	0	0	0	0	0	0	0	0	0	0	0	0	0	0	0
73		0	0	0	1	0	0	0	0	0	0	0	0	0	0	0	0	0	0	0	0	0	0	0	0	0	0	0	0	0	0	0	0	0	0	0	0	0	0	0	0	0	0	0	0	0	0	0	0
74		0	0	0	0	1	0	0	0	0	0	0	0	0	0	0	0	0	0	0	0	0	0	0	0	0	0	0	0	0	0	0	0	0	0	0	0	0	0	0	0	0	0	0	0	0	0	0	0
75		0	0	0	0	0	0	0	1	0	0	0	0	0	0	0	0	0	0	0	0	0	0	0	0	0	0	0	0	0	0	0	0	0	0	0	0	0	0	0	0	0	0	0	0	0	0	0	0
76		0	0	0	0	0	0	0	1	0	0	0	0	0	0	0	0	0	0	0	0	0	0	0	0	0	0	0	0	0	0	0	0	0	0	0	0	0	0	0	0	0	0	0	0	0	0	0	0
77		0	0	0	0	0	0	1	0	0	0	0	0	0	0	0	0	0	0	0	0	0	0	0	0	0	0	0	0	0	0	0	0	0	0	0	0	0	0	0	0	0	0	0	0	0	0	0	0
78		0	0	0	0	0	0	0	1	0	0	0	0	0	0	0	0	0	0	0	0	0	0	0	0	0	0	0	0	0	0	0	0	0	0	0	0	0	0	0	0	0	0	0	0	0	0	0	0
79		0	0	0	0	0	0	0	1	0	0	0	0	0	0	0	0	0	0	0	0	0	0	0	0	0	0	0	0	0	0	0	0	0	0	0	0	0	0	0	0	0	0	0	0	0	0	0	0
80		0	0	0	0	0	0	0	1	0	0	0	0	0	0	0	0	0	0	0	0	0	0	0	0	0	0	0	0	0	0	0	0	0	0	0	0	0	0	0	0	0	0	0	0	0	0	0	0
81		0	0	0	0	0	0	0	1	0	0	0	0	0	0	0	0	0	0	0	0	0	0	0	0	0	0	0	0	0	0	0	0	0	0	0	0	0	0	0	0	0	0	0	0	0	0	0	0
82		0	0	0	0	0	1	0	0	0	0	0	0	0	0	0	0	0	0	0	0	0	0	0	0	0	0	0	0	0	0	0	0	0	0	0	0	0	0	0	0	0	0	0	0	0	0	0	0
83		0	0	0	0	0	0	0	0	0	0	0	0	0	0	0	0	0	0	0	0	0	0	0	0	0	0	0	0	0	0	0	0	0	0	0	0	0	0	0	0	0	0	0	0	0	0	0	0
84		0	0	0	0	0	0	1	0	0	0	0	0	0	0	0	0	0	0	0	0	0	0	0	0	0	0	0	0	0	0	0	0	0	0	0	0	0	0	0	0	0	0	0	0	0	0	0	0
85		0	0	0	0	0	0	0	1	0	0	0	0	0	0	0	0	0	0	0	0	0	0	0	0	0	0	0	0	0	0	0	0	0	0	0	0	0	0	0	0	0	0	0	0	0	0	0	0
86		0	0	0	0	0	1	0	0	0	0	0	0	0	0	0	0	0	0	0	0	0	0	0	0	0	0	0	0	0	0	0	0	0	0	0	0	0	0	0	0	0	0	0	0	0	0	0	0
87		0	0	0	0	0	0	0	1	0	0	0	0	0	0	0	0	0	0	0	0	0	0	0	0	0	0	0	0	0	0	0	0	0	0	0	0	0	0	0	0	0	0	0	0	0	0	0	0
88		0	0	0	0	0	1	0	0	0	0	0	0	0	0	0	0	0	0	0	0	0	0	0	0	0	0	0	0	0	0	0	0	0	0	0	0	0	0	0	0	0	0	0	0	0	0	0	0
89		0	0	0	0	0	1	0	0	0	0	0	0	0	0	0	0	0	0	0	0	0	0	0	0	0	0	0	0	0	0	0	0	0	0	0	0	0	0	0	0	0	0	0	0	0	0	0	0
90		0	0	0	0	0	0	1	0	0	0	0	0	0	0	0	0	0	0	0	0	0	0	0	0	0	0	0	0	0	0	0	0	0	0	0	0	0	0	0	0	0	0	0	0	0	0	0	0
91		0	0	0	0	0	0	0	0	0	0	0	0	0	0	0	0	0	0	0	0	0	0	0	0	0	0	0	0	0	0	0	0	0	0	0	0	0	0	0	0	0	0	0	0	0	0	0	0
92		0	0	0	0	0	0	1	0	0	0	0	0	0	0	0	0	0	0	0	0	0	0	0	0	0	0	0	0	0	0	0	0	0	0	0	0	0	0	0	0	0	0	0	0	0	0	0	0
93		0	0	0	0	0	0	0	1	0	0	0	0	0	0	0	0	0	0	0	0	0	0	0	0	0	0	0	0	0	0	0	0	0	0	0	0	0	0	0	0	0	0	0	0	0	0	0	0
94		0	0	0	0	0	1	0	0	0	0	0	0	0	0	0	0	0	0	0	0	0	0	0	0	0	0	0	0	0	0	0	0	0	0	0	0	0	0	0	0	0	0	0	0	0	0	0	0
95		0	0	0	0	0	0	1	0	0	0	0	0	0	0	0	0	0	0	0	0	0	0	0	0	0	0	0	0	0	0	0	0	0	0	0	0	0	0	0	0	0	0	0	0	0	0	0	0
96		0	0	0	0	0	0	1	0	0	0	0	0	0	0	0	0	0	0	0	0	0	0	0	0	0	0	0	0	0	0	0	0	0	0	0	0	0	0	0	0	0	0	0	0	0	0	0	0
97		0	0	0	0	0	1	0	0	0	0	0	0	0	0	0	0	0	0	0	0	0	0	0	0	0	0	0	0	0	0	0	0	0	0	0	0	0	0	0	0	0	0	0	0	0	0	0	0
98		0	0	0	0	0	0	1	0	0	0	0	0	0	0	0	0	0	0	0	0	0	0	0	0	0	0	0	0	0	0	0	0	0	0	0	0	0	0	0	0	0	0	0	0	0	0	0	0
99		0	0	0	0	0	0	0	1	0	0	0	0	0	0	0	0	0	0	0	0	0	0	0	0	0	0	0	0	0	0	0	0	0	0	0	0	0	0	0	0	0	0	0	0	0	0	0	0
100		0	0	0	0	0	0	1	0	0	0	0	0	0	0	0	0	0	0	0	0	0	0	0	0	0	0	0	0	0	0	0	0	0	0	0	0	0	0	0	0	0	0	0	0	0	0	0	0
101		0	0	0	0	0	0	0	0	0	0	0	0	0	0	0	0	0	0	0	0	0	0	0	0	0	0	0	0	0	0	0	0	0	0	0	0	0	0	0	0	0	0	0	0	0	0	0	0
102		0	0	0	0	0	0	0	1	0	0	0	0	0	0	0	0	0	0	0	0	0	0	0	0	0	0	0	0	0	0	0	0	0	0	0	0	0	0	0	0	0	0	0	0	0	0	0	0
103		0	0	0	0	0	0	0	1	0	0	0	0	0	0	0	0	0	0	0	0	0	0	0	0	0	0	0	0	0	0	0	0	0	0	0	0	0	0	0	0	0	0	0	0	0	0	0	0
104		0	0	0	0	0	0	0	1	0	0	0	0	0	0	0	0	0	0	0	0	0	0	0	0	0	0	0	0	0	0	0	0	0	0	0	0	0	0	0	0	0	0	0	0	0	0	0	0
105		0	0	0	0	0	0	1	0	0	0	0	0	0	0	0	0	0	0	0	0	0	0	0	0	0	0	0	0	0	0	0	0	0	0	0	0	0	0	0	0	0	0	0	0	0	0	0	0
106		0	0	0	0	0	0	0	1	0	0	0	0	0	0	0	0	0	0	0	0	0	0	0	0	0	0	0	0	0	0	0	0	0	0	0	0	0	0	0	0	0	0	0	0	0	0	0	0
107		0	0	0	0	0	0	0	1	0	0	0	0	0	0	0	0	0	0	0	0	0	0	0	0	0	0	0	0	0	0	0	0	0	0	0	0	0	0	0	0	0	0	0	0	0	0	0	0
108		0	0	0	0	0	0	0	1	0	0	0	0	0	0	0	0	0	0	0	0	0	0	0	0	0	0	0	0	0	0	0	0	0	0	0	0	0	0	0	0	0	0	0	0	0	0	0	0
109		0	0	0	0	0	0	0	1	0	0	0	0	0	0	0	0	0	0	0	0	0	0	0	0	0	0	0	0	0	0	0	0	0	0	0	0	0	0	0	0	0	0	0	0	0	0	0	0
110		0	0	0	0	0	0	0	0	1	0	0	0	0	0	0	0	0	0	0	0	0	0	0	0	0	0	0	0	0	0	0	0	0	0	0	0	0	0	0	0	0	0	0	0	0	0	0	0
111		0	0	0	0	0	0	0	0	0	1	0	0	0	0	0	0	0	0	0	0	0	0	0	0	0	0	0	0	0	0	0	0	0	0	0	0	0	0	0	0	0	0	0	0	0	0	0	0
112		0	0	0	0	0	0	0	0	1	0	0	0	0	0	0	0	0	0	0	0	0	0	0	0	0	0	0	0	0	0	0	0	0	0	0	0	0	0	0	0	0	0	0	0	0	0	0	0
113		0	0	0	0	0	0	0	0	1	0	0	0	0	0	0	0	0	0	0	0	0	0	0	0	0	0	0	0	0	0	0	0	0	0	0	0	0	0	0	0	0	0	0	0	0	0	0	0
114		0	0	0	0	0	0	0	0	0	0	0	0	0	0	0	0	0	0	0	0	0	0	0	0	0	0	0	0	0	0	0	0	0	0	0	0	0	0	0	0	0	0	0	0	0	0	0	0
115		0	0	0	0	0	0	0	1	0	0	0	0	0	0	0	0	0	0	0	0	0	0	0	0	0	0	0	0	0	0	0	0	0	0	0	0	0	0	0	0	0	0	0	0	0	0	0	0
116		0	0	0	0	0	0	0	0	0	1	0	0	0	0	0	0	0	0	0	0	0	0	0	0	0	0	0	0	0	0	0	0	0	0	0	0	0	0	0	0	0	0	0	0	0	0	0	0
117		0	0	0	0	0	0	0	1	0	0	0	0	0	0	0	0	0	0	0	0	0	0	0	0	0	0	0	0	0	0	0	0	0	0	0	0	0	0	0	0	0	0	0	0	0	0	0	0
118		0	0	0	0	0	0	0	1	0	0	0	0	0	0	0	0	0	0	0	0	0	0	0	0	0	0	0	0	0	0	0	0	0	0	0	0	0	0	0	0	0	0	0	0	0	0	0	0
119		0	0	0	0	0	0	0	0	0	0	0	0	0	0	0	0	0	0	0	0	0	0	0	0	0	0	0	0	0	0	0	0	0	0	0	0	0	0	0	0	0	0	0	0	0	0	0	0
120		0	0	0	0	0	0	0	0	0	0	0	0	0	0	0	0	0	0	0	0	0	0	0	0	0	0	0	0	0	0	0	0	0	0	0	0	0	0	0	0	0	0	0	0	0	0	0	0
121		0	0	0	0	0	0	0	1	0	0	0	0	0	0	0	0	0	0	0	0	0	0	0	0	0	0	0	0	0	0	0	0	0	0	0	0	0	0	0	0	0	0	0	0	0	0	0	0
122		0	0	0	0	0	0	0	1	0	0	0	0	0	0	0	0	0	0	0	0	0	0	0	0	0	0	0	0	0	0	0	0	0	0	0	0	0	0	0	0	0	0	0	0	0	0	0	0
123		0	0	0	0	0	0	0	1	0	0	0	0	0	0	0	0	0	0	0	0	0	0	0	0	0	0	0	0	0	0	0	0	0	0	0	0	0	0	0	0	0	0	0	0	0	0	0	0
124		0	0	0	0	0	0	0	1	0	0	0	0	0	0	0	0	0	0	0	0	0	0	0	0	0	0	0	0	0	0	0	0	0	0	0	0	0	0	0	0	0	0	0	0	0	0	0	0
125		0	0	0	0	0	0	0	1	0	0	0	0	0	0	0	0	0	0	0	0	0	0	0	0	0	0	0	0	0	0	0	0	0	0	0	0	0	0	0	0	0	0	0	0	0	0	0	0
126		0	0	0	0	0	0	0	1	0	0	0	0	0	0	0	0	0	0	0	0	0	0	0	0	0	0	0	0	0	0	0	0	0	0	0	0	0	0	0	0	0	0	0	0	0	0	0	0
127		0	0	0	0	0	0	0	1	0	0	0	0	0	0	0	0	0	0	0	0	0	0	0	0	0	0	0	0	0	0	0	0	0	0	0	0	0	0	0	0	0	0	0	0	0	0	0	0
128		0	0	0	0	0	0	0	1	0	0	0	0	0	0	0	0	0	0	0	0	0	0	0	0	0	0	0	0	0	0	0	0	0	0	0	0	0	0	0	0	0	0	0	0	0	0	0	0
129		0	0	0	0	0	0	0	0	0	0	0	0	0	0	0	0	0	0	0	0	0	0	0	0	0	0	0	0	0	0	0	0	0	0	0	0	0	0	0	0	0	0	0	0	0	0	0	0
130		0	0	0	0	0	0	0	1	0	0	0	0	0	0	0	0	0	0	0	0	0	0	0	0	0	0	0	0	0	0	0	0	0	0	0	0	0	0	0	0	0	0	0	0	0	0	0	0
131		0	0	0	0	0	0	0	1	0	0	0	0	0	0	0	0	0	0	0	0	0	0	0	0	0	0	0	0	0	0	0	0	0	0	0	0	0	0	0	0	0	0	0	0	0	0	0	0
132		0	0	0	0	0	0	0	0	0	1	0	0	0	0	0	0	0	0	0	0	0	0	0	0	0	0	0	0	0	0	0	0	0	0	0	0	0	0	0	0	0	0	0	0	0	0	0	0
133		0	0	0	0	0	0	0	0	0	1	0	0	0	0	0	0	0	0	0	0	0	0	0	0	0	0	0	0	0	0	0	0	0	0	0	0	0	0	0	0	0	0	0	0	0	0	0	0
134		0.0204345	0.000435931	3.63752e-08	5.32799e-08	4.35271e-05	2.11504e-06	7.89431e-07	0.0088364	2.71946e-07	2.2555e-05	5.15342e-07	2.04765e-09	0.0195391	1.02181e-06	1.47085e-06	0.00142135	5.80193e-05	2.24714e-05	0.203252	7.71827e-06	0.000613012	1.4134e-05	5.49642e-08	1.9349e-08	2.74538e-08	2.97288e-05	1.07586e-06	4.29223e-07	0.00525572	1.47346e-07	1.12745e-05	2.62324e-07	1.00115e-09	3.05208e-09	5.73217e-09	3.65243e-10	8.91746e-11	1.21475e-06	4.54674e-09	1.30812e-07	4.21183e-09	1.58581e-13	7.8455e-09	4.53239e-10	1.01997e-10	1.77948e-06	6.41491e-09	1.41638e-07
135		1	3.18047e-14	2.32204e-14	2.32257e-14	2.56545e-14	2.37196e-14	2.3495e-14	4.55711e-14	2.35724e-14	2.51812e-14	2.35597e-14	2.31832e-14	1.79266e-12	1.70116e-12	1.70118e-12	1.71618e-12	1.7033e-12	1.70228e-12	2.98913e-12	1.7025e-12	1.71155e-12	1.70249e-12	1.70101e-12	7.29275e-26	7.29284e-26	7.35546e-26	7.30172e-26	7.29746e-26	1.26669e-25	7.29838e-26	7.33614e-26	7.29832e-26	7.29215e-26	6.91103e-26	6.97364e-26	6.91991e-26	6.91565e-26	1.22851e-25	6.91657e-26	6.95433e-26	6.91651e-26	6.91034e-26	6.97374e-26	6.92e-26	6.91575e-26	1.22852e-25	6.91666e-26	6.95443e-26
136		1	4.81367e-16	4.25946e-16	4.25978e-16	4.40771e-16	4.28911e-16	4.27573e-16	6.55807e-16	4.28023e-16	4.37749e-16	4.27951e-16	4.25727e-16	3.61996e-13	3.48941e-13	3.48945e-13	3.51157e-13	3.49269e-13	3.49114e-13	5.25792e-13	3.49149e-13	3.50494e-13	3.49146e-13	3.48919e-13	1.13673e-27	1.13674e-27	1.14073e-27	1.13731e-27	1.13704e-27	1.46897e-27	1.1371e-27	1.13952e-27	1.13709e-27	1.13669e-27	1.11273e-27	1.11672e-27	1.1133e-27	1.11303e-27	1.44496e-27	1.11309e-27	1.11551e-27	1.11308e-27	1.11268e-27	1.11673e-27	1.11331e-27	1.11303e-27	1.44496e-27	1.11309e-27	1.11551e-27
137		1	2.00666e-16	1.98217e-16	1.98218e-16	1.98722e-16	1.98304e-16	1.98264e-16	2.2277e-16	1.98276e-16	1.98594e-16	1.98274e-16	1.98211e-16	2.62901e-13	2.60516e-13	2.60516e-13	2.60923e-13	2.60576e-13	2.60548e-13	2.92635e-13	2.60554e-13	2.60801e-13	2.60554e-13	2.60512e-13	1.78062e-28	1.78063e-28	1.78327e-28	1.78095e-28	1.78079e-28	2.07367e-28	1.78081e-28	1.78235e-28	1.78081e-28	1.7806e-28	1.76231e-28	1.76495e-28	1.76263e-28	1.76247e-28	2.05535e-28	1.7625e-28	1.76404e-28	1.7625e-28	1.76229e-28	1.76495e-28	1.76263e-28	1.76248e-28	2.05536e-28	1.7625e-28	1.76404e-28
138		1	3.96477e-16	3.91637e-16	3.91639e-16	3.92636e-16	3.9181e-16	3.91731e-16	4.4015e-16	3.91754e-16	3.92384e-16	3.9175e-16	3.91625e-16	1.58337e-13	1.54815e-13	1.54816e-13	1.55413e-13	1.54903e-13	1.54862e-13	2.02463e-13	1.54871e-13	1.55234e-13	1.5487e-13	1.54809e-13	3.44695e-28	3.44695e-28	3.4526e-28	3.44748e-28	3.44721e-28	4.26758e-28	3.44721e-28	3.45036e-28	3.44723e-28	3.44692e-28	3.4013e-28	3.40694e-28	3.40183e-28	3.40155e-28	4.22192e-28	3.40156e-28	3.4047e-28	3.40157e-28	3.40127e-28	3.40695e-28	3.40183e-28	3.40156e-28	4.22193e-28	3.40156e-28	3.40471e-28
139		1	1.49234e-16	1.48907e-16	1.48907e-16	1.48964e-16	1.48916e-16	1.48911e-16	1.53197e-16	1.48912e-16	1.48947e-16	1.48912e-16	1.48906e-16	1.49788e-13	1.49295e-13	1.49295e-13	1.49379e-13	1.49308e-13	1.49302e-13	1.55954e-13	1.49303e-13	1.49354e-13	1.49303e-13	1.49295e-13	5.54306e-29	5.54306e-29	5.54554e-29	5.54334e-29	5.5432e-29	5.85416e-29	5.54321e-29	5.54463e-29	5.54322e-29	5.54305e-29	5.52468e-29	5.52715e-29	5.52495e-29	5.52482e-29	5.83578e-29	5.52483e-29	5.52625e-29	5.52483e-29	5.52466e-29	5.52716e-29	5.52496e-29	5.52482e-29	5.83578e-29	5.52483e-29	5.52625e-29
140		1	5.96927e-17	5.96678e-17	5.96678e-17	5.9672e-17	5.96684e-17	5.96681e-17	6.00045e-17	5.96682e-17	5.96707e-17	5.96682e-17	5.96677e-17	8.52085e-14	8.51446e-14	8.51446e-14	8.51554e-14	8.51462e-14	8.51454e-14	8.60087e-14	8.51456e-14	8.51522e-14	8.51456e-14	8.51445e-14	9.57078e-30	9.57078e-30	9.57178e-30	9.57091e-30	9.57084e-30	9.67694e-30	9.57085e-30	9.57144e-30	9.57085e-30	9.57077e-30	9.56399e-30	9.565e-30	9.56412e-30	9.56406e-30	9.67015e-30	9.56407e-30	9.56466e-30	9.56407e-30	9.56398e-30	9.565e-30	9.56412e-30	9.56406e-30	9.67015e-30	9.56407e-30	9.56466e-30
141		0.00839829	0.00418733	3.71678e-08	5.50307e-08	0.000187552	2.97903e-06	1.30729e-06	0.124988	2.90432e-07	3.33399e-05	5.59063e-07	2.30705e-09	0.00461348	9.9214e-08	1.46896e-07	0.000500642	7.9521e-06	3.48961e-06	0.0851378	7.75265e-07	8.8996e-05	1.49234e-06	6.15834e-09	1.0355e-07	1.53317e-07	0.000522524	8.29966e-06	3.64213e-06	0.15952	8.09149e-07	9.28858e-05	1.55756e-06	6.42751e-09	1.9628e-09	1.15246e-08	3.15083e-10	9.31958e-11	3.33266e-05	2.47787e-09	1.08505e-07	2.26977e-09	1.30486e-13	1.60123e-08	3.94608e-10	1.15932e-10	5.03906e-05	3.40545e-09	1.16306e-07
142		0.070981	0.0742104	7.69108e-14	7.69872e-14	1.37653e-13	8.57175e-14	8.26741e-14	0.179042	8.14481e-14	1.2161e-13	8.16555e-14	7.63539e-14	0.0764245	6.7667e-14	6.76692e-14	7.27848e-14	6.79474e-14	6.7838e-14	0.0526803	6.77874e-14	6.94401e-14	6.77978e-14	6.76521e-14	1.59369e-13	1.59376e-13	1.69252e-13	1.60156e-13	1.59867e-13	0.143471	1.59741e-13	1.63854e-13	1.59765e-13	1.59323e-13	1.8736e-25	1.98968e-25	1.88278e-25	1.87938e-25	1.24439e-13	1.8779e-25	1.92624e-25	1.87818e-25	1.87299e-25	1.98975e-25	1.88286e-25	1.87946e-25	1.24441e-13	1.87798e-25	1.92632e-25
143		0.176572	2.63382e-12	1.62121e-13	1.6217e-13	2.02883e-13	1.67747e-13	1.65795e-13	0.344145	1.65005e-13	1.90889e-13	1.6514e-13	1.61767e-13	1.59204e-12	4.9564e-13	4.95644e-13	5.04564e-13	4.96155e-13	4.95956e-13	0.479284	4.95864e-13	4.98843e-13	4.95883e-13	4.95612e-13	2.46295e-24	2.46304e-24	2.60066e-24	2.47419e-24	2.47007e-24	2.70166e-12	2.46828e-24	2.52661e-24	2.46862e-24	2.46229e-24	1.87295e-25	2.1434e-25	1.88464e-25	1.87983e-25	5.37131e-13	1.8775e-25	1.95347e-25	1.878e-25	1.87228e-25	2.1435e-25	1.88474e-25	1.87992e-25	5.37135e-13	1.87759e-25	1.95356e-25
144		1	1.01138e-14	1.99902e-15	1.99912e-15	2.09618e-15	2.01051e-15	2.00647e-15	4.81517e-14	2.0048e-15	2.05932e-15	2.0051e-15	1.99831e-15	2.26845e-12	1.13535e-12	1.13535e-12	1.15912e-12	1.1363e-12	1.1359e-12	6.04637e-12	1.13571e-12	1.14208e-12	1.13575e-12	1.1353e-12	5.01808e-27	5.01811e-27	5.10678e-27	5.02215e-27	5.0205e-27	4.12452e-26	5.01972e-27	5.0454e-27	5.01989e-27	5.01787e-27	9.64987e-28	9.89551e-28	9.66924e-28	9.66206e-28	1.38907e-26	9.65893e-28	9.76109e-28	9.65952e-28	9.64857e-28	9.89567e-28	9.66941e-28	9.66222e-28	1.38907e-26	9.6591e-28	9.76125e-28
145		1	1.49652e-18	6.18169e-19	6.18178e-19	6.31423e-19	6.19238e-19	6.18846e-19	5.2022e-18	6.18676e-19	6.24244e-19	6.18708e-19	6.18106e-19	3.42536e-14	1.89098e-14	1.89099e-14	1.92297e-14	1.89228e-14	1.89174e-14	8.56971e-14	1.89148e-14	1.90013e-14	1.89153e-14	1.89091e-14	6.58941e-32	6.58943e-32	6.70418e-32	6.59202e-32	6.59074e-32	1.94211e-31	6.59003e-32	6.61326e-32	6.5902e-32	6.58934e-32	1.23349e-32	1.25209e-32	1.23437e-32	1.23401e-32	1.06256e-31	1.23384e-32	1.23934e-32	1.23388e-32	1.23344e-32	1.2521e-32	1.23437e-32	1.23402e-32	1.06256e-31	1.23385e-32	1.23935e-32
146		5.26647e-14	1	6.90664e-15	6.90718e-15	7.39882e-15	6.97026e-15	6.94807e-15	9.56016e-14	6.93901e-15	7.23544e-15	6.94058e-15	6.90266e-15	2.47775e-12	2.4243e-26	2.42434e-26	2.50151e-26	2.42917e-26	2.42731e-26	8.69708e-26	2.42648e-26	2.45379e-26	2.42664e-26	2.42403e-26	8.65475e-13	8.65488e-13	8.85739e-13	8.67046e-13	8.66466e-13	4.11925e-12	8.66214e-13	8.74485e-13	8.66262e-13	8.65384e-13	8.46813e-27	8.66625e-27	8.48338e-27	8.4777e-27	4.0302e-26	8.47523e-27	8.55615e-27	8.4757e-27	8.46712e-27	8.66638e-27	8.4835e-27	8.47783e-27	4.03024e-26	8.47536e-27	8.55628e-27
147		8.21046e-16	1	2.11909e-16	2.11916e-16	2.18677e-16	2.12706e-16	2.12426e-16	1.40216e-15	2.1231e-16	2.16095e-16	2.1233e-16	2.11859e-16	4.90001e-13	3.58288e-28	3.5829e-28	3.64487e-28	3.5852e-28	3.58422e-28	7.24905e-28	3.58373e-28	3.59972e-28	3.58384e-28	3.58277e-28	1.86757e-13	1.86759e-13	1.90563e-13	1.87053e-13	1.86944e-13	7.98515e-13	1.86896e-13	1.88456e-13	1.86905e-13	1.86739e-13	7.21073e-29	7.56457e-29	7.22206e-29	7.21704e-29	4.42863e-28	7.21445e-29	7.29879e-29	7.21504e-29	7.21017e-29	7.56466e-29	7.22214e-29	7.21712e-29	4.42865e-28	7.21453e-29	7.29888e-29
148		2.03702e-16	1	1.46626e-16	1.46626e-16	1.47318e-16	1.46687e-16	1.46665e-16	2.60719e-16	1.46655e-16	1.46967e-16	1.46657e-16	1.46622e-16	1.59711e-13	7.4658e-29	7.46582e-29	7.56535e-29	7.46875e-29	7.46742e-29	1.27678e-28	7.46672e-29	7.48947e-29	7.46689e-29	7.46569e-29	8.14794e-14	8.14801e-14	8.24612e-14	8.1556e-14	8.15278e-14	2.39297e-13	8.15154e-14	8.19179e-14	8.15178e-14	8.1475e-14	2.2161e-29	2.28134e-29	2.21778e-29	2.21698e-29	8.64966e-29	2.21655e-29	2.23054e-29	2.21666e-29	2.21603e-29	2.28135e-29	2.21779e-29	2.217e-29	8.64968e-29	2.21657e-29	2.23055e-29
149		2.06735e-17	1	1.48808e-17	1.48809e-17	1.49511e-17	1.48871e-17	1.48848e-17	2.646e-17	1.48838e-17	1.49154e-17	1.4884e-17	1.48805e-17	8.46351e-14	3.37323e-30	3.37324e-30	3.40308e-30	3.37427e-30	3.37382e-30	5.25664e-30	3.37359e-30	3.38099e-30	3.37364e-30	3.37318e-30	6.07761e-14	6.07763e-14	6.10754e-14	6.07995e-14	6.07909e-14	1.08902e-13	6.07871e-14	6.091e-14	6.07878e-14	6.07748e-14	1.72091e-30	1.74137e-30	1.7216e-30	1.72129e-30	3.91369e-30	1.72114e-30	1.72615e-30	1.72118e-30	1.72087e-30	1.74138e-30	1.7216e-30	1.7213e-30	3.9137e-30	1.72115e-30	1.72615e-30
150	Australasian	2.78662e-14	2.23542e-14	6.68433e-07	9.48233e-07	0.00952652	8.0737e-05	4.39183e-05	0.818883	5.97761e-06	0.000944897	1.04086e-05	4.28911e-08	2.07481e-26	7.65876e-19	1.01674e-18	5.73753e-15	7.80739e-17	3.99299e-17	5.24702e-13	6.52757e-18	8.34831e-16	1.17746e-17	5.12426e-20	6.38767e-19	8.47994e-19	4.78529e-15	6.51163e-17	3.33029e-17	3.82556e-13	5.44422e-18	6.96277e-16	9.8204e-18	4.27381e-20	5.85169e-09	2.08012e-07	2.71199e-09	1.02129e-09	7.30981e-05	7.00475e-09	3.99177e-07	6.44605e-09	8.98188e-13	2.8805e-07	3.2275e-09	1.38332e-09	0.000112	9.4912e-09	4.10155e-07
151		5.56533e-16	4.5569e-16	7.40522e-07	9.00516e-07	0.00066915	0.000158282	8.53979e-07	0.890585	2.24202e-06	0.00238037	1.24719e-05	5.12153e-08	1.58999e-28	2.43184e-19	2.7963e-19	4.18407e-17	3.75869e-17	2.9597e-19	8.76628e-14	9.85432e-19	7.20152e-16	5.54404e-18	2.71146e-20	1.9909e-19	2.28928e-19	3.58946e-17	3.07853e-17	2.42628e-19	6.85754e-14	8.06851e-19	5.89618e-16	4.53882e-18	2.21982e-20	3.80302e-09	2.95966e-08	1.84557e-08	1.86546e-10	9.20966e-05	3.55145e-09	1.08772e-06	4.87885e-09	6.10548e-12	3.59911e-08	2.21508e-08	1.59362e-10	0.000150109	4.3528e-09	9.04002e-07
152	Western	3.44335e-15	2.7088e-15	2.21768e-15	2.22641e-15	0.00164871	0.00175802	2.23391e-15	0.969975	2.56215e-15	0.00266074	0.000122638	4.95008e-07	8.6349e-28	5.84239e-28	5.84509e-28	1.94635e-16	2.60138e-16	5.86611e-28	5.63856e-14	5.9149e-28	1.60025e-16	3.41244e-17	1.98141e-19	3.65248e-28	3.65507e-28	1.53548e-16	1.6272e-16	3.67643e-28	4.69383e-14	3.724e-28	1.31354e-16	2.14816e-17	1.23695e-19	2.23474e-28	8.95912e-17	9.94446e-17	2.24724e-28	3.66718e-14	2.29892e-28	7.99715e-17	1.32644e-17	7.54973e-20	8.96556e-17	9.95372e-17	2.24933e-28	3.6676e-14	2.301e-28	7.99909e-17
153		5.64131e-14	5.52255e-14	5.41923e-14	5.41985e-14	0.0321099	0.0617273	5.42102e-14	0.826898	5.44296e-14	0.0179788	6.24552e-14	5.4212e-14	9.96516e-27	8.77977e-27	8.78038e-27	3.0113e-15	8.14071e-15	8.78802e-27	3.01361e-14	8.79703e-27	1.47586e-15	9.44152e-27	8.7805e-27	7.7359e-27	7.73648e-27	2.67203e-15	7.17289e-15	7.74356e-27	2.87545e-14	7.7528e-27	1.29964e-15	8.33134e-27	7.73649e-27	6.98582e-27	2.28331e-15	6.47638e-15	6.99012e-27	2.72565e-14	7.00125e-27	1.1085e-15	7.53146e-27	6.98609e-27	2.28348e-15	6.47683e-15	6.9906e-27	2.72571e-14	7.00174e-27	1.10856e-15
154		5.30931e-15	5.24398e-15	5.20791e-15	5.20796e-15	1.74402e-14	1	5.2082e-15	2.65204e-13	5.20951e-15	1.13331e-14	5.26135e-15	5.20801e-15	2.09457e-27	2.0698e-27	2.06981e-27	4.66594e-27	3.42876e-13	2.06995e-27	5.49808e-26	2.07016e-27	3.39274e-27	2.08177e-27	2.06981e-27	2.04124e-27	2.04125e-27	4.61323e-27	3.38143e-13	2.04135e-27	5.48202e-26	2.04158e-27	3.34426e-27	2.05256e-27	2.04125e-27	2.02802e-27	4.56641e-27	3.35951e-13	2.0281e-27	5.46521e-26	2.02835e-27	3.30996e-27	2.0391e-27	2.02803e-27	4.56643e-27	3.35952e-13	2.02811e-27	5.46521e-26	2.02836e-27	3.30998e-27
155		5.44064e-14	5.3528e-14	5.28124e-14	5.28154e-14	0.0650096	1.45774e-12	5.28222e-14	0.867219	5.29282e-14	0.0344561	5.68428e-14	5.28218e-14	5.41369e-27	4.39409e-27	4.39436e-27	5.16135e-15	8.35099e-26	4.39977e-27	2.20168e-14	4.4001e-27	1.9144e-15	4.60057e-27	4.39396e-27	3.44706e-27	3.44722e-27	3.58131e-15	7.7304e-26	3.4491e-27	2.06743e-14	3.45185e-27	1.31866e-15	3.61274e-27	3.44725e-27	3.22817e-27	3.2259e-15	7.2836e-26	3.22928e-27	1.95607e-14	3.23256e-27	1.18494e-15	3.38343e-27	3.22828e-27	3.22605e-15	7.2839e-26	3.22941e-27	1.9561e-14	3.23269e-27	1.18498e-15
156		5.93347e-14	5.82891e-14	5.77798e-14	5.77815e-14	1.64908e-12	8.26812e-13	5.77855e-14	0.867354	5.78428e-14	0.0642966	5.99713e-14	5.77849e-14	1.75409e-26	1.70907e-26	1.7091e-26	2.80567e-25	1.4434e-25	1.7093e-26	9.04507e-14	1.71007e-26	1.16852e-14	1.74418e-26	1.70913e-26	1.65436e-26	1.65438e-26	2.66033e-25	1.36445e-25	1.65448e-26	8.61978e-14	1.65531e-26	1.1097e-14	1.68755e-26	1.65443e-26	1.64022e-26	2.62727e-25	1.34677e-25	1.6403e-26	8.50673e-14	1.64114e-26	1.09633e-14	1.673e-26	1.64027e-26	2.62728e-25	1.34677e-25	1.64033e-26	8.50677e-14	1.64116e-26	1.09635e-14
157		5.13705e-15	5.10375e-15	5.08858e-15	5.0886e-15	1	1.64365e-14	5.08871e-15	2.6121e-13	5.08934e-15	1.63169e-14	5.11455e-15	5.08863e-15	1.60578e-27	1.59072e-27	1.59073e-27	2.40526e-13	3.63107e-27	1.59081e-27	4.26683e-26	1.59086e-27	3.47882e-27	1.59542e-27	1.59072e-27	1.5736e-27	1.5736e-27	2.36526e-13	3.55513e-27	1.57364e-27	4.25309e-26	1.57373e-27	3.40405e-27	1.57791e-27	1.5736e-27	1.56876e-27	2.35531e-13	3.51426e-27	1.56879e-27	4.24312e-26	1.56888e-27	3.38659e-27	1.57299e-27	1.56876e-27	2.35532e-13	3.51427e-27	1.56879e-27	4.24312e-26	1.56888e-27	3.38659e-27
158		2.59947e-16	2.58699e-16	2.58234e-16	2.58234e-16	1	5.49965e-16	2.58237e-16	6.77121e-15	2.58253e-16	5.44407e-16	2.58898e-16	2.58235e-16	3.16205e-29	3.1428e-29	3.14281e-29	8.62077e-14	6.038e-29	3.1429e-29	5.70992e-28	3.14299e-29	5.60759e-29	3.14895e-29	3.14281e-29	3.11392e-29	3.11393e-29	8.52277e-14	5.76019e-29	3.11398e-29	5.67168e-28	3.11409e-29	5.5082e-29	3.11959e-29	3.11393e-29	3.10653e-29	8.49834e-14	5.69237e-29	3.10657e-29	5.65822e-28	3.1067e-29	5.48704e-29	3.11211e-29	3.10654e-29	8.49836e-14	5.69239e-29	3.10658e-29	5.65822e-28	3.1067e-29	5.48705e-29
159		8.59769e-16	7.63742e-16	7.15909e-16	7.16289e-16	3.4864e-15	3.69781e-15	7.16794e-16	0.982945	7.30719e-16	5.28784e-15	0.000451819	1.40245e-06	3.36317e-28	2.70308e-28	2.70369e-28	8.57313e-28	8.6214e-28	2.70748e-28	1.12968e-13	2.72337e-28	1.08863e-27	9.07731e-17	3.54235e-19	2.09606e-28	2.09661e-28	7.44482e-28	7.22494e-28	2.09896e-28	1.08067e-13	2.11576e-28	9.67649e-28	7.05257e-17	2.7461e-19	1.89788e-28	6.39849e-28	6.44548e-28	1.89936e-28	1.03216e-13	1.91669e-28	8.63578e-28	6.38935e-17	2.48558e-19	6.39976e-28	6.44687e-28	1.89988e-28	1.03218e-13	1.91721e-28	8.63652e-28
160		2.89401e-17	2.85481e-17	2.83295e-17	2.83303e-17	3.43555e-17	3.48414e-17	2.83322e-17	1	2.83582e-17	3.75549e-17	8.49559e-17	2.86014e-17	6.63841e-30	6.5464e-30	6.54651e-30	7.46897e-30	7.49901e-30	6.54706e-30	1.12603e-13	6.54997e-30	7.82005e-30	1.35675e-29	6.5788e-30	6.44059e-30	6.44068e-30	7.29627e-30	7.33157e-30	6.44107e-30	1.12199e-13	6.44409e-30	7.64634e-30	1.33001e-29	6.4725e-30	6.39637e-30	7.19711e-30	7.24547e-30	6.39669e-30	1.11833e-13	6.39976e-30	7.55988e-30	1.3202e-29	6.42803e-30	7.19722e-30	7.24558e-30	6.39678e-30	1.11833e-13	6.39985e-30	7.55998e-30
161		8.10932e-15	8.05593e-15	8.0157e-15	8.01582e-15	8.98918e-15	9.08211e-15	8.01618e-15	0.904417	8.02011e-15	9.45509e-15	0.0173617	4.20311e-05	1.85956e-27	1.80016e-27	1.80018e-27	2.07064e-27	2.06868e-27	1.80049e-27	6.35054e-14	1.80083e-27	2.1068e-27	1.99971e-15	6.44515e-18	1.74434e-27	1.74436e-27	1.97962e-27	1.97607e-27	1.74454e-27	6.29242e-14	1.74497e-27	2.01012e-27	1.93769e-15	6.24537e-18	1.7232e-27	1.91575e-27	1.92094e-27	1.72333e-27	6.23505e-14	1.72379e-27	1.95746e-27	1.91418e-15	6.16964e-18	1.91578e-27	1.92097e-27	1.72335e-27	6.23508e-14	1.72381e-27	1.95748e-27
162		7.15572e-15	7.14971e-15	7.14396e-15	7.14397e-15	7.20323e-15	7.21151e-15	7.14402e-15	3.72058e-13	7.14412e-15	7.20812e-15	0.995482	0.000641736	8.59812e-28	8.54569e-28	8.5457e-28	8.74389e-28	8.74484e-28	8.54599e-28	2.95642e-26	8.54598e-28	8.72744e-28	9.75718e-14	5.24065e-17	8.49701e-28	8.49702e-28	8.66719e-28	8.6678e-28	8.4972e-28	2.94818e-26	8.49726e-28	8.64622e-28	9.70157e-14	5.2108e-17	8.47543e-28	8.61242e-28	8.61947e-28	8.47557e-28	2.94004e-26	8.47566e-28	8.60099e-28	9.67691e-14	5.19757e-17	8.61243e-28	8.61948e-28	8.47558e-28	2.94004e-26	8.47567e-28	8.601e-28
163		1.11438e-16	1.11365e-16	1.1131e-16	1.1131e-16	1.1183e-16	1.11896e-16	1.11311e-16	2.99367e-15	1.11312e-16	1.1186e-16	0.974539	0.000604486	1.31871e-29	1.31719e-29	1.31719e-29	1.32513e-29	1.32501e-29	1.3172e-29	1.98615e-28	1.3172e-29	1.32419e-29	5.93163e-14	3.51482e-17	1.31549e-29	1.31549e-29	1.32114e-29	1.32138e-29	1.3155e-29	1.98462e-28	1.3155e-29	1.32079e-29	5.92629e-14	3.51029e-17	1.31479e-29	1.31978e-29	1.32014e-29	1.3148e-29	1.9836e-28	1.3148e-29	1.31963e-29	5.92388e-14	3.50843e-17	1.31978e-29	1.32014e-29	1.3148e-29	1.9836e-28	1.3148e-29	1.31963e-29
164		2.48546e-16	2.48518e-16	2.48503e-16	2.48503e-16	2.48608e-16	2.48616e-16	2.48504e-16	6.03968e-16	2.48504e-16	2.48605e-16	0.909259	0.0182658	6.29473e-30	6.29293e-30	6.29293e-30	6.30173e-30	6.30113e-30	6.29294e-30	1.54239e-29	6.29294e-30	6.29999e-30	7.82348e-15	2.38625e-16	6.29054e-30	6.29054e-30	6.29595e-30	6.29593e-30	6.29054e-30	1.54075e-29	6.29054e-30	6.2952e-30	7.82125e-15	2.38534e-16	6.28974e-30	6.29442e-30	6.29454e-30	6.28974e-30	1.53995e-29	6.28974e-30	6.2939e-30	7.82024e-15	2.38504e-16	6.29442e-30	6.29454e-30	6.28974e-30	1.53995e-29	6.28974e-30	6.2939e-30
165	Eastern	9.78778e-16	8.60105e-16	9.55641e-06	1.18091e-05	2.1198e-15	1.50838e-05	9.32577e-06	0.840781	2.28483e-05	0.0233168	2.12247e-05	7.70208e-16	1.93146e-28	9.06569e-19	1.13982e-18	2.60081e-28	2.00148e-18	1.70038e-18	2.66919e-14	3.34018e-18	2.92598e-15	3.18709e-18	1.46031e-28	6.59437e-19	8.29107e-19	2.2782e-28	1.51758e-18	1.23892e-18	2.23742e-14	2.42993e-18	2.15184e-15	2.32773e-18	1.06226e-28	3.58752e-08	8.90224e-19	2.28707e-09	1.85422e-09	0.000114765	2.47926e-08	1.2012e-05	1.96546e-08	4.05666e-19	1.11927e-18	2.28796e-09	1.85494e-09	0.000208043	2.56893e-08	9.39062e-06
166		1.7627e-14	1.72003e-14	1.70587e-14	1.71603e-14	1.79096e-14	1.75115e-14	1.72293e-14	0.388929	1.77633e-14	0.498001	6.56477e-05	1.68837e-14	2.4936e-27	2.09359e-27	2.09703e-27	2.69602e-27	2.16868e-27	2.10106e-27	1.29571e-14	2.11704e-27	3.49608e-14	4.65707e-18	2.08626e-27	1.74295e-27	1.74626e-27	2.44374e-27	1.80891e-27	1.75088e-27	1.18449e-14	1.76568e-27	2.92844e-14	3.88387e-18	1.73614e-27	1.40733e-27	1.81327e-27	1.44764e-27	1.41079e-27	1.06296e-14	1.42583e-27	2.36706e-14	3.13451e-18	1.39809e-27	1.81674e-27	1.45085e-27	1.41394e-27	1.06314e-14	1.42897e-27	2.37199e-14
167		6.54604e-15	6.44629e-15	6.39525e-15	6.41274e-15	6.57327e-15	6.47586e-15	6.42474e-15	0.39453	6.51655e-15	0.474937	0.000125294	6.36507e-15	8.56503e-28	7.38829e-28	7.39713e-28	8.79669e-28	7.52414e-28	7.40835e-28	1.2421e-14	7.44946e-28	1.49812e-14	1.00002e-17	7.37174e-28	6.28462e-28	6.29312e-28	6.76817e-28	6.35246e-28	6.30045e-28	1.19575e-14	6.34354e-28	1.43498e-14	8.5111e-18	6.26947e-28	6.05763e-28	6.34023e-28	6.10308e-28	6.06417e-28	1.14792e-14	6.10759e-28	1.3728e-14	8.19348e-18	6.0344e-28	6.34879e-28	6.11153e-28	6.0726e-28	1.14805e-14	6.11602e-28	1.37344e-14
168		4.30651e-15	4.29649e-15	4.28845e-15	4.28888e-15	4.30083e-15	4.29111e-15	4.2892e-15	1	4.29144e-15	2.30487e-13	4.55737e-15	4.28769e-15	1.57479e-27	1.56032e-27	1.56041e-27	1.57722e-27	1.56186e-27	1.56054e-27	2.39814e-13	1.56094e-27	4.46079e-26	1.60978e-27	1.56016e-27	1.54649e-27	1.54657e-27	1.55204e-27	1.54723e-27	1.54665e-27	2.36793e-13	1.54708e-27	4.44931e-26	1.59568e-27	1.54634e-27	1.54322e-27	1.54717e-27	1.54377e-27	1.54329e-27	2.33775e-13	1.54372e-27	4.43804e-26	1.59228e-27	1.54298e-27	1.54725e-27	1.54385e-27	1.54337e-27	2.33784e-13	1.5438e-27	4.43816e-26
169		2.92844e-17	2.92202e-17	2.916e-17	2.9161e-17	2.92361e-17	2.91695e-17	2.9162e-17	1	2.9167e-17	5.69884e-16	2.97953e-17	2.91582e-17	3.79775e-30	3.76243e-30	3.76252e-30	3.80261e-30	3.76548e-30	3.76274e-30	7.08068e-14	3.76301e-30	4.43835e-29	3.80968e-30	3.76226e-30	3.72908e-30	3.72916e-30	3.74354e-30	3.7304e-30	3.72927e-30	7.05946e-14	3.72961e-30	4.4261e-29	3.77591e-30	3.72894e-30	3.71895e-30	3.73001e-30	3.71996e-30	3.71904e-30	7.03828e-14	3.71939e-30	4.41382e-29	3.76563e-30	3.71873e-30	3.73009e-30	3.72004e-30	3.71912e-30	7.03835e-14	3.71947e-30	4.41386e-29
170		4.68572e-15	4.67657e-15	4.66852e-15	4.66901e-15	4.68208e-15	4.67148e-15	4.66939e-15	2.49585e-13	4.67192e-15	0.988252	0.000341669	4.66766e-15	1.03913e-27	1.02057e-27	1.02064e-27	1.0422e-27	1.02232e-27	1.02077e-27	3.03416e-26	1.02102e-27	1.29225e-13	5.15563e-17	1.02045e-27	1.0033e-27	1.00336e-27	1.01057e-27	1.00405e-27	1.00343e-27	3.02062e-26	1.00372e-27	1.25905e-13	5.06802e-17	1.0032e-27	9.99209e-28	1.00384e-27	9.99722e-28	9.99267e-28	3.00667e-26	9.99559e-28	1.22559e-13	5.04697e-17	9.99044e-28	1.0039e-27	9.99781e-28	9.99326e-28	3.00671e-26	9.99618e-28	1.22566e-13
171		1.41475e-16	1.41153e-16	1.40838e-16	1.40842e-16	1.41237e-16	1.40885e-16	1.40847e-16	2.46464e-15	1.4087e-16	0.955262	0.000376166	1.40829e-16	2.34211e-29	2.28781e-29	2.28787e-29	2.34902e-29	2.29214e-29	2.28816e-29	2.52803e-28	2.28822e-29	7.43771e-14	6.03937e-17	2.28767e-29	2.23726e-29	2.23731e-29	2.25483e-29	2.23866e-29	2.23741e-29	2.50904e-28	2.23759e-29	7.38668e-14	5.90535e-17	2.23716e-29	2.22564e-29	2.23747e-29	2.22661e-29	2.22572e-29	2.48979e-28	2.22592e-29	7.33524e-14	5.87449e-17	2.22551e-29	2.23752e-29	2.22666e-29	2.22577e-29	2.48981e-28	2.22596e-29	7.33535e-14
172		6.94458e-17	6.93853e-17	6.93414e-17	6.93415e-17	6.93916e-17	6.93455e-17	6.93418e-17	1.39129e-16	6.93423e-17	0.777011	0.000438221	6.93411e-17	1.20407e-29	1.20132e-29	1.20132e-29	1.20441e-29	1.20153e-29	1.20133e-29	2.11718e-29	1.20133e-29	7.57399e-14	4.11232e-17	1.20131e-29	1.19859e-29	1.19859e-29	1.19981e-29	1.19868e-29	1.1986e-29	2.10876e-29	1.1986e-29	7.56717e-14	4.10484e-17	1.19858e-29	1.19767e-29	1.19864e-29	1.19774e-29	1.19767e-29	2.10045e-29	1.19768e-29	7.56035e-14	4.10238e-17	1.19766e-29	1.19865e-29	1.19774e-29	1.19767e-29	2.10046e-29	1.19768e-29	7.56036e-14
173		9.23555e-17	9.22397e-17	9.2173e-17	9.21732e-17	9.22481e-17	9.21791e-17	9.21737e-17	1.92993e-16	9.21744e-17	0.94002	0.000363413	9.21726e-17	1.05808e-29	1.05377e-29	1.05377e-29	1.05861e-29	1.05411e-29	1.05379e-29	2.15179e-29	1.05379e-29	5.14654e-14	1.29507e-17	1.05376e-29	1.04945e-29	1.04945e-29	1.05118e-29	1.04958e-29	1.04946e-29	2.1376e-29	1.04947e-29	5.13842e-14	1.29123e-17	1.04945e-29	1.04818e-29	1.0495e-29	1.04828e-29	1.04818e-29	2.124e-29	1.04819e-29	5.13037e-14	1.29016e-17	1.04817e-29	1.04951e-29	1.04828e-29	1.04819e-29	2.12401e-29	1.04819e-29	5.13039e-14
174		2.09875e-16	2.09848e-16	2.09824e-16	2.09824e-16	2.09852e-16	2.09826e-16	2.09824e-16	2.38664e-16	2.09824e-16	0.792367	0.00511121	2.09823e-16	8.05164e-30	8.04599e-30	8.04599e-30	8.05236e-30	8.04644e-30	8.04602e-30	9.80876e-30	8.04602e-30	1.82551e-14	9.59613e-17	8.04597e-30	8.04058e-30	8.04059e-30	8.04331e-30	8.04079e-30	8.0406e-30	9.79191e-30	8.04061e-30	1.8247e-14	9.5888e-17	8.04057e-30	8.03848e-30	8.04074e-30	8.03865e-30	8.0385e-30	9.77543e-30	8.0385e-30	1.8239e-14	9.5861e-17	8.03847e-30	8.04075e-30	8.03866e-30	8.0385e-30	9.77544e-30	8.03851e-30	1.82391e-14
175		4.85301e-17	4.85235e-17	4.852e-17	4.852e-17	4.85239e-17	4.85203e-17	4.852e-17	5.20289e-17	4.852e-17	1	9.6821e-16	4.85199e-17	1.53625e-30	1.53594e-30	1.53594e-30	1.53629e-30	1.53597e-30	1.53594e-30	1.66348e-30	1.53594e-30	1.89338e-14	2.07148e-29	1.53594e-30	1.53555e-30	1.53555e-30	1.53573e-30	1.53556e-30	1.53555e-30	1.66142e-30	1.53555e-30	1.89301e-14	2.07095e-29	1.53554e-30	1.53539e-30	1.53556e-30	1.5354e-30	1.53539e-30	1.66045e-30	1.53539e-30	1.89272e-14	2.07076e-29	1.53539e-30	1.53556e-30	1.53541e-30	1.53539e-30	1.66045e-30	1.53539e-30	1.89272e-14
176		2.9497e-16	2.94963e-16	2.94955e-16	2.94955e-16	2.94964e-16	2.94956e-16	2.94956e-16	3.03183e-16	2.94956e-16	0.0343993	0.270832	2.94955e-16	9.73068e-30	9.72957e-30	9.72957e-30	9.73083e-30	9.72966e-30	9.72958e-30	1.02142e-29	9.72958e-30	3.64778e-16	7.6239e-15	9.72957e-30	9.7285e-30	9.7285e-30	9.72916e-30	9.72855e-30	9.72851e-30	1.02112e-29	9.72851e-30	3.64735e-16	7.62295e-15	9.7285e-30	9.72798e-30	9.72856e-30	9.72802e-30	9.72798e-30	1.02083e-29	9.72798e-30	3.64692e-16	7.62251e-15	9.72798e-30	9.72856e-30	9.72802e-30	9.72798e-30	1.02083e-29	9.72799e-30	3.64692e-16
177		2.96854e-17	2.96849e-17	2.96845e-17	2.96845e-17	2.96849e-17	2.96845e-17	2.96845e-17	3.01346e-17	2.96845e-17	0.0148142	0.24815	2.96845e-17	5.09167e-31	5.09144e-31	5.09144e-31	5.0917e-31	5.09145e-31	5.09144e-31	5.20066e-31	5.09144e-31	9.00957e-17	3.4635e-15	5.09143e-31	5.09114e-31	5.09114e-31	5.09129e-31	5.09115e-31	5.09114e-31	5.19899e-31	5.09114e-31	9.00891e-17	3.4633e-15	5.09114e-31	5.09101e-31	5.09115e-31	5.09102e-31	5.09101e-31	5.19824e-31	5.09101e-31	9.00841e-17	3.4632e-15	5.09101e-31	5.09115e-31	5.09102e-31	5.09101e-31	5.19824e-31	5.09101e-31	9.00841e-17
178		3.08212e-18	3.08211e-18	3.08211e-18	3.08211e-18	3.08211e-18	3.08211e-18	3.08211e-18	3.08587e-18	3.08211e-18	0.028248	0.0109456	3.08211e-18	3.89564e-32	3.89563e-32	3.89563e-32	3.89564e-32	3.89563e-32	3.89563e-32	3.90228e-32	3.89563e-32	3.26533e-16	5.49801e-17	3.89563e-32	3.89561e-32	3.89561e-32	3.89561e-32	3.89561e-32	3.89561e-32	3.90214e-32	3.89561e-32	3.2652e-16	5.49796e-17	3.89561e-32	3.8956e-32	3.89561e-32	3.8956e-32	3.8956e-32	3.90209e-32	3.8956e-32	3.26512e-16	5.49794e-17	3.8956e-32	3.89561e-32	3.8956e-32	3.8956e-32	3.90209e-32	3.8956e-32	3.26512e-16
179		1.81487e-16	1.66209e-16	2.21942e-05	2.2173e-05	2.44773e-16	8.64249e-06	7.22839e-06	0.905643	2.84036e-05	0.0111427	1.63746e-05	1.52862e-16	3.10266e-29	1.11207e-18	1.12364e-18	3.5502e-29	1.34472e-18	1.21391e-18	3.38924e-14	2.79924e-18	3.81836e-16	1.90008e-18	2.0097e-29	5.72725e-19	5.78684e-19	1.7814e-29	6.99464e-19	6.24963e-19	2.96842e-14	1.44162e-18	3.1374e-16	9.83779e-19	1.03504e-29	4.8989e-08	7.07956e-19	1.03486e-08	9.28851e-09	0.00046095	5.75695e-08	1.27595e-05	3.78643e-08	4.4708e-19	7.15322e-19	1.03387e-08	9.27967e-09	0.000853695	4.86589e-08	6.91426e-06
180		3.21869e-16	2.94509e-16	3.12518e-16	3.13825e-16	3.01514e-16	4.08159e-05	4.0384e-05	0.978867	3.88752e-16	0.000655356	1.02729e-06	2.84511e-16	4.61251e-29	4.12166e-29	4.12824e-29	4.76993e-29	5.5809e-18	5.46335e-18	6.02279e-14	4.52573e-29	2.84021e-17	8.57557e-20	3.9193e-29	3.37426e-29	3.38086e-29	3.52844e-29	4.51032e-18	4.45948e-18	5.7976e-14	3.77007e-29	2.66271e-17	7.14041e-20	3.20085e-29	3.38735e-29	3.43961e-29	4.5189e-18	4.47742e-18	5.62899e-14	3.77462e-29	2.51317e-17	7.15615e-20	3.21415e-29	3.44621e-29	4.5281e-18	4.48663e-18	5.62956e-14	3.78123e-29	2.51353e-17
181		2.09009e-16	2.0694e-16	2.06788e-16	2.06819e-16	2.07227e-16	3.05336e-16	3.0458e-16	1	2.08612e-16	8.24506e-16	2.10462e-16	2.06054e-16	7.36561e-29	7.30324e-29	7.3038e-29	7.37995e-29	9.07087e-29	9.0514e-29	1.54178e-13	7.33749e-29	1.92697e-28	7.3694e-29	7.28727e-29	7.2077e-29	7.20827e-29	7.23458e-29	8.95982e-29	8.94463e-29	1.53712e-13	7.24153e-29	1.90381e-28	7.27378e-29	7.19318e-29	7.19505e-29	7.21306e-29	8.94644e-29	8.93193e-29	1.53383e-13	7.22822e-29	1.88622e-28	7.2606e-29	7.18026e-29	7.21363e-29	8.94712e-29	8.93261e-29	1.53385e-13	7.22879e-29	1.88628e-28
182		4.61216e-19	4.60993e-19	4.60885e-19	4.60887e-19	4.61046e-19	4.65309e-19	4.6526e-19	1	4.6099e-19	4.96882e-19	4.61059e-19	4.60823e-19	1.10716e-32	1.10649e-32	1.10649e-32	1.10732e-32	1.11265e-32	1.11254e-32	1.31481e-14	1.10665e-32	1.16402e-32	1.10673e-32	1.10637e-32	1.10566e-32	1.10566e-32	1.10609e-32	1.11176e-32	1.11168e-32	1.31436e-14	1.10581e-32	1.16238e-32	1.1059e-32	1.10555e-32	1.10538e-32	1.10575e-32	1.11147e-32	1.11139e-32	1.31405e-14	1.10554e-32	1.16101e-32	1.10562e-32	1.10527e-32	1.10575e-32	1.11148e-32	1.1114e-32	1.31406e-14	1.10554e-32	1.16101e-32
183		1.14769e-15	1.14287e-15	1.14356e-15	1.14371e-15	1.1442e-15	0.000542411	0.000542155	0.875982	1.15243e-15	0.00136714	1.53558e-05	1.14002e-15	2.77545e-28	2.73555e-28	2.73574e-28	2.78308e-28	1.29556e-16	1.2937e-16	1.32227e-13	2.74752e-28	1.45349e-16	2.299e-18	2.72928e-28	2.68933e-28	2.68953e-28	2.70311e-28	1.27295e-16	1.27218e-16	1.31569e-13	2.70102e-28	1.41423e-16	2.26039e-18	2.68403e-28	2.68297e-28	2.69097e-28	1.26976e-16	1.26916e-16	1.31085e-13	2.69441e-28	1.37923e-16	2.25492e-18	2.67769e-28	2.69117e-28	1.26985e-16	1.26925e-16	1.31087e-13	2.6946e-28	1.3793e-16
184		3.05984e-15	3.05236e-15	3.05051e-15	3.05053e-15	3.05286e-15	1.37332e-14	1.37278e-14	0.886143	3.05187e-15	0.0187695	0.000173918	3.04972e-15	4.85111e-28	4.84445e-28	4.84447e-28	4.85236e-28	1.36203e-27	1.36149e-27	4.23529e-14	4.84583e-28	1.27538e-15	1.66664e-17	4.84347e-28	4.83322e-28	4.83324e-28	4.83708e-28	1.35992e-27	1.35945e-27	4.23207e-14	4.83457e-28	1.2694e-15	1.66278e-17	4.83236e-28	4.83058e-28	4.83375e-28	1.35951e-27	1.35906e-27	4.22992e-14	4.83189e-28	1.26593e-15	1.66187e-17	4.82972e-28	4.83378e-28	1.35952e-27	1.35907e-27	4.22993e-14	4.83191e-28	1.26593e-15
185		2.49971e-17	2.49578e-17	2.49451e-17	2.49451e-17	2.49605e-17	6.70274e-17	6.70051e-17	1	2.49506e-17	6.78528e-16	4.0265e-17	2.49417e-17	2.17233e-30	2.16925e-30	2.16925e-30	2.17277e-30	4.15841e-30	4.15698e-30	4.71563e-14	2.16954e-30	3.52899e-29	2.83904e-30	2.16901e-30	2.1649e-30	2.16491e-30	2.16643e-30	4.15134e-30	4.15018e-30	4.71285e-14	2.16518e-30	3.52517e-29	2.83454e-30	2.16471e-30	2.16375e-30	2.16503e-30	4.14972e-30	4.14859e-30	4.71101e-14	2.16402e-30	3.52299e-29	2.83335e-30	2.16357e-30	2.16503e-30	4.14972e-30	4.14859e-30	4.71102e-14	2.16403e-30	3.523e-29
186		4.08733e-15	4.08688e-15	4.08666e-15	4.08666e-15	4.08697e-15	4.40817e-15	4.40798e-15	2.10422e-13	4.08675e-15	0.978189	0.0016723	4.08658e-15	2.07353e-28	2.0725e-28	2.0725e-28	2.07374e-28	2.26056e-28	2.26032e-28	8.81777e-27	2.0726e-28	4.20724e-14	5.90073e-17	2.07238e-28	2.0713e-28	2.0713e-28	2.07191e-28	2.25856e-28	2.2584e-28	8.8144e-27	2.0714e-28	4.20105e-14	5.89731e-17	2.07119e-28	2.07089e-28	2.0714e-28	2.25797e-28	2.25782e-28	8.81216e-27	2.07098e-28	4.19679e-14	5.89614e-17	2.07079e-28	2.0714e-28	2.25798e-28	2.25782e-28	8.81216e-27	2.07099e-28	4.19679e-14
187		1.72112e-16	1.72096e-16	1.72087e-16	1.72087e-16	1.72099e-16	1.79074e-16	1.79069e-16	4.57705e-15	1.72089e-16	0.895005	0.000543159	1.72085e-16	1.38948e-29	1.3889e-29	1.3889e-29	1.38956e-29	1.42635e-29	1.42625e-29	2.19545e-28	1.38892e-29	4.23827e-14	3.01026e-17	1.38887e-29	1.38828e-29	1.38828e-29	1.38853e-29	1.42524e-29	1.42519e-29	2.195e-28	1.38829e-29	4.23706e-14	3.00891e-17	1.38826e-29	1.38809e-29	1.38829e-29	1.42496e-29	1.42491e-29	2.19468e-28	1.38811e-29	4.23623e-14	3.00851e-17	1.38807e-29	1.38829e-29	1.42496e-29	1.42491e-29	2.19469e-28	1.38811e-29	4.23623e-14
188		1.55948e-15	1.53709e-15	0.000642336	0.000639906	1.56439e-15	1.66751e-15	1.65135e-15	0.851268	0.000650584	0.0300521	0.000262162	1.52115e-15	1.42781e-28	2.02383e-17	2.09421e-17	1.46832e-28	1.2886e-28	1.26632e-28	3.4852e-14	6.60668e-17	2.86443e-15	2.89979e-17	1.21934e-28	1.70371e-17	1.76296e-17	1.11453e-28	1.08044e-28	1.06954e-28	3.36428e-14	5.56149e-17	2.44632e-15	2.4402e-17	1.02647e-28	3.94714e-06	1.71941e-17	1.71436e-17	1.70031e-17	0.00176482	6.16667e-06	0.000218545	3.70684e-06	1.63032e-17	1.7792e-17	1.77398e-17	1.75944e-17	0.00352424	4.89672e-06	0.000111914
189		4.60446e-16	4.56382e-16	8.93935e-16	9.36322e-16	4.57145e-16	4.57467e-16	4.57016e-16	0.500827	0.00035084	0.031159	0.00031905	4.54495e-16	1.32779e-28	2.00298e-28	2.0624e-28	1.33051e-28	1.3191e-28	1.31756e-28	8.50418e-14	9.15434e-17	7.06678e-15	8.69044e-17	1.31361e-28	1.9756e-28	2.03506e-28	1.30474e-28	1.30196e-28	1.30104e-28	8.47935e-14	9.03932e-17	6.94007e-15	8.58174e-17	1.29723e-28	2.70356e-28	1.97723e-28	1.9758e-28	1.9745e-28	9.05306e-14	1.34763e-16	8.63543e-15	1.30209e-16	1.96826e-28	2.03669e-28	2.03526e-28	2.03396e-28	9.06565e-14	1.38696e-16	8.77865e-15
190		2.6549e-15	2.59002e-15	2.71917e-15	2.72866e-15	2.59068e-15	2.57465e-15	2.57331e-15	0.718196	2.01322e-14	0.181362	1.99173e-14	2.57233e-15	3.54826e-28	3.66153e-28	3.6697e-28	3.54929e-28	3.53502e-28	3.53383e-28	2.50293e-14	1.52588e-27	7.48724e-15	1.50948e-27	3.53298e-28	3.61399e-28	3.62218e-28	3.50087e-28	3.48924e-28	3.48824e-28	2.50018e-14	1.52075e-27	7.46073e-15	1.5044e-27	3.48742e-28	3.73548e-28	3.61456e-28	3.60305e-28	3.60204e-28	2.53013e-14	1.55399e-27	7.59346e-15	1.53766e-27	3.60113e-28	3.62274e-28	3.61124e-28	3.61022e-28	2.53092e-14	1.55675e-27	7.60409e-15
191		4.60272e-16	4.59169e-16	4.61757e-16	4.61952e-16	4.59186e-16	4.58892e-16	4.58866e-16	1	7.45394e-16	2.20865e-14	7.4181e-16	4.58844e-16	2.24917e-29	2.2629e-29	2.26397e-29	2.24954e-29	2.24596e-29	2.24568e-29	3.88388e-14	3.29307e-29	7.64299e-28	3.27847e-29	2.24552e-29	2.25544e-29	2.25651e-29	2.24129e-29	2.23944e-29	2.23927e-29	3.87695e-14	3.28534e-29	7.63226e-28	3.27088e-29	2.23913e-29	2.27064e-29	2.25552e-29	2.25375e-29	2.25359e-29	3.9011e-14	3.30938e-29	7.68542e-28	3.29495e-29	2.25343e-29	2.25659e-29	2.25482e-29	2.25466e-29	3.90187e-14	3.31131e-29	7.68968e-28
192		2.2577e-14	2.1596e-14	0.0166594	0.0165951	2.16215e-14	2.14218e-14	2.13931e-14	0.854709	0.00288983	0.0770573	4.07472e-14	2.13162e-14	5.89041e-28	2.63525e-16	2.96362e-16	5.95553e-28	5.47519e-28	5.43773e-28	9.8688e-15	4.83328e-17	1.18381e-15	8.12895e-28	5.41726e-28	2.38724e-16	2.6847e-16	5.08252e-28	4.93608e-28	4.92268e-28	9.69168e-15	4.46367e-17	1.09416e-15	7.50574e-28	4.90741e-28	0.000184769	2.38841e-16	2.34503e-16	2.3405e-16	0.00306429	2.58601e-05	0.000694807	3.58475e-16	2.33352e-16	2.68602e-16	2.63724e-16	2.63214e-16	0.00745029	1.22132e-05	0.000290086
193		4.75549e-14	4.68976e-14	0.0637671	3.78593e-13	4.69183e-14	4.67598e-14	4.67389e-14	0.897903	1.15554e-13	1.61477e-12	5.75874e-14	4.66903e-14	6.55603e-27	5.09677e-15	3.14053e-26	6.57047e-27	6.449e-27	6.4397e-27	4.28856e-14	1.14656e-26	1.22166e-25	7.22826e-27	6.43426e-27	4.98144e-15	3.09579e-26	6.33162e-27	6.29611e-27	6.29279e-27	4.24362e-14	1.12714e-26	1.21022e-25	7.06704e-27	6.28867e-27	2.44464e-14	4.98157e-15	4.96222e-15	4.96022e-15	0.0383298	8.89628e-15	9.5111e-14	5.57163e-15	4.9571e-15	3.09595e-26	3.08822e-26	3.08741e-26	1.54519e-13	3.737e-26	1.53559e-25
194		5.31247e-16	5.30554e-16	1	8.24865e-16	5.30594e-16	5.30312e-16	5.30283e-16	2.74066e-14	5.86734e-16	1.81761e-15	5.38644e-16	5.30243e-16	7.16432e-29	1.28564e-13	9.26841e-29	7.16521e-29	7.15791e-29	7.15734e-29	1.94149e-27	7.55732e-29	1.63131e-28	7.21657e-29	7.15699e-29	1.2839e-13	9.25052e-29	7.15117e-29	7.14792e-29	7.14762e-29	1.94071e-27	7.54617e-29	1.62795e-28	7.20626e-29	7.14732e-29	1.66083e-13	1.28394e-13	1.28345e-13	1.2834e-13	3.48516e-12	1.35494e-13	2.91975e-13	1.29392e-13	1.28335e-13	9.25077e-29	9.24641e-29	9.24602e-29	2.14308e-27	9.65048e-29	1.84328e-28
195		6.60131e-16	6.55156e-16	1.81498e-14	2.98558e-15	6.55296e-16	6.54136e-16	6.53985e-16	1	1.13699e-15	1.1662e-14	7.30088e-16	6.53643e-16	1.86067e-28	2.85237e-27	5.2721e-28	1.86101e-28	1.85819e-28	1.85789e-28	1.42883e-13	2.56359e-28	1.7976e-27	1.96906e-28	1.85737e-28	2.84531e-27	5.2602e-28	1.85165e-28	1.8497e-28	1.84946e-28	1.42421e-13	2.55461e-28	1.79388e-27	1.96046e-28	1.84895e-28	4.24062e-27	2.84533e-27	2.84411e-27	2.84397e-27	9.47501e-13	3.12773e-27	9.33562e-27	2.8882e-27	2.84375e-27	5.26039e-28	5.25796e-28	5.25767e-28	2.20463e-13	5.97682e-28	2.14217e-27
196		1.49174e-20	1.48998e-20	6.60388e-20	2.13399e-20	1.49003e-20	1.48959e-20	1.48954e-20	1	1.62061e-20	4.47903e-20	1.50992e-20	1.48945e-20	4.50295e-35	1.44291e-34	5.70522e-35	4.50311e-35	4.50154e-35	4.5014e-35	1.74838e-15	4.74324e-35	1.00444e-34	4.53871e-35	4.50121e-35	1.44004e-34	5.69929e-35	4.49829e-35	4.4972e-35	4.49709e-35	1.74725e-15	4.73868e-35	1.00211e-34	4.53433e-35	4.49691e-35	1.67116e-34	1.44003e-34	1.43951e-34	1.43947e-34	3.74926e-15	1.48376e-34	2.46266e-34	1.44607e-34	1.43943e-34	5.69937e-35	5.69806e-35	5.69792e-35	1.9444e-15	5.94091e-35	1.12331e-34
197		1.82751e-13	1.82352e-13	3.989e-13	0.444895	1.82378e-13	1.82246e-13	1.8223e-13	9.91737e-12	0.040084	0.477259	1.88564e-13	1.82202e-13	1.76561e-26	2.93219e-26	2.16637e-14	1.76658e-26	1.75966e-26	1.75913e-26	5.35449e-25	3.15754e-15	2.47905e-14	1.79417e-26	1.75889e-26	2.9114e-26	2.15708e-14	1.75424e-26	1.75174e-26	1.75152e-26	5.344e-25	3.14273e-15	2.45137e-14	1.78573e-26	1.75134e-26	3.57997e-14	2.9116e-26	2.90755e-26	2.90714e-26	5.94466e-25	5.29416e-15	4.35606e-14	3.00829e-26	2.90659e-26	2.15724e-14	2.15511e-14	2.15491e-14	6.5699e-13	0.00264624	0.0303786
198		1.58866e-15	1.58676e-15	2.53269e-15	4.41704e-14	1.58687e-15	1.58627e-15	1.5862e-15	4.41012e-14	0.00339759	0.830288	1.61387e-15	1.58607e-15	3.5339e-28	4.6176e-28	5.38987e-27	3.53408e-28	3.53296e-28	3.53284e-28	5.22089e-27	5.54984e-16	1.45937e-13	3.56464e-28	3.5327e-28	4.61413e-28	5.38781e-27	3.53114e-28	3.53032e-28	3.53023e-28	5.21951e-27	5.54566e-16	1.45663e-13	3.56195e-28	3.53008e-28	5.77439e-27	4.61426e-28	4.61335e-28	4.61325e-28	5.35291e-27	7.2372e-16	1.89136e-13	4.6484e-28	4.61309e-28	5.38785e-27	5.38736e-27	5.38731e-27	2.26807e-26	8.40541e-15	2.14957e-12
199		1.17157e-16	1.17066e-16	1.48128e-16	1.52398e-15	1.1707e-16	1.17043e-16	1.1704e-16	1.51086e-15	1.01437e-15	1	1.17947e-16	1.17036e-16	8.37277e-30	1.00006e-29	8.39089e-29	8.37317e-30	8.36983e-30	8.36955e-30	8.12904e-29	4.69837e-29	5.06067e-14	8.41728e-30	8.3693e-30	9.99058e-30	8.38365e-29	8.36458e-30	8.36252e-30	8.36232e-30	8.12294e-29	4.69592e-29	5.05424e-14	8.40985e-30	8.36209e-30	8.83189e-29	9.99074e-30	9.98846e-30	9.98824e-30	8.31252e-29	5.55345e-29	6.08203e-14	1.00393e-29	9.98798e-30	8.38364e-29	8.38229e-29	8.38217e-29	2.83422e-28	4.44744e-28	5.24198e-13
200		3.01235e-17	3.01011e-17	3.87459e-17	4.20533e-16	3.01022e-17	3.00953e-17	3.00945e-17	4.18169e-16	0.000414459	0.62816	3.03471e-17	3.00933e-17	2.33581e-30	2.74249e-30	2.09929e-29	2.3359e-30	2.33521e-30	2.33515e-30	2.05657e-29	2.16927e-17	3.44076e-14	2.34706e-30	2.33509e-30	2.74042e-30	2.09798e-29	2.33407e-30	2.33361e-30	2.33356e-30	2.05545e-29	2.16777e-17	3.43784e-14	2.34544e-30	2.3335e-30	2.18201e-29	2.74046e-30	2.73996e-30	2.73991e-30	2.10021e-29	2.54384e-17	3.91269e-14	2.75233e-30	2.73985e-30	2.09798e-29	2.09773e-29	2.09771e-29	5.84332e-29	1.94111e-16	2.53075e-13
201		9.80162e-16	9.78666e-16	1.52144e-15	1	9.78758e-16	9.78153e-16	9.78092e-16	2.52365e-14	3.37858e-15	2.71694e-14	9.93856e-16	9.78015e-16	1.19485e-28	1.54264e-28	1.01502e-13	1.19513e-28	1.19278e-28	1.19261e-28	1.66689e-27	2.77438e-28	1.85707e-27	1.20294e-28	1.19253e-28	1.53743e-28	1.01271e-13	1.19079e-28	1.18994e-28	1.18987e-28	1.66558e-27	2.77062e-28	1.85462e-27	1.19999e-28	1.18981e-28	1.3076e-13	1.53744e-28	1.53644e-28	1.53635e-28	1.71308e-27	3.23887e-28	2.04772e-27	1.54811e-28	1.53628e-28	1.01274e-13	1.01218e-13	1.01213e-13	1.41676e-12	2.35738e-13	1.57702e-12
202		1.20847e-16	1.20738e-16	1.54384e-16	1	1.20743e-16	1.20703e-16	1.20699e-16	1.62422e-15	2.69961e-16	1.75016e-15	1.21676e-16	1.20694e-16	1.09242e-29	1.28919e-29	5.53422e-14	1.09252e-29	1.09165e-29	1.09159e-29	9.86593e-29	1.97977e-29	1.08391e-28	1.09738e-29	1.09155e-29	1.28699e-29	5.52692e-14	1.09067e-29	1.09027e-29	1.09023e-29	9.85455e-29	1.97808e-29	1.08231e-28	1.09595e-29	1.0902e-29	6.47071e-14	1.287e-29	1.28654e-29	1.2865e-29	1.00897e-28	2.20967e-29	1.14804e-28	1.29271e-29	1.28646e-29	5.52702e-14	5.52524e-14	5.52508e-14	4.76302e-13	9.82742e-14	5.2718e-13
203		7.28441e-17	7.28352e-17	7.43846e-17	1	7.28354e-17	7.2833e-17	7.28327e-17	1.42008e-16	7.98106e-17	1.49211e-16	7.28778e-17	7.28325e-17	3.5328e-30	3.64122e-30	3.17907e-14	3.53285e-30	3.53232e-30	3.53228e-30	8.36547e-30	4.02933e-30	9.0099e-30	3.53547e-30	3.53226e-30	3.63959e-30	3.17735e-14	3.53147e-30	3.5312e-30	3.53117e-30	8.35369e-30	4.02802e-30	8.99476e-30	3.53433e-30	3.53116e-30	3.39962e-14	3.6396e-30	3.63928e-30	3.63926e-30	8.48255e-30	4.15376e-30	9.3345e-30	3.64267e-30	3.63923e-30	3.17737e-14	3.17695e-14	3.17692e-14	1.30929e-13	4.1901e-14	1.42905e-13
204		1.30482e-16	1.30364e-16	1.66694e-16	1	1.3037e-16	1.30327e-16	1.30323e-16	1.75372e-15	2.91486e-16	1.8897e-15	1.31378e-16	1.30317e-16	9.95843e-30	1.18658e-29	4.77152e-14	9.95953e-30	9.94988e-30	9.94914e-30	9.49677e-29	1.8589e-29	1.04867e-28	1.00054e-29	9.94877e-30	1.18414e-29	4.76418e-14	9.93918e-30	9.93495e-30	9.93459e-30	9.48362e-29	1.85704e-29	1.04682e-28	9.99007e-30	9.93428e-30	5.7072e-14	1.18415e-29	1.18366e-29	1.18362e-29	9.71917e-29	2.0884e-29	1.11961e-28	1.18973e-29	1.18358e-29	4.76429e-14	4.7625e-14	4.76234e-14	4.68324e-13	9.06217e-14	5.19296e-13
205		6.58227e-17	6.58146e-17	6.72272e-17	1	6.58148e-17	6.58126e-17	6.58124e-17	1.28879e-16	7.21749e-17	1.35457e-16	6.58534e-17	6.58122e-17	2.22573e-30	2.30776e-30	2.27573e-14	2.22577e-30	2.2253e-30	2.22527e-30	5.88094e-30	2.60262e-30	6.3898e-30	2.22769e-30	2.22525e-30	2.30636e-30	2.27407e-14	2.2246e-30	2.22438e-30	2.22436e-30	5.87e-30	2.60152e-30	6.37571e-30	2.22675e-30	2.22435e-30	2.4869e-14	2.30636e-30	2.30609e-30	2.30607e-30	5.97118e-30	2.69977e-30	6.67439e-30	2.3087e-30	2.30606e-30	2.2741e-14	2.27369e-14	2.27366e-14	1.17683e-13	3.24404e-14	1.29183e-13
206		3.4868e-17	3.48672e-17	3.49742e-17	1	3.48672e-17	3.4867e-17	3.4867e-17	3.96437e-17	3.53544e-17	4.0212e-17	3.48701e-17	3.48669e-17	2.27666e-30	2.28339e-30	3.35267e-14	2.27666e-30	2.27663e-30	2.27663e-30	2.57702e-30	2.30752e-30	2.61655e-30	2.27683e-30	2.27663e-30	2.28331e-30	3.35241e-14	2.27658e-30	2.27657e-30	2.27657e-30	2.57655e-30	2.30745e-30	2.61595e-30	2.27676e-30	2.27657e-30	3.38615e-14	2.28331e-30	2.28329e-30	2.28329e-30	2.58403e-30	2.31481e-30	2.63111e-30	2.2835e-30	2.28329e-30	3.35241e-14	3.35235e-14	3.35235e-14	4.85743e-14	3.50617e-14	5.03971e-14
207	Lepanus	7.40023e-14	5.78714e-14	3.76565e-14	3.77361e-14	0.0422853	4.35371e-05	0.000144121	0.825805	9.04326e-06	1.49108e-05	2.36979e-07	3.71204e-14	8.78459e-26	7.26331e-26	7.26462e-26	3.88944e-14	4.37293e-17	1.83198e-16	2.32743e-13	9.85431e-18	7.84385e-18	2.51305e-19	7.25574e-26	6.28453e-26	6.28581e-26	3.36798e-14	3.79074e-17	1.58504e-16	1.85997e-13	8.5346e-18	6.88849e-18	2.17712e-19	6.27705e-26	3.68383e-26	1.98255e-14	2.24521e-17	9.28603e-17	1.4223e-13	5.02659e-18	4.39252e-18	1.2843e-19	3.67537e-26	1.98318e-14	2.24591e-17	9.28902e-17	1.42237e-13	5.02819e-18	4.39354e-18
208		5.58861e-16	4.81033e-16	3.59941e-16	3.60262e-16	8.8433e-15	1.22351e-05	0.000114133	0.9827	2.44014e-06	3.0227e-06	3.51498e-08	3.57788e-16	5.19046e-28	3.022e-28	3.02227e-28	2.11872e-27	4.04303e-18	6.98456e-17	1.92705e-13	8.58006e-19	7.0418e-19	1.34672e-20	3.02063e-28	1.11242e-28	1.11267e-28	1.87808e-27	1.51579e-18	2.5707e-17	1.67497e-13	3.17318e-19	3.10603e-19	4.99238e-21	1.11108e-28	6.73704e-29	1.24187e-27	9.22137e-19	1.55604e-17	1.11321e-13	1.92931e-19	1.92419e-19	3.03814e-21	6.72247e-29	1.24217e-27	9.22415e-19	1.55653e-17	1.11326e-13	1.92991e-19	1.92461e-19
209		7.01928e-16	6.38499e-16	5.83236e-16	5.8328e-16	2.43613e-15	7.14808e-16	0.000472015	0.977616	6.19428e-16	6.4921e-16	5.87022e-16	5.82942e-16	6.1284e-28	4.07096e-28	4.07106e-28	1.2983e-27	4.28359e-28	1.46507e-16	1.52688e-13	4.12454e-28	4.30198e-28	4.07761e-28	4.07045e-28	2.19174e-28	2.19182e-28	1.16837e-27	2.37259e-28	8.16896e-17	1.44406e-13	2.23983e-28	2.32589e-28	2.19736e-28	2.1913e-28	1.81135e-28	8.42157e-28	1.98463e-28	6.8519e-17	1.26439e-13	1.85809e-28	1.92282e-28	1.81666e-28	1.81085e-28	8.42182e-28	1.9847e-28	6.85215e-17	1.2644e-13	1.85816e-28	1.92289e-28
210		1.01342e-14	1.00529e-14	9.90375e-15	9.90377e-15	1.31393e-14	9.95326e-15	0.0179578	0.91168	9.91726e-15	9.94262e-15	9.90561e-15	9.90359e-15	2.65677e-27	2.26821e-27	2.26822e-27	3.97148e-27	2.27866e-27	2.42044e-15	6.68759e-14	2.27048e-27	2.29792e-27	2.26873e-27	2.26816e-27	1.92691e-27	1.92692e-27	3.74542e-27	1.93402e-27	2.05405e-15	6.56911e-14	1.92869e-27	1.93912e-27	1.92725e-27	1.92688e-27	1.8434e-27	3.15811e-27	1.84992e-27	1.96468e-15	6.31232e-14	1.84509e-27	1.85255e-27	1.84371e-27	1.84337e-27	3.15813e-27	1.84992e-27	1.96469e-15	6.31234e-14	1.8451e-27	1.85256e-27
211		2.82616e-16	2.62892e-16	2.40934e-16	2.40953e-16	9.99406e-16	7.52428e-05	0.00024413	0.98066	1.45526e-05	1.25364e-05	4.90228e-08	2.4081e-16	1.73292e-28	1.03617e-28	1.03619e-28	3.59574e-28	1.11849e-17	2.84406e-17	6.33352e-14	2.21282e-18	1.86217e-18	8.08271e-21	1.03608e-28	4.05339e-29	4.05352e-29	3.15802e-28	4.3781e-18	1.15854e-17	5.76172e-14	8.66121e-19	7.30956e-19	3.16403e-21	4.05269e-29	2.89777e-29	2.04285e-28	3.12985e-18	8.4436e-18	4.51332e-14	6.19386e-19	5.21024e-19	2.26277e-21	2.897e-29	2.04293e-28	3.12997e-18	8.44401e-18	4.51342e-14	6.1941e-19	5.21044e-19
212		5.2537e-17	5.00325e-17	4.88538e-17	4.88539e-17	7.28428e-17	7.73159e-17	1.07029e-16	1	5.55931e-17	5.38088e-17	4.904e-17	4.88526e-17	1.59038e-29	1.47594e-29	1.47594e-29	2.18776e-29	1.90823e-29	2.39016e-29	1.13613e-13	1.57584e-29	1.55725e-29	1.47852e-29	1.47592e-29	1.35317e-29	1.35318e-29	2.04451e-29	1.75192e-29	2.18232e-29	1.12469e-13	1.44664e-29	1.42434e-29	1.35569e-29	1.35316e-29	1.32106e-29	1.87104e-29	1.71363e-29	2.13433e-29	1.10525e-13	1.41334e-29	1.39038e-29	1.32356e-29	1.32104e-29	1.87105e-29	1.71364e-29	2.13433e-29	1.10525e-13	1.41334e-29	1.39039e-29
213		4.88873e-17	4.87739e-17	4.86307e-17	4.86307e-17	5.14815e-17	4.92478e-17	4.99252e-17	1	4.87733e-17	4.87512e-17	4.86347e-17	4.86306e-17	2.68842e-30	2.59045e-30	2.59045e-30	3.24577e-30	2.65208e-30	2.73102e-30	3.8083e-14	2.60355e-30	2.60795e-30	2.59078e-30	2.59044e-30	2.50602e-30	2.50602e-30	3.15183e-30	2.5528e-30	2.60945e-30	3.78406e-14	2.51629e-30	2.51733e-30	2.5063e-30	2.506e-30	2.47525e-30	3.0066e-30	2.51928e-30	2.57182e-30	3.74288e-14	2.485e-30	2.48547e-30	2.47553e-30	2.47524e-30	3.00661e-30	2.51928e-30	2.57183e-30	3.74289e-14	2.485e-30	2.48547e-30
214		9.54812e-18	9.54429e-18	9.53798e-18	9.53798e-18	9.66329e-18	9.5477e-18	9.55952e-18	1	9.5401e-18	9.54033e-18	9.53804e-18	9.53798e-18	3.77457e-31	3.76344e-31	3.76344e-31	3.85583e-31	3.76988e-31	3.7784e-31	2.20246e-14	3.76478e-31	3.76538e-31	3.76347e-31	3.76343e-31	3.75431e-31	3.75431e-31	3.84579e-31	3.75932e-31	3.76568e-31	2.20007e-14	3.75538e-31	3.75565e-31	3.75434e-31	3.75431e-31	3.74988e-31	3.82995e-31	3.75462e-31	3.76059e-31	2.19601e-14	3.75089e-31	3.75111e-31	3.74991e-31	3.74987e-31	3.82995e-31	3.75462e-31	3.76059e-31	2.19602e-14	3.75089e-31	3.75111e-31
215		1.49598e-15	1.48398e-15	1.4604e-15	1.4604e-15	1.97034e-15	0.00358626	0.0085005	0.958192	0.000693359	0.000563823	1.95412e-06	1.46037e-15	9.83541e-29	6.37741e-29	6.37749e-29	1.8254e-28	8.3838e-17	2.21699e-16	1.19479e-14	1.7538e-17	1.43317e-17	4.88788e-20	6.3772e-29	3.26874e-29	3.26877e-29	1.62023e-28	4.29276e-17	1.12831e-16	1.11936e-14	8.98924e-18	7.23932e-18	2.50506e-20	3.26864e-29	2.68093e-29	1.08732e-28	3.51939e-17	9.22865e-17	9.5469e-15	7.37273e-18	5.90361e-18	2.0545e-20	2.68082e-29	1.08734e-28	3.51941e-17	9.22872e-17	9.54703e-15	7.37279e-18	5.90365e-18
216	Monsoonal	4.25856e-14	4.23177e-14	4.21309e-14	4.21309e-14	4.56747e-14	0.139958	0.031445	0.667428	0.0183223	0.0168332	4.22997e-14	4.21308e-14	7.19829e-27	6.98543e-27	6.98544e-27	7.99765e-27	1.54342e-14	1.86527e-15	2.59145e-14	1.53357e-15	1.41168e-15	6.99929e-27	6.98542e-27	6.786e-27	6.786e-27	7.82232e-27	1.49924e-14	1.80306e-15	2.5764e-14	1.48973e-15	1.36953e-15	6.79959e-27	6.78599e-27	6.73696e-27	7.49925e-27	1.48839e-14	1.78904e-15	2.54539e-14	1.47899e-15	1.35932e-15	6.7505e-27	6.73695e-27	7.49926e-27	1.48839e-14	1.78904e-15	2.54539e-14	1.47899e-15	1.35932e-15
217		2.61271e-14	2.601e-14	2.5946e-14	2.5946e-14	2.71285e-14	0.0687699	0.0520029	0.693725	0.0363405	0.0337006	2.59979e-14	2.59459e-14	2.7402e-27	2.71025e-27	2.71025e-27	3.09697e-27	1.98223e-15	1.69697e-15	1.60817e-14	2.35318e-15	2.13622e-15	2.71351e-27	2.71024e-27	2.6749e-27	2.6749e-27	2.88949e-27	1.9531e-15	1.67112e-15	1.59231e-14	2.32242e-15	2.10737e-15	2.67813e-27	2.6749e-27	2.66583e-27	2.82715e-27	1.9459e-15	1.66505e-15	1.58248e-14	2.31455e-15	2.10006e-15	2.66906e-27	2.66583e-27	2.82715e-27	1.9459e-15	1.66505e-15	1.58248e-14	2.31455e-15	2.10006e-15
218		2.43532e-15	2.42887e-15	2.42573e-15	2.42573e-15	2.48368e-15	0.0614456	0.0944637	0.727743	0.00152443	3.64845e-14	2.42812e-15	2.42572e-15	1.18201e-28	1.17896e-28	1.17896e-28	1.22959e-28	1.18504e-15	3.59622e-15	1.92196e-14	3.83898e-17	1.21546e-27	1.17966e-28	1.17896e-28	1.17441e-28	1.17441e-28	1.20498e-28	1.17721e-15	3.58038e-15	1.9107e-14	3.82136e-17	1.20969e-27	1.1751e-28	1.17441e-28	1.17302e-28	1.19869e-28	1.1754e-15	3.57596e-15	1.90616e-14	3.81677e-17	1.2082e-27	1.17372e-28	1.17302e-28	1.19869e-28	1.1754e-15	3.57596e-15	1.90616e-14	3.81677e-17	1.2082e-27
219		9.69853e-15	9.69038e-15	9.68788e-15	9.68788e-15	9.73329e-15	3.49945e-13	0.148465	0.769629	3.52998e-14	2.37602e-14	9.68878e-15	9.68788e-15	1.29263e-27	1.29234e-27	1.29234e-27	1.29788e-27	2.57244e-26	7.66011e-15	3.2266e-14	3.18171e-27	2.37329e-27	1.29241e-27	1.29234e-27	1.29158e-27	1.29158e-27	1.29578e-27	2.57092e-26	7.65616e-15	3.22434e-14	3.17846e-27	2.3702e-27	1.29165e-27	1.29158e-27	1.29137e-27	1.29529e-27	2.57056e-26	7.65506e-15	3.22358e-14	3.17769e-27	2.36947e-27	1.29144e-27	1.29137e-27	1.29529e-27	2.57056e-26	7.65506e-15	3.22358e-14	3.17769e-27	2.36947e-27
220		1.44903e-15	1.44833e-15	1.44802e-15	1.44802e-15	1.45372e-15	0.0923977	0.10198	0.551874	0.00148996	4.00319e-15	1.44819e-15	1.44802e-15	1.01295e-28	1.01272e-28	1.01272e-28	1.01671e-28	2.86946e-15	2.24824e-15	1.58744e-14	5.00099e-17	2.02428e-28	1.01278e-28	1.01272e-28	1.0123e-28	1.0123e-28	1.01537e-28	2.86366e-15	2.24719e-15	1.58669e-14	4.99476e-17	2.02168e-28	1.01236e-28	1.0123e-28	1.01215e-28	1.01499e-28	2.8622e-15	2.24687e-15	1.58638e-14	4.99305e-17	2.02098e-28	1.01221e-28	1.01215e-28	1.01499e-28	2.8622e-15	2.24687e-15	1.58638e-14	4.99305e-17	2.02098e-28
221		1.01111e-15	1.01096e-15	1.01091e-15	1.01091e-15	1.01178e-15	0.547098	1.72964e-14	0.262856	2.35337e-15	1.19335e-15	1.01092e-15	1.01091e-15	3.3334e-29	3.33319e-29	3.33319e-29	3.3369e-29	1.54314e-14	4.09281e-28	2.90803e-15	5.8427e-29	3.93791e-29	3.33322e-29	3.33319e-29	3.33271e-29	3.33271e-29	3.33575e-29	1.54197e-14	4.0921e-28	2.90752e-15	5.84044e-29	3.93588e-29	3.33273e-29	3.33271e-29	3.33255e-29	3.33544e-29	1.54169e-14	4.09188e-28	2.90731e-15	5.83984e-29	3.93535e-29	3.33258e-29	3.33255e-29	3.33544e-29	1.54169e-14	4.09188e-28	2.90731e-15	5.83984e-29	3.93535e-29
222		3.92032e-16	3.91997e-16	3.91987e-16	3.91987e-16	3.92175e-16	0.51579	3.1877e-15	0.275483	6.19808e-16	4.25631e-16	3.91989e-16	3.91987e-16	1.02871e-29	1.02867e-29	1.02867e-29	1.02932e-29	4.35103e-15	5.42648e-29	2.31708e-15	1.37635e-29	1.09748e-29	1.02868e-29	1.02867e-29	1.02857e-29	1.02857e-29	1.0291e-29	4.35023e-15	5.42585e-29	2.3167e-15	1.37584e-29	1.097e-29	1.02857e-29	1.02857e-29	1.02854e-29	1.02905e-29	4.35003e-15	5.42569e-29	2.3166e-15	1.37573e-29	1.09689e-29	1.02855e-29	1.02854e-29	1.02905e-29	4.35003e-15	5.42569e-29	2.3166e-15	1.37573e-29	1.09689e-29
223		3.9539e-17	3.95381e-17	3.95378e-17	3.95378e-17	3.9543e-17	1	7.35342e-17	2.03122e-15	4.26019e-17	4.03125e-17	3.95378e-17	3.95378e-17	7.40325e-31	7.40319e-31	7.40319e-31	7.40425e-31	1.2866e-14	1.13843e-30	2.19933e-29	7.77763e-31	7.53087e-31	7.40319e-31	7.40319e-31	7.40303e-31	7.40303e-31	7.40396e-31	1.28648e-14	1.13837e-30	2.19927e-29	7.7771e-31	7.53037e-31	7.40304e-31	7.40303e-31	7.40298e-31	7.40388e-31	1.28645e-14	1.13836e-30	2.19925e-29	7.77696e-31	7.53024e-31	7.40299e-31	7.40298e-31	7.40388e-31	1.28645e-14	1.13836e-30	2.19925e-29	7.77696e-31	7.53024e-31
224		1.48898e-15	1.4885e-15	1.48835e-15	1.48835e-15	1.49105e-15	0.0222789	0.20141	0.547666	0.00255305	2.11875e-15	1.48838e-15	1.48835e-15	6.05352e-29	6.05264e-29	6.05264e-29	6.06909e-29	1.14516e-16	4.58734e-15	4.78811e-15	3.78289e-17	8.11411e-29	6.05275e-29	6.05264e-29	6.05034e-29	6.05034e-29	6.0627e-29	1.14429e-16	4.585e-15	4.7855e-15	3.77613e-17	8.09926e-29	6.05045e-29	6.05034e-29	6.04971e-29	6.06122e-29	1.14407e-16	4.58443e-15	4.78476e-15	3.7746e-17	8.09591e-29	6.04982e-29	6.04971e-29	6.06122e-29	1.14407e-16	4.58443e-15	4.78476e-15	3.7746e-17	8.09591e-29
225		6.08489e-16	6.08407e-16	6.08383e-16	6.08383e-16	6.0882e-16	0.0256122	0.151996	0.611895	0.00498451	7.07074e-16	6.08389e-16	6.08383e-16	5.44646e-30	5.44582e-30	5.44582e-30	5.45828e-30	5.40191e-17	3.80392e-16	5.07812e-15	4.36277e-17	6.87253e-30	5.4459e-30	5.44582e-30	5.44391e-30	5.44391e-30	5.45327e-30	5.39766e-17	3.80245e-16	5.07478e-15	4.35573e-17	6.86121e-30	5.44398e-30	5.44391e-30	5.44344e-30	5.45219e-30	5.39668e-17	3.8021e-16	5.07391e-15	4.35425e-17	6.85884e-30	5.44351e-30	5.44344e-30	5.45219e-30	5.39668e-17	3.8021e-16	5.07391e-15	4.35425e-17	6.85884e-30
226		1.71786e-15	1.71769e-15	1.71765e-15	1.71765e-15	1.71842e-15	0.0428108	0.202443	0.622974	1.5005e-14	1.77245e-15	1.71765e-15	1.71765e-15	7.8146e-30	7.81424e-30	7.81424e-30	7.82103e-30	7.76692e-17	6.61722e-16	7.84363e-16	4.97872e-29	8.24249e-30	7.81425e-30	7.81424e-30	7.81304e-30	7.81304e-30	7.81868e-30	7.75637e-17	6.61321e-16	7.84135e-16	4.97587e-29	8.23779e-30	7.81305e-30	7.81304e-30	7.81275e-30	7.81815e-30	7.75397e-17	6.61228e-16	7.84075e-16	4.97527e-29	8.23674e-30	7.81276e-30	7.81275e-30	7.81815e-30	7.75397e-17	6.61228e-16	7.84075e-16	4.97527e-29	8.23674e-30
227		4.92133e-15	4.92124e-15	4.92122e-15	4.92122e-15	4.92163e-15	0.153522	2.4518e-13	0.804193	1.02055e-14	4.95204e-15	4.92122e-15	4.92122e-15	5.26323e-29	5.26319e-29	5.26319e-29	5.26395e-29	8.94578e-16	1.56544e-27	3.26079e-15	9.00713e-29	5.31149e-29	5.26319e-29	5.26319e-29	5.26304e-29	5.26304e-29	5.26371e-29	8.94014e-16	1.56528e-27	3.26007e-15	9.00476e-29	5.31106e-29	5.26304e-29	5.26304e-29	5.26301e-29	5.26365e-29	8.93889e-16	1.56524e-27	3.2599e-15	9.00427e-29	5.31097e-29	5.26301e-29	5.26301e-29	5.26365e-29	8.93889e-16	1.56524e-27	3.2599e-15	9.00427e-29	5.31097e-29
228		3.40823e-16	3.3601e-16	3.33597e-16	3.33597e-16	3.80534e-16	0.000150955	0.0130835	0.956983	0.000352727	0.000213065	8.10752e-06	3.33595e-16	5.21453e-30	4.51826e-30	4.51828e-30	1.08674e-29	1.5049e-18	8.04835e-17	5.91953e-15	1.70614e-18	9.78156e-19	8.12905e-20	4.51821e-30	3.83477e-30	3.83477e-30	7.30524e-30	1.14123e-18	6.40633e-17	5.57313e-15	1.37059e-18	7.80483e-19	6.89891e-20	3.83474e-30	3.70135e-30	5.92e-30	1.07212e-18	6.09208e-17	5.26256e-15	1.30617e-18	7.42687e-19	6.65879e-20	3.70132e-30	5.92004e-30	1.07212e-18	6.09209e-17	5.26258e-15	1.30617e-18	7.42688e-19
229		2.91184e-15	2.90732e-15	2.90435e-15	2.90435e-15	2.9606e-15	0.000499175	0.294362	0.531864	0.000111601	0.000105261	9.70618e-05	2.90435e-15	1.45092e-28	1.43945e-28	1.43945e-28	1.54824e-28	1.88058e-17	1.21248e-14	1.0228e-14	3.8379e-18	3.71746e-18	3.52054e-18	1.43945e-28	1.42796e-28	1.42797e-28	1.49491e-28	1.79666e-17	1.19477e-14	1.01659e-14	3.78468e-18	3.66518e-18	3.49245e-18	1.42796e-28	1.42517e-28	1.47309e-28	1.77981e-17	1.19089e-14	1.01104e-14	3.77298e-18	3.65372e-18	3.48561e-18	1.42517e-28	1.47309e-28	1.77981e-17	1.19089e-14	1.01104e-14	3.77298e-18	3.65372e-18
230		5.69469e-15	5.6923e-15	5.69094e-15	5.69094e-15	5.71622e-15	0.0086735	0.675604	0.2321	6.09024e-15	6.068e-15	6.02746e-15	5.69094e-15	5.77674e-28	5.77322e-28	5.77322e-28	5.81536e-28	4.50017e-16	4.13266e-14	6.41018e-15	5.99453e-28	5.98184e-28	5.95449e-28	5.77322e-28	5.76919e-28	5.76919e-28	5.79996e-28	4.48564e-16	4.12639e-14	6.40551e-15	5.98811e-28	5.97544e-28	5.95036e-28	5.76919e-28	5.76774e-28	5.79383e-28	4.48232e-16	4.12482e-14	6.40149e-15	5.9862e-28	5.97353e-28	5.94889e-28	5.76774e-28	5.79383e-28	4.48232e-16	4.12482e-14	6.40149e-15	5.9862e-28	5.97353e-28
231		7.41562e-16	7.41474e-16	7.41431e-16	7.41431e-16	7.42218e-16	2.43218e-15	1	3.66741e-14	7.44967e-16	7.44762e-16	7.44269e-16	7.41431e-16	1.08108e-28	1.08101e-28	1.08101e-28	1.08219e-28	2.47942e-28	9.04056e-14	2.9863e-27	1.08401e-28	1.08383e-28	1.08334e-28	1.08101e-28	1.08089e-28	1.08089e-28	1.08186e-28	2.47854e-28	9.03888e-14	2.98603e-27	1.08387e-28	1.08369e-28	1.08322e-28	1.08089e-28	1.08084e-28	1.08175e-28	2.47833e-28	9.03839e-14	2.98581e-27	1.08381e-28	1.08364e-28	1.08317e-28	1.08084e-28	1.08175e-28	2.47833e-28	9.03839e-14	2.98581e-27	1.08381e-28	1.08364e-28
232		8.39836e-15	8.39676e-15	8.39606e-15	8.39606e-15	8.40867e-15	0.0307479	0.601501	0.242644	8.56318e-15	8.55302e-15	8.53481e-15	8.39606e-15	8.78995e-28	8.78887e-28	8.78887e-28	8.80926e-28	2.1342e-15	1.71421e-14	6.9854e-15	8.89224e-28	8.88555e-28	8.87292e-28	8.78887e-28	8.7869e-28	8.7869e-28	8.79996e-28	2.133e-15	1.71362e-14	6.98261e-15	8.8898e-28	8.88311e-28	8.87094e-28	8.7869e-28	8.78627e-28	8.7978e-28	2.13272e-15	1.71347e-14	6.98132e-15	8.88908e-28	8.88239e-28	8.87031e-28	8.78627e-28	8.7978e-28	2.13272e-15	1.71347e-14	6.98132e-15	8.88908e-28	8.88239e-28
233		5.78336e-15	5.78265e-15	5.78238e-15	5.78238e-15	5.78725e-15	1.57537e-13	0.638253	0.266561	5.84037e-15	5.83683e-15	5.83048e-15	5.78238e-15	4.05898e-28	4.05875e-28	4.05875e-28	4.06345e-28	7.83118e-27	1.59385e-14	6.89864e-15	4.08402e-28	4.08243e-28	4.07949e-28	4.05875e-28	4.05819e-28	4.05819e-28	4.06149e-28	7.82933e-27	1.59351e-14	6.8961e-15	4.0834e-28	4.08181e-28	4.07893e-28	4.05819e-28	4.05802e-28	4.06107e-28	7.8289e-27	1.59344e-14	6.89536e-15	4.08323e-28	4.08164e-28	4.07877e-28	4.05802e-28	4.06107e-28	7.8289e-27	1.59344e-14	6.89536e-15	4.08323e-28	4.08164e-28
234		4.96112e-15	4.95553e-15	4.95306e-15	4.95306e-15	4.99856e-15	1.02112e-14	0.285638	0.505413	0.000232714	0.00022801	0.000221825	4.95306e-15	6.31965e-28	6.313e-28	6.313e-28	6.42602e-28	1.02544e-27	1.22716e-14	1.60436e-14	1.69e-17	1.67089e-17	1.64398e-17	6.313e-28	6.3035e-28	6.3035e-28	6.36755e-28	1.01892e-27	1.22357e-14	1.60174e-14	1.68649e-17	1.6674e-17	1.64151e-17	6.3035e-28	6.30068e-28	6.35313e-28	1.01755e-27	1.22277e-14	1.60033e-14	1.68557e-17	1.66648e-17	1.64077e-17	6.30068e-28	6.35313e-28	1.01755e-27	1.22277e-14	1.60033e-14	1.68557e-17	1.66648e-17
235		3.17948e-15	3.1788e-15	3.17861e-15	3.17861e-15	3.18181e-15	3.3568e-15	0.0150526	0.864665	0.00290609	0.00290193	0.00289635	3.17861e-15	1.31801e-28	1.31758e-28	1.31758e-28	1.32785e-28	1.38372e-28	2.42421e-16	3.02832e-14	9.82977e-17	9.81394e-17	9.78968e-17	1.31758e-28	1.31669e-28	1.31669e-28	1.3212e-28	1.38101e-28	2.42111e-16	3.01481e-14	9.82138e-17	9.80559e-17	9.78308e-17	1.31669e-28	1.3165e-28	1.31999e-28	1.3805e-28	2.42042e-16	3.01126e-14	9.81967e-17	9.80389e-17	9.78167e-17	1.3165e-28	1.31999e-28	1.3805e-28	2.42042e-16	3.01126e-14	9.81967e-17	9.80389e-17
236		1.8026e-15	1.80217e-15	1.80206e-15	1.80206e-15	1.80387e-15	1.82416e-15	4.42828e-14	0.677025	0.00658815	0.00658619	0.00658282	1.80206e-15	2.33084e-28	2.33068e-28	2.33068e-28	2.33406e-28	2.34715e-28	3.12591e-27	2.42081e-14	8.19917e-16	8.19781e-16	8.19508e-16	2.33068e-28	2.33022e-28	2.33022e-28	2.33233e-28	2.34631e-28	3.12518e-27	2.42016e-14	8.19736e-16	8.19601e-16	8.19346e-16	2.33022e-28	2.33011e-28	2.33199e-28	2.34613e-28	3.12501e-27	2.41999e-14	8.19694e-16	8.19559e-16	8.19307e-16	2.33011e-28	2.33199e-28	2.34613e-28	3.12501e-27	2.41999e-14	8.19694e-16	8.19559e-16
237		4.34637e-16	4.34539e-16	4.34515e-16	4.34515e-16	4.34934e-16	4.43764e-16	0.0127838	0.903709	2.48576e-15	2.48278e-15	2.47833e-15	4.34515e-16	2.90853e-29	2.90808e-29	2.90808e-29	2.91812e-29	2.95035e-29	3.0073e-16	3.15249e-14	1.10119e-28	1.09995e-28	1.09806e-28	2.90808e-29	2.90704e-29	2.90704e-29	2.91213e-29	2.94779e-29	3.00495e-16	3.1494e-14	1.10092e-28	1.09969e-28	1.09784e-28	2.90704e-29	2.90681e-29	2.91101e-29	2.9473e-29	3.0044e-16	3.14859e-14	1.10086e-28	1.09963e-28	1.09779e-28	2.90681e-29	2.91101e-29	2.9473e-29	3.0044e-16	3.14859e-14	1.10086e-28	1.09963e-28
238		7.11044e-16	7.11014e-16	7.11007e-16	7.11007e-16	7.11133e-16	7.1199e-16	0.032168	0.806019	8.47789e-16	8.47588e-16	8.47267e-16	7.11007e-16	5.82639e-29	5.82631e-29	5.82631e-29	5.82794e-29	5.83163e-29	1.09819e-15	1.88714e-14	6.4283e-29	6.42741e-29	6.42588e-29	5.82631e-29	5.82608e-29	5.82608e-29	5.82713e-29	5.83123e-29	1.09786e-15	1.88702e-14	6.42798e-29	6.42709e-29	6.4256e-29	5.82608e-29	5.82602e-29	5.82697e-29	5.83114e-29	1.09778e-15	1.88699e-14	6.42791e-29	6.42702e-29	6.42553e-29	5.82602e-29	5.82697e-29	5.83114e-29	1.09778e-15	1.88699e-14	6.42791e-29	6.42702e-29
239		1.95078e-16	1.93568e-16	1.93058e-16	1.93058e-16	2.0231e-16	5.32053e-16	4.60973e-15	0.991208	0.000860371	0.000561806	1.39348e-05	1.93058e-16	3.18396e-30	3.12365e-30	3.12365e-30	4.12962e-30	6.84773e-30	4.88626e-29	8.00658e-15	5.8398e-18	4.18094e-18	1.01779e-19	3.12365e-30	3.05049e-30	3.05049e-30	3.47569e-30	6.36135e-30	4.62293e-29	7.80514e-15	5.6335e-18	4.0311e-18	9.93908e-20	3.05049e-30	3.0353e-30	3.32354e-30	6.26998e-30	4.57235e-29	7.70233e-15	5.59274e-18	4.00157e-18	9.88954e-20	3.0353e-30	3.32354e-30	6.26999e-30	4.57235e-29	7.70234e-15	5.59274e-18	4.00158e-18
240		1.391e-16	1.38918e-16	1.38854e-16	1.38854e-16	1.40019e-16	1.60779e-16	4.19969e-16	1	5.04726e-16	3.70833e-16	1.46056e-16	1.38854e-16	7.27239e-30	7.25721e-30	7.25721e-30	7.51317e-30	8.05635e-30	1.65024e-29	2.55275e-14	1.91571e-29	1.48733e-29	7.4854e-30	7.25721e-30	7.23695e-30	7.23695e-30	7.35946e-30	7.96019e-30	1.61532e-29	2.542e-14	1.90378e-29	1.47834e-29	7.46402e-30	7.23695e-30	7.2321e-30	7.3232e-30	7.94133e-30	1.60848e-29	2.53669e-14	1.90135e-29	1.47649e-29	7.45894e-30	7.2321e-30	7.3232e-30	7.94134e-30	1.60848e-29	2.53669e-14	1.90135e-29	1.47649e-29
241		1.26662e-16	1.26648e-16	1.26641e-16	1.26641e-16	1.26767e-16	1.27264e-16	1.33669e-16	1	1.33809e-16	1.31212e-16	1.26781e-16	1.26641e-16	2.70751e-29	2.7073e-29	2.7073e-29	2.71091e-29	2.716e-29	2.79622e-29	9.64707e-14	2.79055e-29	2.76054e-29	2.70892e-29	2.70729e-29	2.70697e-29	2.70697e-29	2.70939e-29	2.715e-29	2.79333e-29	9.64494e-14	2.78984e-29	2.75992e-29	2.70859e-29	2.70697e-29	2.70685e-29	2.709e-29	2.71477e-29	2.79271e-29	9.64389e-14	2.78964e-29	2.75975e-29	2.70847e-29	2.70685e-29	2.709e-29	2.71477e-29	2.79271e-29	9.64389e-14	2.78964e-29	2.75975e-29
242		6.37228e-17	6.37153e-17	6.37118e-17	6.37118e-17	6.37752e-17	6.40256e-17	6.72477e-17	1	6.73182e-17	6.60116e-17	6.37826e-17	6.37118e-17	1.41557e-29	1.41549e-29	1.41549e-29	1.41694e-29	1.41965e-29	1.45935e-29	1.03284e-13	1.45775e-29	1.44249e-29	1.41631e-29	1.41549e-29	1.41535e-29	1.41535e-29	1.41641e-29	1.41929e-29	1.45835e-29	1.03269e-13	1.45748e-29	1.44225e-29	1.41617e-29	1.41535e-29	1.4153e-29	1.41626e-29	1.4192e-29	1.45814e-29	1.03261e-13	1.4574e-29	1.44218e-29	1.41612e-29	1.4153e-29	1.41626e-29	1.4192e-29	1.45814e-29	1.03261e-13	1.4574e-29	1.44218e-29
243		3.52766e-15	3.52539e-15	3.52438e-15	3.52438e-15	3.54289e-15	3.74186e-15	6.22679e-15	0.907719	0.0220087	0.0146058	0.000375477	3.52438e-15	2.01876e-28	2.01587e-28	2.01587e-28	2.06275e-28	2.11132e-28	3.00455e-28	7.14399e-15	6.24861e-16	5.1921e-16	5.94106e-18	2.01587e-28	2.0123e-28	2.0123e-28	2.03495e-28	2.09348e-28	2.94515e-28	7.12316e-15	6.23166e-16	5.17792e-16	5.93049e-18	2.0123e-28	2.0114e-28	2.02815e-28	2.08993e-28	2.93329e-28	7.11254e-15	6.22779e-16	5.17469e-16	5.92783e-18	2.0114e-28	2.02815e-28	2.08993e-28	2.93329e-28	7.11254e-15	6.22779e-16	5.17469e-16
244		8.39666e-15	8.39569e-15	8.39523e-15	8.39523e-15	8.40351e-15	8.42266e-15	8.67674e-15	4.57714e-13	0.93254	0.0241392	9.16545e-15	8.39523e-15	1.56315e-27	1.56303e-27	1.56303e-27	1.56498e-27	1.56671e-27	1.59677e-27	4.60804e-26	1.45876e-13	2.03455e-15	1.63637e-27	1.56303e-27	1.56285e-27	1.56285e-27	1.56422e-27	1.56619e-27	1.59531e-27	4.60716e-26	1.45855e-13	2.03425e-15	1.63618e-27	1.56285e-27	1.56278e-27	1.56401e-27	1.56606e-27	1.59499e-27	4.60672e-26	1.45848e-13	2.03416e-15	1.63612e-27	1.56278e-27	1.56401e-27	1.56606e-27	1.59499e-27	4.60672e-26	1.45848e-13	2.03416e-15
245		9.64611e-16	9.64549e-16	9.64521e-16	9.64521e-16	9.65024e-16	9.66124e-16	9.80914e-16	2.67508e-14	0.840418	0.0401142	1.00857e-15	9.64521e-16	6.84188e-29	6.84172e-29	6.84172e-29	6.84465e-29	6.84875e-29	6.91102e-29	1.09103e-27	1.58753e-14	1.42668e-15	7.01452e-29	6.84172e-29	6.84139e-29	6.84139e-29	6.84384e-29	6.84819e-29	6.90973e-29	1.09097e-27	1.58746e-14	1.42661e-15	7.01419e-29	6.84139e-29	6.84127e-29	6.84361e-29	6.84802e-29	6.90942e-29	1.09094e-27	1.58744e-14	1.42658e-15	7.01407e-29	6.84127e-29	6.84361e-29	6.84802e-29	6.90942e-29	1.09094e-27	1.58744e-14	1.42658e-15
246		1.83544e-17	1.83539e-17	1.83536e-17	1.83536e-17	1.8358e-17	1.83674e-17	1.84948e-17	2.37013e-16	1	5.33901e-16	1.87266e-17	1.83536e-17	3.0145e-31	3.01446e-31	3.01446e-31	3.01525e-31	3.01633e-31	3.03312e-31	2.96371e-30	1.30263e-14	7.0996e-30	3.05938e-31	3.01446e-31	3.01437e-31	3.01437e-31	3.01504e-31	3.01619e-31	3.03281e-31	2.96357e-30	1.30259e-14	7.09936e-30	3.05929e-31	3.01437e-31	3.01433e-31	3.01498e-31	3.01615e-31	3.03273e-31	2.96352e-30	1.30257e-14	7.09928e-30	3.05925e-31	3.01433e-31	3.01498e-31	3.01615e-31	3.03273e-31	2.96352e-30	1.30257e-14	7.09928e-30
247		1.82211e-16	1.82141e-16	1.82112e-16	1.82112e-16	1.82631e-16	1.87742e-16	2.51985e-16	0.948936	0.000621789	0.0193263	0.000730198	1.82112e-16	1.56653e-30	1.56521e-30	1.56521e-30	1.59071e-30	1.61173e-30	2.06613e-30	4.20398e-15	5.83892e-18	1.49269e-16	5.24055e-18	1.56521e-30	1.56328e-30	1.56328e-30	1.57506e-30	1.6038e-30	2.03665e-30	4.19214e-15	5.82777e-18	1.48997e-16	5.23405e-18	1.56328e-30	1.56281e-30	1.57171e-30	1.60226e-30	2.03109e-30	4.18755e-15	5.82522e-18	1.48936e-16	5.23248e-18	1.56281e-30	1.57171e-30	1.60226e-30	2.03109e-30	4.18755e-15	5.82522e-18	1.48936e-16
248		6.51038e-16	6.50989e-16	6.50972e-16	6.50972e-16	6.51288e-16	6.52661e-16	6.70722e-16	0.939094	0.000718224	0.0275135	0.000445177	6.50972e-16	2.64648e-29	2.64633e-29	2.64633e-29	2.64925e-29	2.6515e-29	2.69969e-29	1.55076e-14	1.94885e-17	7.01756e-16	1.27291e-17	2.64633e-29	2.64606e-29	2.64606e-29	2.64774e-29	2.65073e-29	2.69708e-29	1.5503e-14	1.94704e-17	7.01615e-16	1.27276e-17	2.64606e-29	2.64599e-29	2.64742e-29	2.65057e-29	2.69658e-29	1.55013e-14	1.9466e-17	7.01582e-16	1.27272e-17	2.64599e-29	2.64742e-29	2.65057e-29	2.69658e-29	1.55013e-14	1.9466e-17	7.01582e-16
249		8.52961e-15	8.52952e-15	8.52949e-15	8.52949e-15	8.53009e-15	8.53113e-15	8.5461e-15	0.892669	0.00665853	0.0296731	0.00600778	8.52949e-15	8.98571e-28	8.98566e-28	8.98566e-28	8.98668e-28	8.98722e-28	8.99997e-28	3.02964e-14	6.61048e-16	2.01325e-15	6.06236e-16	8.98566e-28	8.98554e-28	8.98554e-28	8.98627e-28	8.98698e-28	8.99929e-28	3.02952e-14	6.60954e-16	2.0132e-15	6.06227e-16	8.98554e-28	8.98551e-28	8.98617e-28	8.98692e-28	8.99915e-28	3.02947e-14	6.6093e-16	2.01318e-15	6.06224e-16	8.98551e-28	8.98617e-28	8.98692e-28	8.99915e-28	3.02947e-14	6.6093e-16	2.01318e-15
250		7.23827e-15	7.23811e-15	7.23806e-15	7.23806e-15	7.23892e-15	7.2398e-15	7.25511e-15	0.920246	2.08725e-14	0.0481689	1.41078e-14	7.23806e-15	4.57704e-28	4.577e-28	4.577e-28	4.57786e-28	4.5781e-28	4.58674e-28	1.97395e-14	9.85183e-28	1.31095e-15	7.24105e-28	4.577e-28	4.5769e-28	4.5769e-28	4.5775e-28	4.5779e-28	4.58616e-28	1.97383e-14	9.85003e-28	1.3109e-15	7.24086e-28	4.5769e-28	4.57687e-28	4.57742e-28	4.57785e-28	4.58604e-28	1.97379e-14	9.84958e-28	1.31089e-15	7.24081e-28	4.57687e-28	4.57742e-28	4.57785e-28	4.58604e-28	1.97379e-14	9.84958e-28	1.31089e-15
251		1.42509e-16	1.42508e-16	1.42508e-16	1.42508e-16	1.42513e-16	1.42518e-16	1.42612e-16	1	2.16211e-16	5.83578e-15	1.79401e-16	1.42508e-16	1.83069e-29	1.83069e-29	1.83069e-29	1.83073e-29	1.83076e-29	1.83145e-29	6.51132e-14	2.3306e-29	4.05497e-28	2.0803e-29	1.83069e-29	1.83068e-29	1.83068e-29	1.83072e-29	1.83075e-29	1.83143e-29	6.51128e-14	2.33057e-29	4.05496e-28	2.0803e-29	1.83068e-29	1.83068e-29	1.83071e-29	1.83075e-29	1.83143e-29	6.51127e-14	2.33057e-29	4.05495e-28	2.08029e-29	1.83068e-29	1.83071e-29	1.83075e-29	1.83143e-29	6.51127e-14	2.33057e-29	4.05495e-28
252		1.83184e-15	1.83171e-15	1.83166e-15	1.83166e-15	1.83248e-15	1.83523e-15	1.87226e-15	0.908435	3.07454e-05	0.0310514	0.0095669	1.83166e-15	6.24444e-29	6.24397e-29	6.24397e-29	6.25331e-29	6.25585e-29	6.35586e-29	4.42824e-15	2.95201e-19	4.47154e-16	1.67545e-16	6.24397e-29	6.24314e-29	6.24314e-29	6.24818e-29	6.25328e-29	6.34687e-29	4.42643e-15	2.94857e-19	4.47027e-16	1.67523e-16	6.24314e-29	6.24291e-29	6.24709e-29	6.25275e-29	6.34516e-29	4.42573e-15	2.94772e-19	4.46997e-16	1.67517e-16	6.24291e-29	6.24709e-29	6.25275e-29	6.34516e-29	4.42573e-15	2.94772e-19	4.46997e-16
253		1.31599e-14	1.31598e-14	1.31598e-14	1.31598e-14	1.31606e-14	1.31616e-14	1.31769e-14	7.29705e-13	1.51918e-14	0.443511	0.403045	1.31598e-14	1.87341e-27	1.8734e-27	1.8734e-27	1.87358e-27	1.87364e-27	1.87542e-27	5.76029e-26	2.06934e-27	5.90134e-14	5.59868e-14	1.8734e-27	1.87338e-27	1.87338e-27	1.87351e-27	1.8736e-27	1.87529e-27	5.76009e-26	2.06908e-27	5.90122e-14	5.59862e-14	1.87338e-27	1.87338e-27	1.87349e-27	1.87359e-27	1.87527e-27	5.76001e-26	2.06901e-27	5.90119e-14	5.5986e-14	1.87338e-27	1.87349e-27	1.87359e-27	1.87527e-27	5.76001e-26	2.06901e-27	5.90119e-14
254		1.89199e-16	1.89194e-16	1.89192e-16	1.89192e-16	1.89225e-16	1.89327e-16	1.90729e-16	0.95891	2.88163e-05	0.00609517	0.000166043	1.89192e-16	3.22552e-30	3.22546e-30	3.22546e-30	3.22663e-30	3.22746e-30	3.24608e-30	8.268e-15	2.33036e-19	2.82892e-17	1.22543e-18	3.22546e-30	3.22534e-30	3.22534e-30	3.22606e-30	3.22717e-30	3.24513e-30	8.26655e-15	2.32949e-19	2.82863e-17	1.22537e-18	3.22534e-30	3.22531e-30	3.22594e-30	3.22711e-30	3.24494e-30	8.26606e-15	2.32928e-19	2.82856e-17	1.22535e-18	3.22531e-30	3.22594e-30	3.22711e-30	3.24494e-30	8.26606e-15	2.32928e-19	2.82856e-17
255		5.33195e-17	5.33191e-17	5.3319e-17	5.3319e-17	5.3321e-17	5.33229e-17	5.33579e-17	1	6.44486e-17	9.112e-16	1.09814e-16	5.3319e-17	7.32086e-30	7.32085e-30	7.32085e-30	7.32103e-30	7.32115e-30	7.32383e-30	5.4367e-14	8.11332e-30	6.7981e-29	1.13626e-29	7.32085e-30	7.32081e-30	7.32081e-30	7.32098e-30	7.32112e-30	7.32376e-30	5.43667e-14	8.11321e-30	6.79807e-29	1.13625e-29	7.32081e-30	7.32081e-30	7.32097e-30	7.32111e-30	7.32375e-30	5.43666e-14	8.11318e-30	6.79806e-29	1.13625e-29	7.32081e-30	7.32097e-30	7.32111e-30	7.32375e-30	5.43666e-14	8.11318e-30	6.79806e-29
256		4.58592e-17	4.58591e-17	4.58591e-17	4.58591e-17	4.58593e-17	4.58594e-17	4.58618e-17	1	4.62476e-17	6.53363e-17	4.79599e-17	4.58591e-17	1.21351e-30	1.21351e-30	1.21351e-30	1.21353e-30	1.21353e-30	1.2137e-30	2.17108e-14	1.23323e-30	1.84837e-30	1.32235e-30	1.21351e-30	1.21351e-30	1.21351e-30	1.21352e-30	1.21353e-30	1.21369e-30	2.17107e-14	1.23322e-30	1.84835e-30	1.32235e-30	1.21351e-30	1.21351e-30	1.21352e-30	1.21353e-30	1.21369e-30	2.17107e-14	1.23322e-30	1.84834e-30	1.32234e-30	1.21351e-30	1.21352e-30	1.21353e-30	1.21369e-30	2.17107e-14	1.23322e-30	1.84834e-30
257		8.33272e-18	8.33272e-18	8.33272e-18	8.33272e-18	8.33272e-18	8.33273e-18	8.3328e-18	1	8.34129e-18	8.52305e-18	8.38201e-18	8.33272e-18	3.09739e-31	3.09739e-31	3.09739e-31	3.0974e-31	3.0974e-31	3.09743e-31	1.98437e-14	3.10039e-31	3.15664e-31	3.11454e-31	3.09739e-31	3.09739e-31	3.09739e-31	3.0974e-31	3.0974e-31	3.09743e-31	1.98437e-14	3.10039e-31	3.15664e-31	3.11454e-31	3.09739e-31	3.09739e-31	3.0974e-31	3.0974e-31	3.09743e-31	1.98437e-14	3.10039e-31	3.15664e-31	3.11454e-31	3.09739e-31	3.0974e-31	3.0974e-31	3.09743e-31	1.98437e-14	3.10039e-31	3.15664e-31
258		7.91783e-16	7.9178e-16	7.91779e-16	7.91779e-16	7.91797e-16	7.91826e-16	7.92267e-16	0.934724	0.000251459	0.0102348	0.000384333	7.91779e-16	2.60757e-29	2.60756e-29	2.60756e-29	2.60768e-29	2.60772e-29	2.60896e-29	1.21958e-14	6.96184e-18	1.5093e-16	9.34917e-18	2.60756e-29	2.60755e-29	2.60755e-29	2.60763e-29	2.60769e-29	2.60888e-29	1.21955e-14	6.96141e-18	1.50921e-16	9.3489e-18	2.60755e-29	2.60755e-29	2.60762e-29	2.60769e-29	2.60886e-29	1.21954e-14	6.96131e-18	1.50919e-16	9.34882e-18	2.60755e-29	2.60762e-29	2.60769e-29	2.60886e-29	1.21954e-14	6.96131e-18	1.50919e-16
259		3.73859e-17	3.73858e-17	3.73857e-17	3.73857e-17	3.73864e-17	3.73867e-17	3.73945e-17	1	6.62449e-17	8.31678e-16	8.13681e-17	3.73857e-17	3.89233e-30	3.89233e-30	3.89233e-30	3.89238e-30	3.89239e-30	3.89287e-30	4.53119e-14	5.4672e-30	4.75311e-29	6.29049e-30	3.89233e-30	3.89232e-30	3.89232e-30	3.89236e-30	3.89238e-30	3.89285e-30	4.53118e-14	5.46718e-30	4.75309e-29	6.29048e-30	3.89232e-30	3.89232e-30	3.89236e-30	3.89238e-30	3.89285e-30	4.53118e-14	5.46717e-30	4.75309e-29	6.29048e-30	3.89232e-30	3.89236e-30	3.89238e-30	3.89285e-30	4.53118e-14	5.46717e-30	4.75309e-29
260		1.82006e-18	1.82006e-18	1.82006e-18	1.82006e-18	1.82006e-18	1.82006e-18	1.82009e-18	1	1.86773e-18	3.15965e-18	1.8996e-18	1.82006e-18	3.93574e-32	3.93574e-32	3.93574e-32	3.93575e-32	3.93575e-32	3.93582e-32	1.27122e-14	4.00773e-32	5.97956e-32	4.06129e-32	3.93574e-32	3.93574e-32	3.93574e-32	3.93575e-32	3.93575e-32	3.93581e-32	1.27122e-14	4.00773e-32	5.97955e-32	4.06129e-32	3.93574e-32	3.93574e-32	3.93575e-32	3.93575e-32	3.93581e-32	1.27122e-14	4.00772e-32	5.97954e-32	4.06129e-32	3.93574e-32	3.93575e-32	3.93575e-32	3.93581e-32	1.27122e-14	4.00772e-32	5.97954e-32
261		3.88122e-17	3.88122e-17	3.88122e-17	3.88122e-17	3.88122e-17	3.88122e-17	3.88129e-17	1	3.98288e-17	6.73786e-17	4.05083e-17	3.88122e-17	9.2319e-31	9.2319e-31	9.2319e-31	9.23195e-31	9.23196e-31	9.23241e-31	2.02002e-14	9.57685e-31	1.91557e-30	9.8671e-31	9.2319e-31	9.23189e-31	9.23189e-31	9.23194e-31	9.23195e-31	9.23239e-31	2.02001e-14	9.57681e-31	1.91555e-30	9.86708e-31	9.23189e-31	9.23189e-31	9.23193e-31	9.23195e-31	9.23238e-31	2.02001e-14	9.5768e-31	1.91555e-30	9.86708e-31	9.23189e-31	9.23193e-31	9.23195e-31	9.23238e-31	2.02001e-14	9.5768e-31	1.91555e-30
262		6.82182e-15	6.82182e-15	6.82181e-15	6.82181e-15	6.82184e-15	6.82186e-15	6.82221e-15	0.617519	0.00748489	0.238327	0.00770511	6.82181e-15	3.2148e-28	3.2148e-28	3.2148e-28	3.21482e-28	3.21483e-28	3.21504e-28	6.20002e-15	3.70944e-16	1.24107e-14	3.82045e-16	3.2148e-28	3.21479e-28	3.21479e-28	3.21481e-28	3.21482e-28	3.21503e-28	6.19999e-15	3.70941e-16	1.24106e-14	3.82044e-16	3.21479e-28	3.21479e-28	3.21481e-28	3.21482e-28	3.21503e-28	6.19998e-15	3.70941e-16	1.24105e-14	3.82043e-16	3.21479e-28	3.21481e-28	3.21482e-28	3.21503e-28	6.19998e-15	3.70941e-16	1.24105e-14
263		2.74884e-15	2.74884e-15	2.74884e-15	2.74884e-15	2.74885e-15	2.74886e-15	2.74898e-15	0.638156	2.93213e-14	0.260541	3.00773e-14	2.74884e-15	9.38322e-29	9.38322e-29	9.38322e-29	9.38327e-29	9.38327e-29	9.38362e-29	6.86203e-15	6.5485e-28	2.88484e-15	6.71287e-28	9.38322e-29	9.38321e-29	9.38321e-29	9.38325e-29	9.38326e-29	9.3836e-29	6.86202e-15	6.54849e-28	2.88483e-15	6.71286e-28	9.38321e-29	9.38321e-29	9.38325e-29	9.38326e-29	9.3836e-29	6.86202e-15	6.54849e-28	2.88482e-15	6.71285e-28	9.38321e-29	9.38325e-29	9.38326e-29	9.3836e-29	6.86202e-15	6.54849e-28	2.88482e-15
264		5.17768e-16	5.17768e-16	5.17768e-16	5.17768e-16	5.17768e-16	5.17768e-16	5.17772e-16	1	9.30261e-16	2.66097e-14	9.41966e-16	5.17768e-16	4.20608e-29	4.20608e-29	4.20608e-29	4.20608e-29	4.20608e-29	4.20611e-29	5.13395e-14	6.02692e-29	1.18927e-27	6.07861e-29	4.20608e-29	4.20608e-29	4.20608e-29	4.20608e-29	4.20608e-29	4.2061e-29	5.13395e-14	6.02692e-29	1.18927e-27	6.07861e-29	4.20608e-29	4.20608e-29	4.20608e-29	4.20608e-29	4.2061e-29	5.13394e-14	6.02692e-29	1.18927e-27	6.07861e-29	4.20608e-29	4.20608e-29	4.20608e-29	4.2061e-29	5.13394e-14	6.02692e-29	1.18927e-27
265		2.31949e-15	2.31949e-15	2.31949e-15	2.31949e-15	2.31949e-15	2.31949e-15	2.3195e-15	1.25467e-13	3.32124e-15	1	3.38218e-15	2.31949e-15	1.46865e-28	1.46865e-28	1.46865e-28	1.46865e-28	1.46865e-28	1.46866e-28	4.61169e-27	1.88869e-28	5.03021e-14	1.92169e-28	1.46865e-28	1.46865e-28	1.46865e-28	1.46865e-28	1.46865e-28	1.46865e-28	4.61169e-27	1.88869e-28	5.0302e-14	1.92169e-28	1.46865e-28	1.46865e-28	1.46865e-28	1.46865e-28	1.46865e-28	4.61168e-27	1.88869e-28	5.0302e-14	1.92169e-28	1.46865e-28	1.46865e-28	1.46865e-28	1.46865e-28	4.61168e-27	1.88869e-28	5.0302e-14
[truncated: 745 more columns]
