# Supplementary material
Source: publisher figshare collection journal article supplement (https://brill.figshare.com/articles/dataset/_/5545159)

BioGeoBEARS DIVALIKE on Psychotria M0\_unconstrained  
 ancstates: global optim, 4 areas max. d=0.001; e=0; j=0; LnL=-323.44

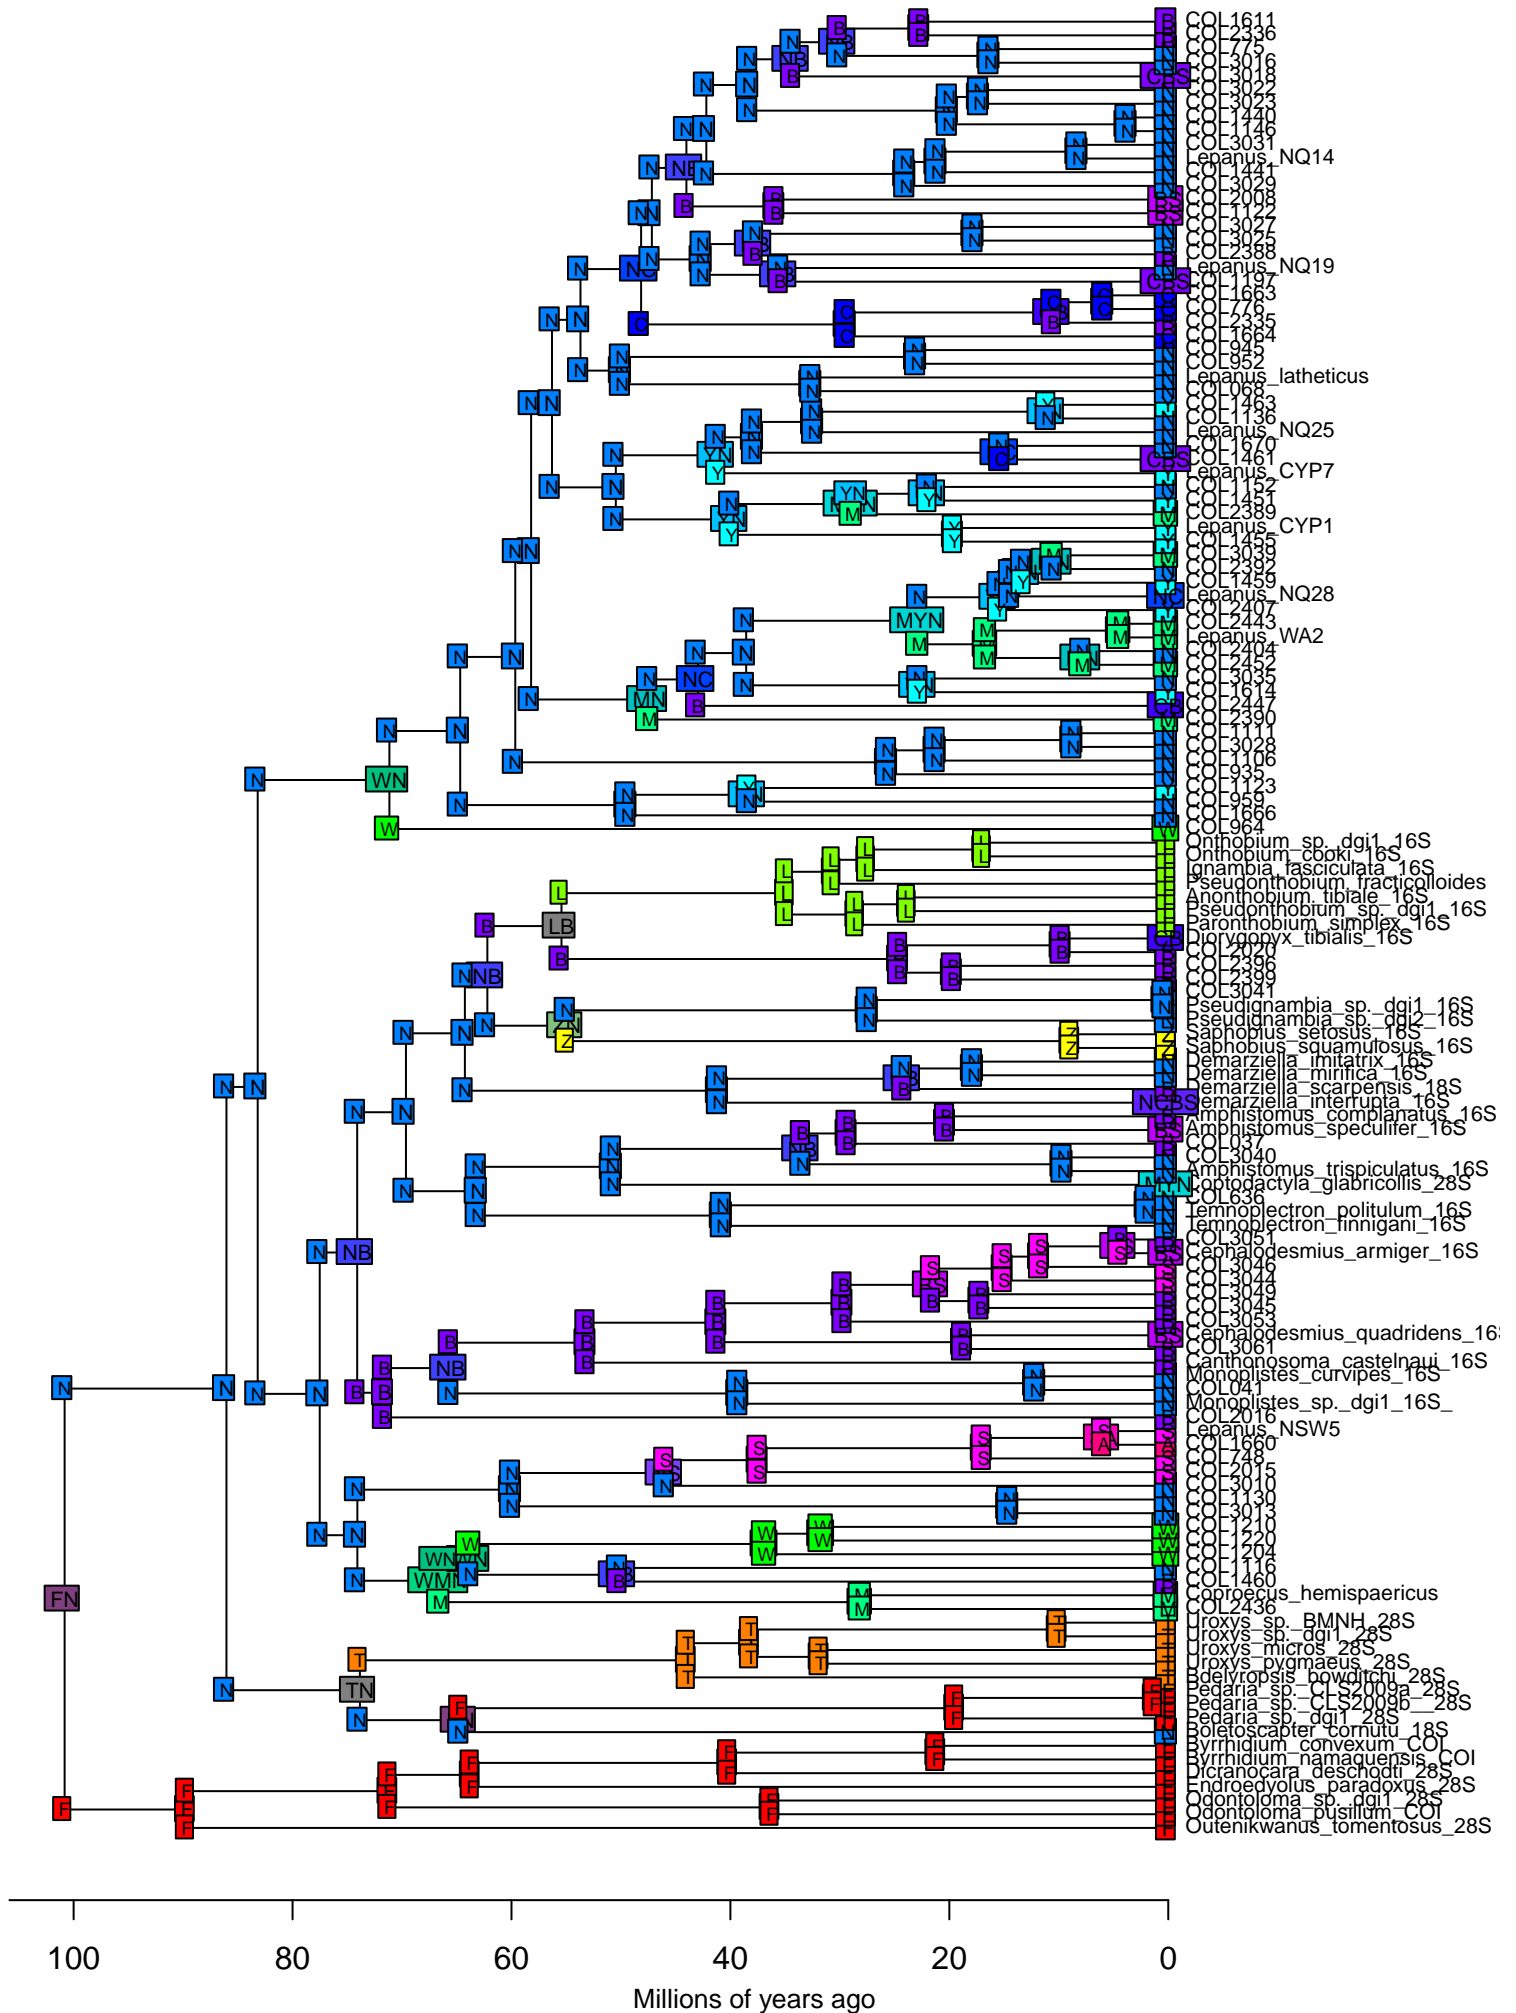

BioGeoBEARS DIVALIKE on Psychotria M0\_unconstrained  
 ancstates: global optim, 4 areas max. d=0.001; e=0; j=0; LnL=-323.44

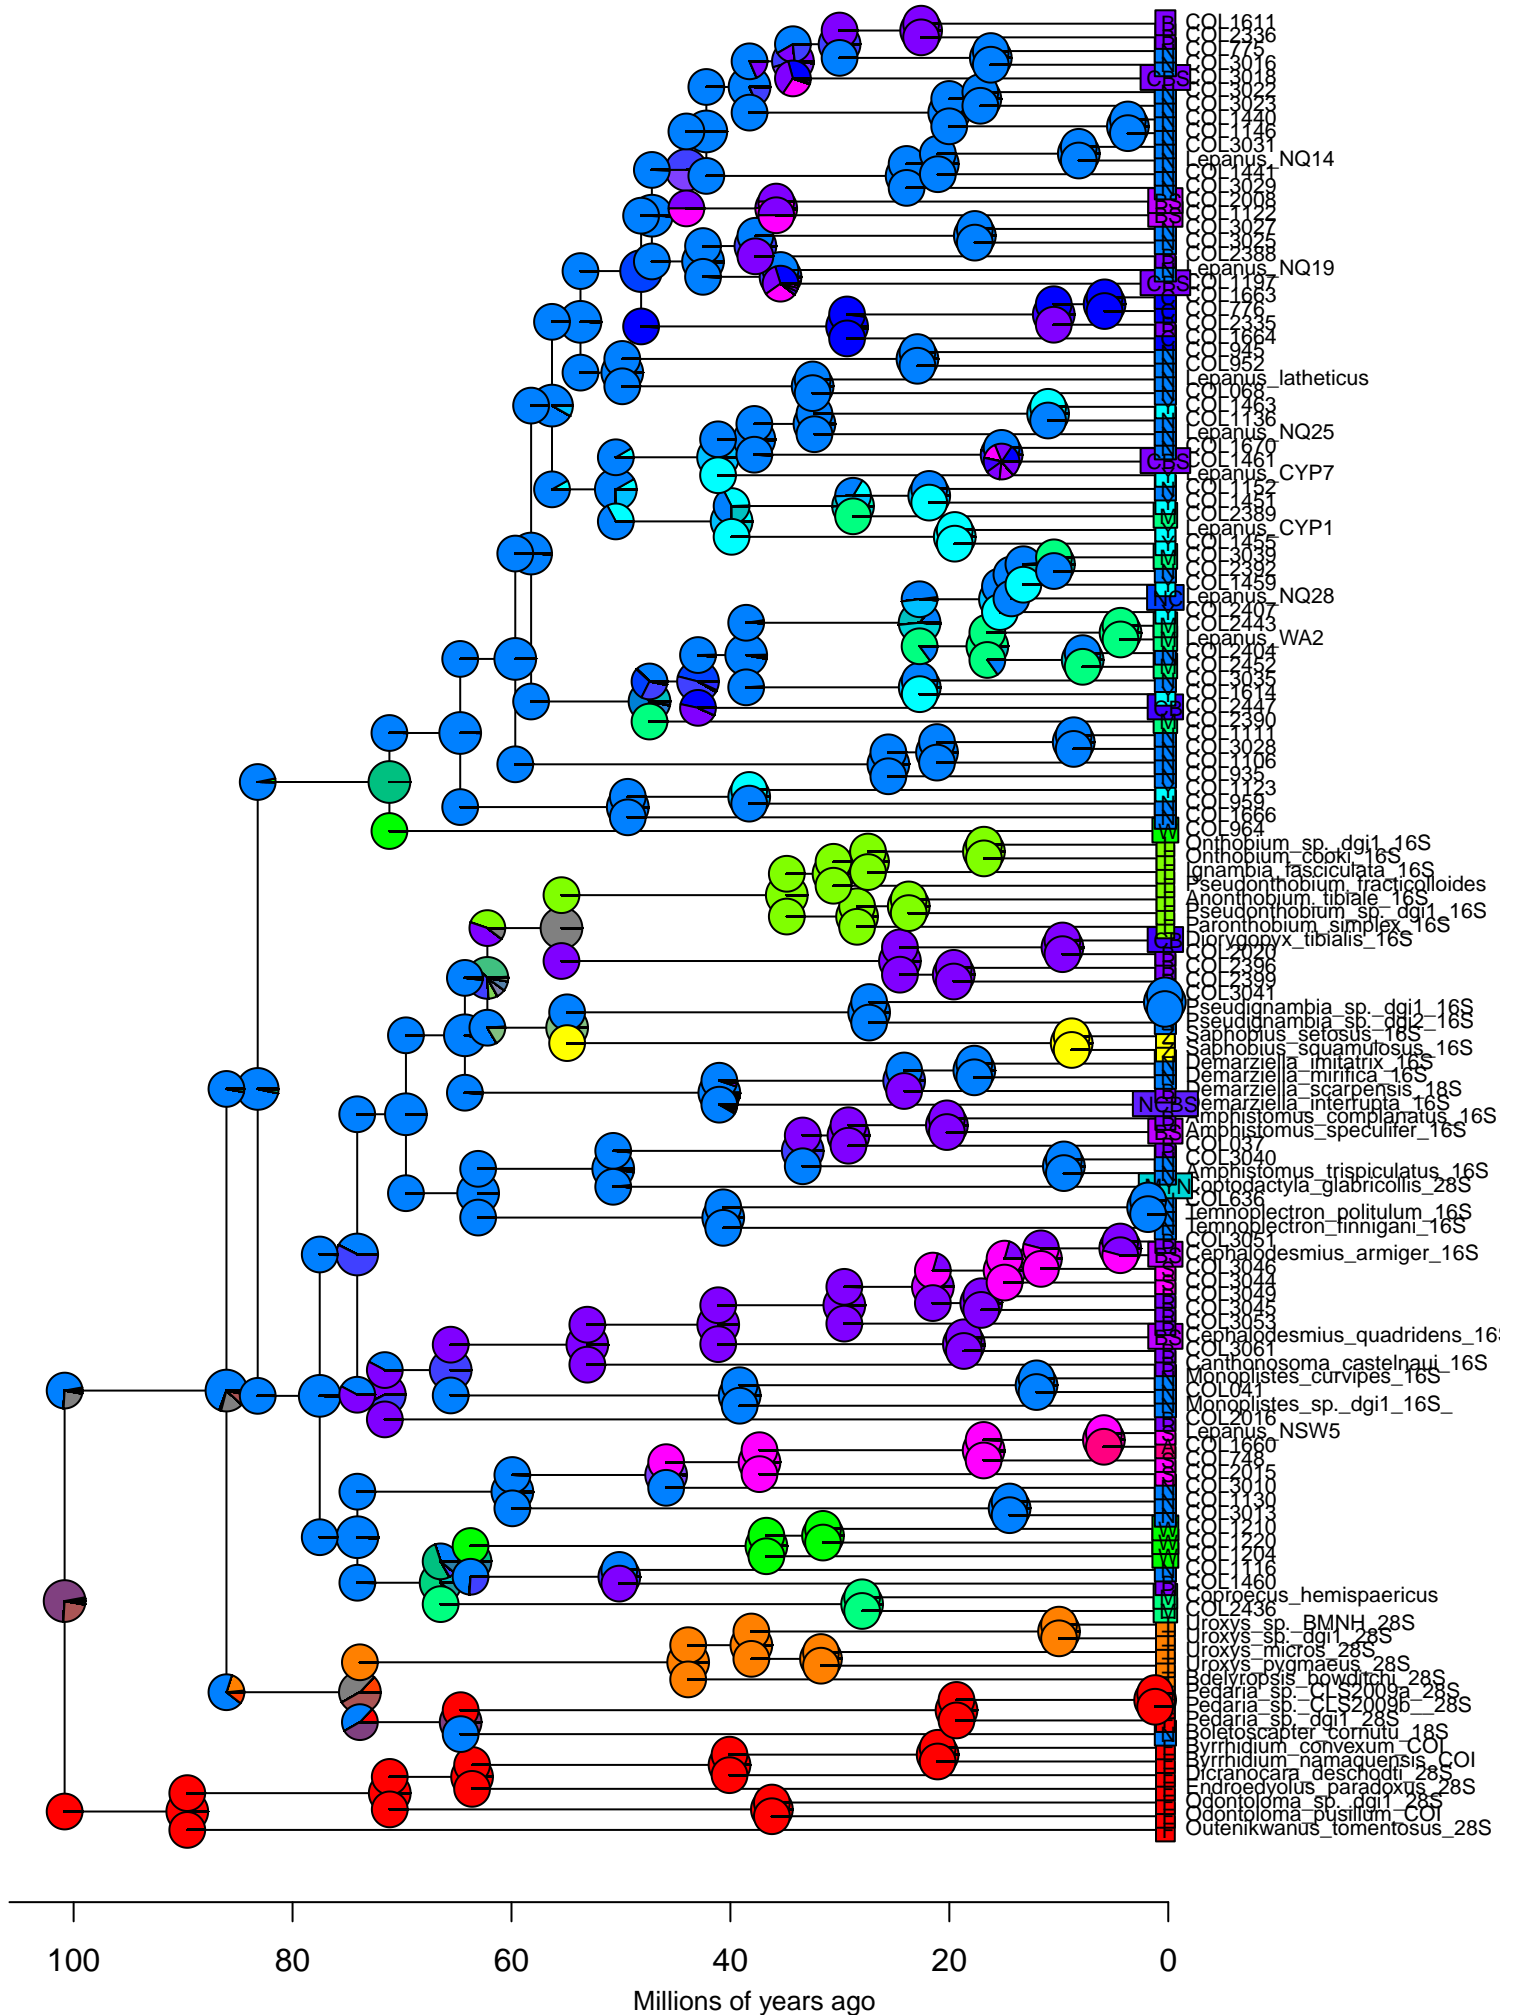

**BioGeoBEARS DIVALIKE+J on Psychotria M0\_unconstrained**  
 ancstates: global optim, 4 areas max. d=4e-04; e=0; j=0.017; LnL=-288.66

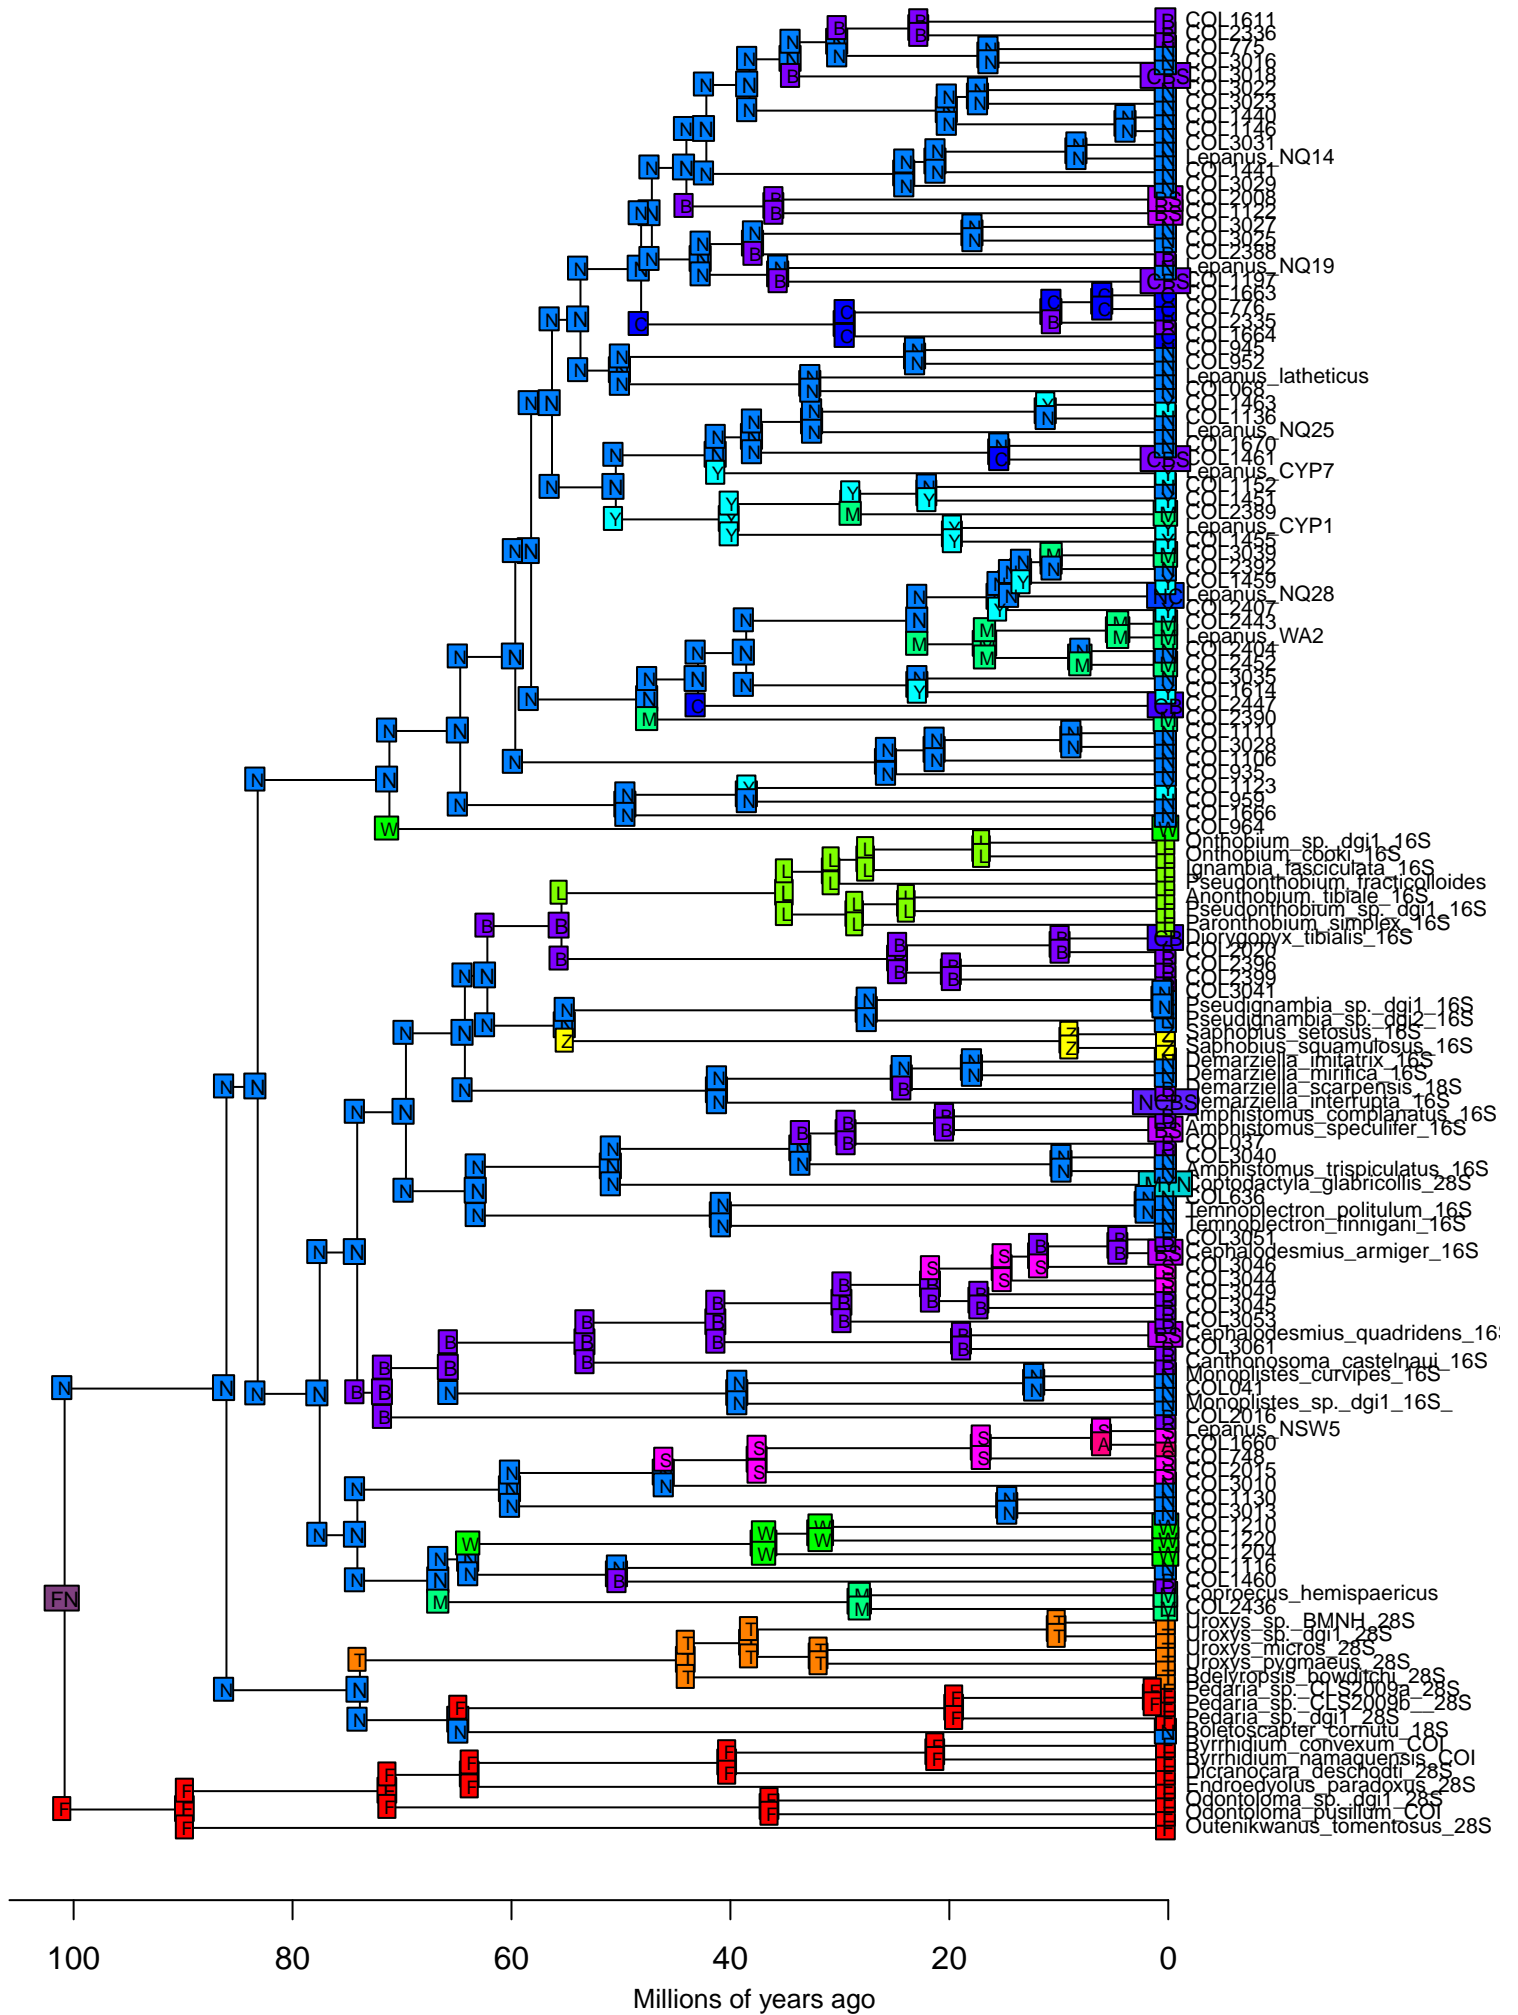

**BioGeoBEARS DIVALIKE+J on Psychotria M0\_unconstrained**  
 ancstates: global optim, 4 areas max. d=4e-04; e=0; j=0.017; LnL=-288.66

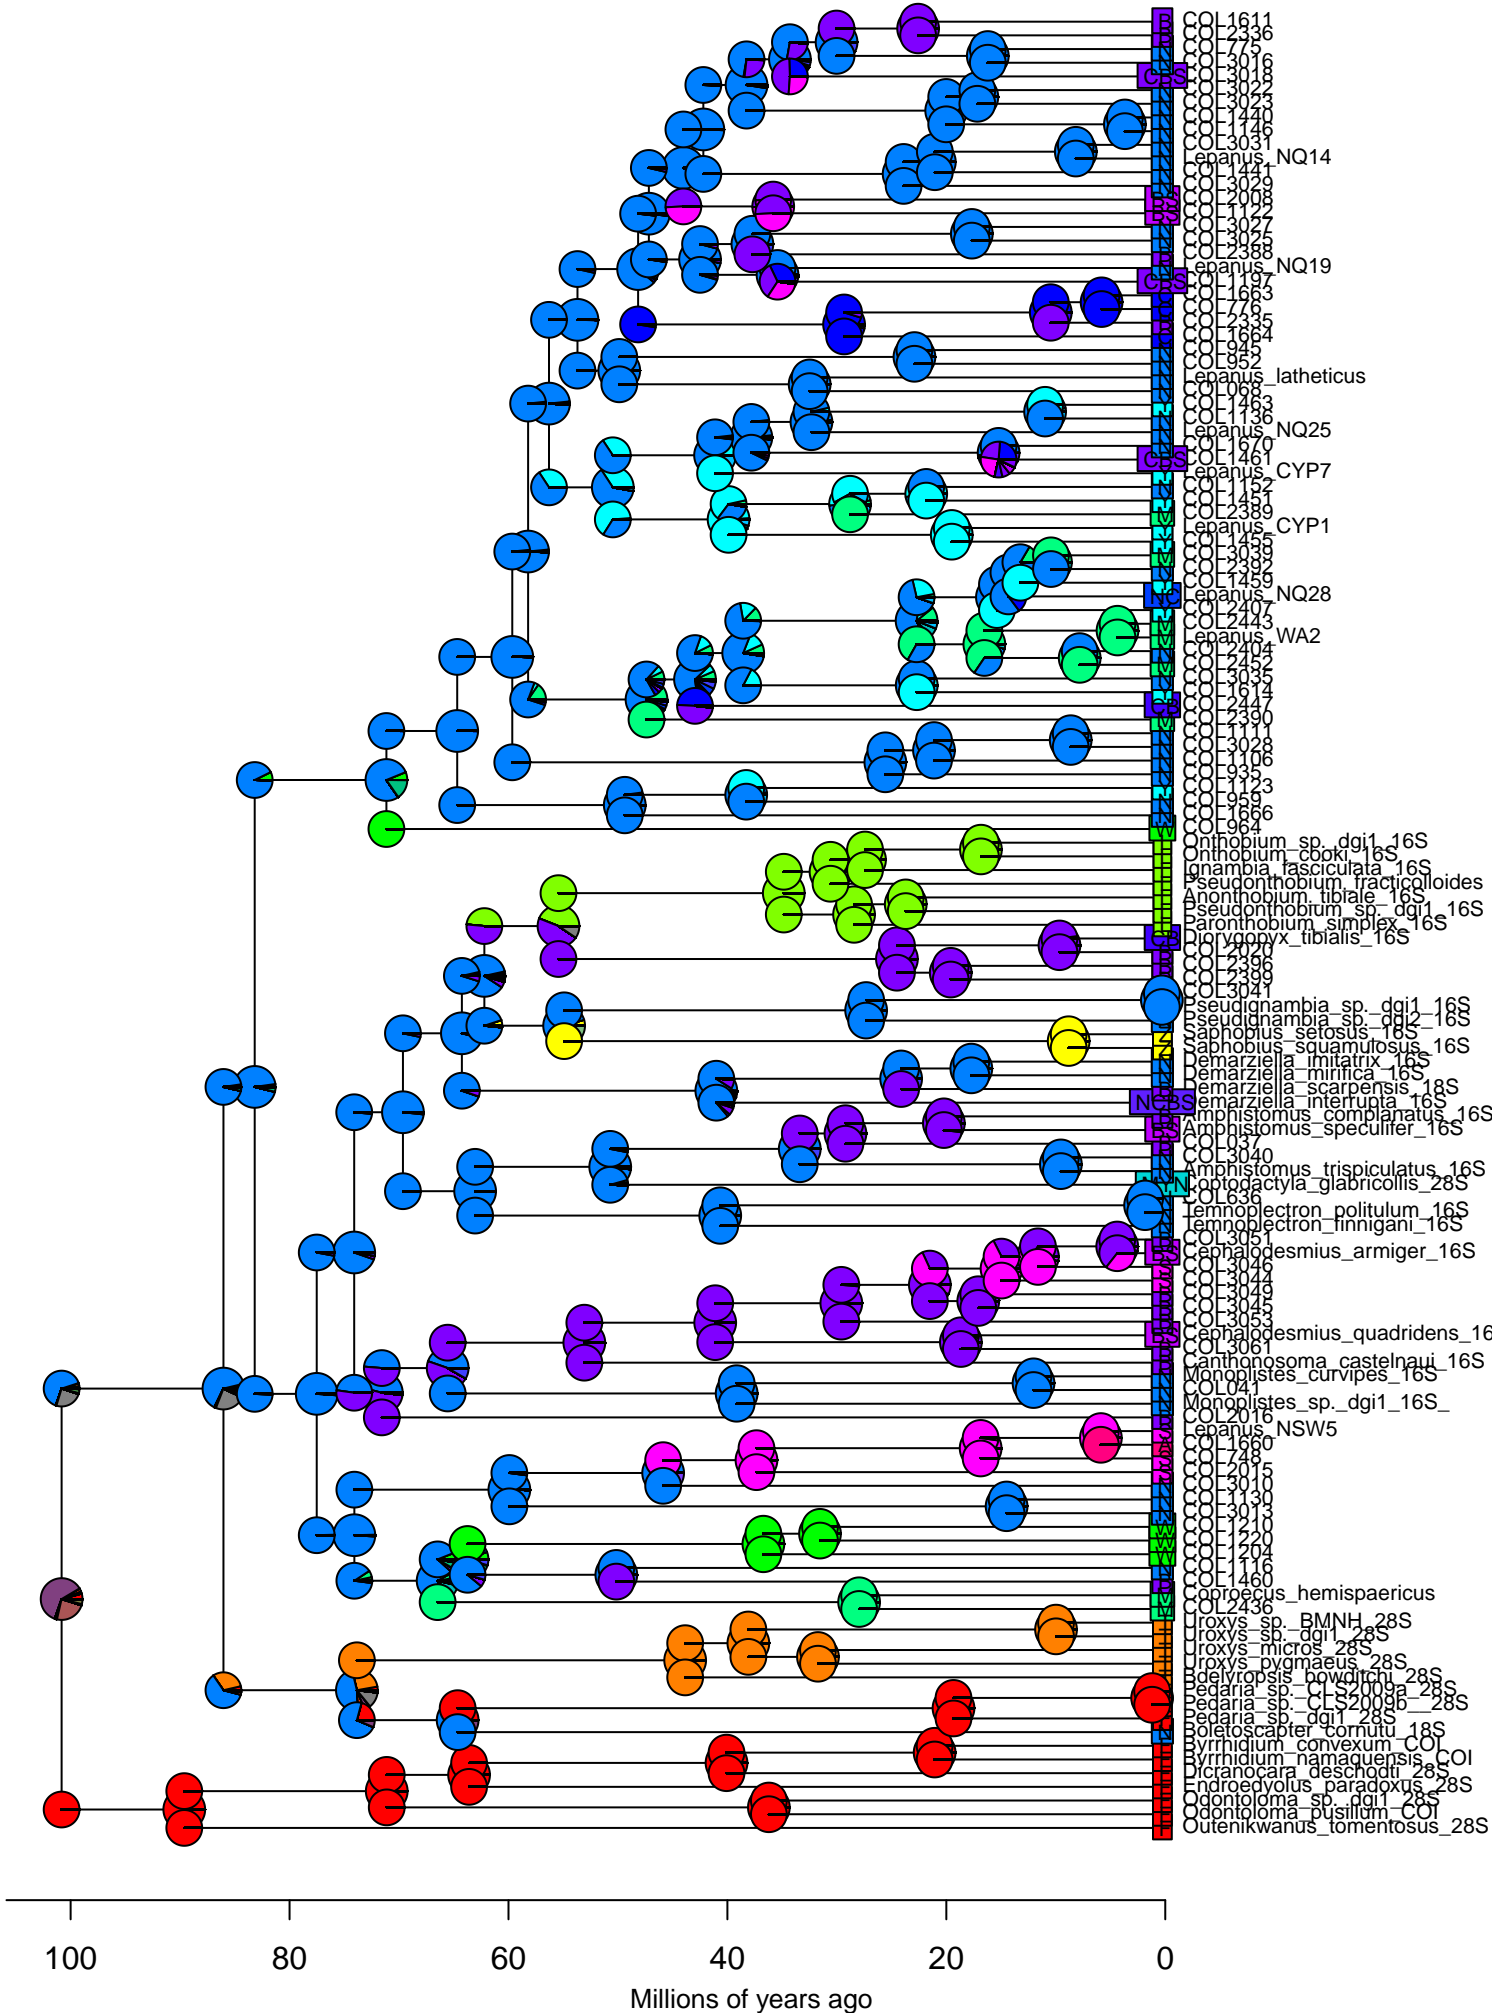

Supplement: Supplementary file 2 [file 1]
