# Supplementary material
Source: publisher figshare collection journal article supplement (https://brill.figshare.com/articles/dataset/_/5545159)

BioGeoBEARS DEC on Dungies M0\_unconstrained  
 ancstates: global optim, 4 areas max. d=8e-04; e=0.0014; j=0; LnL=-317.35

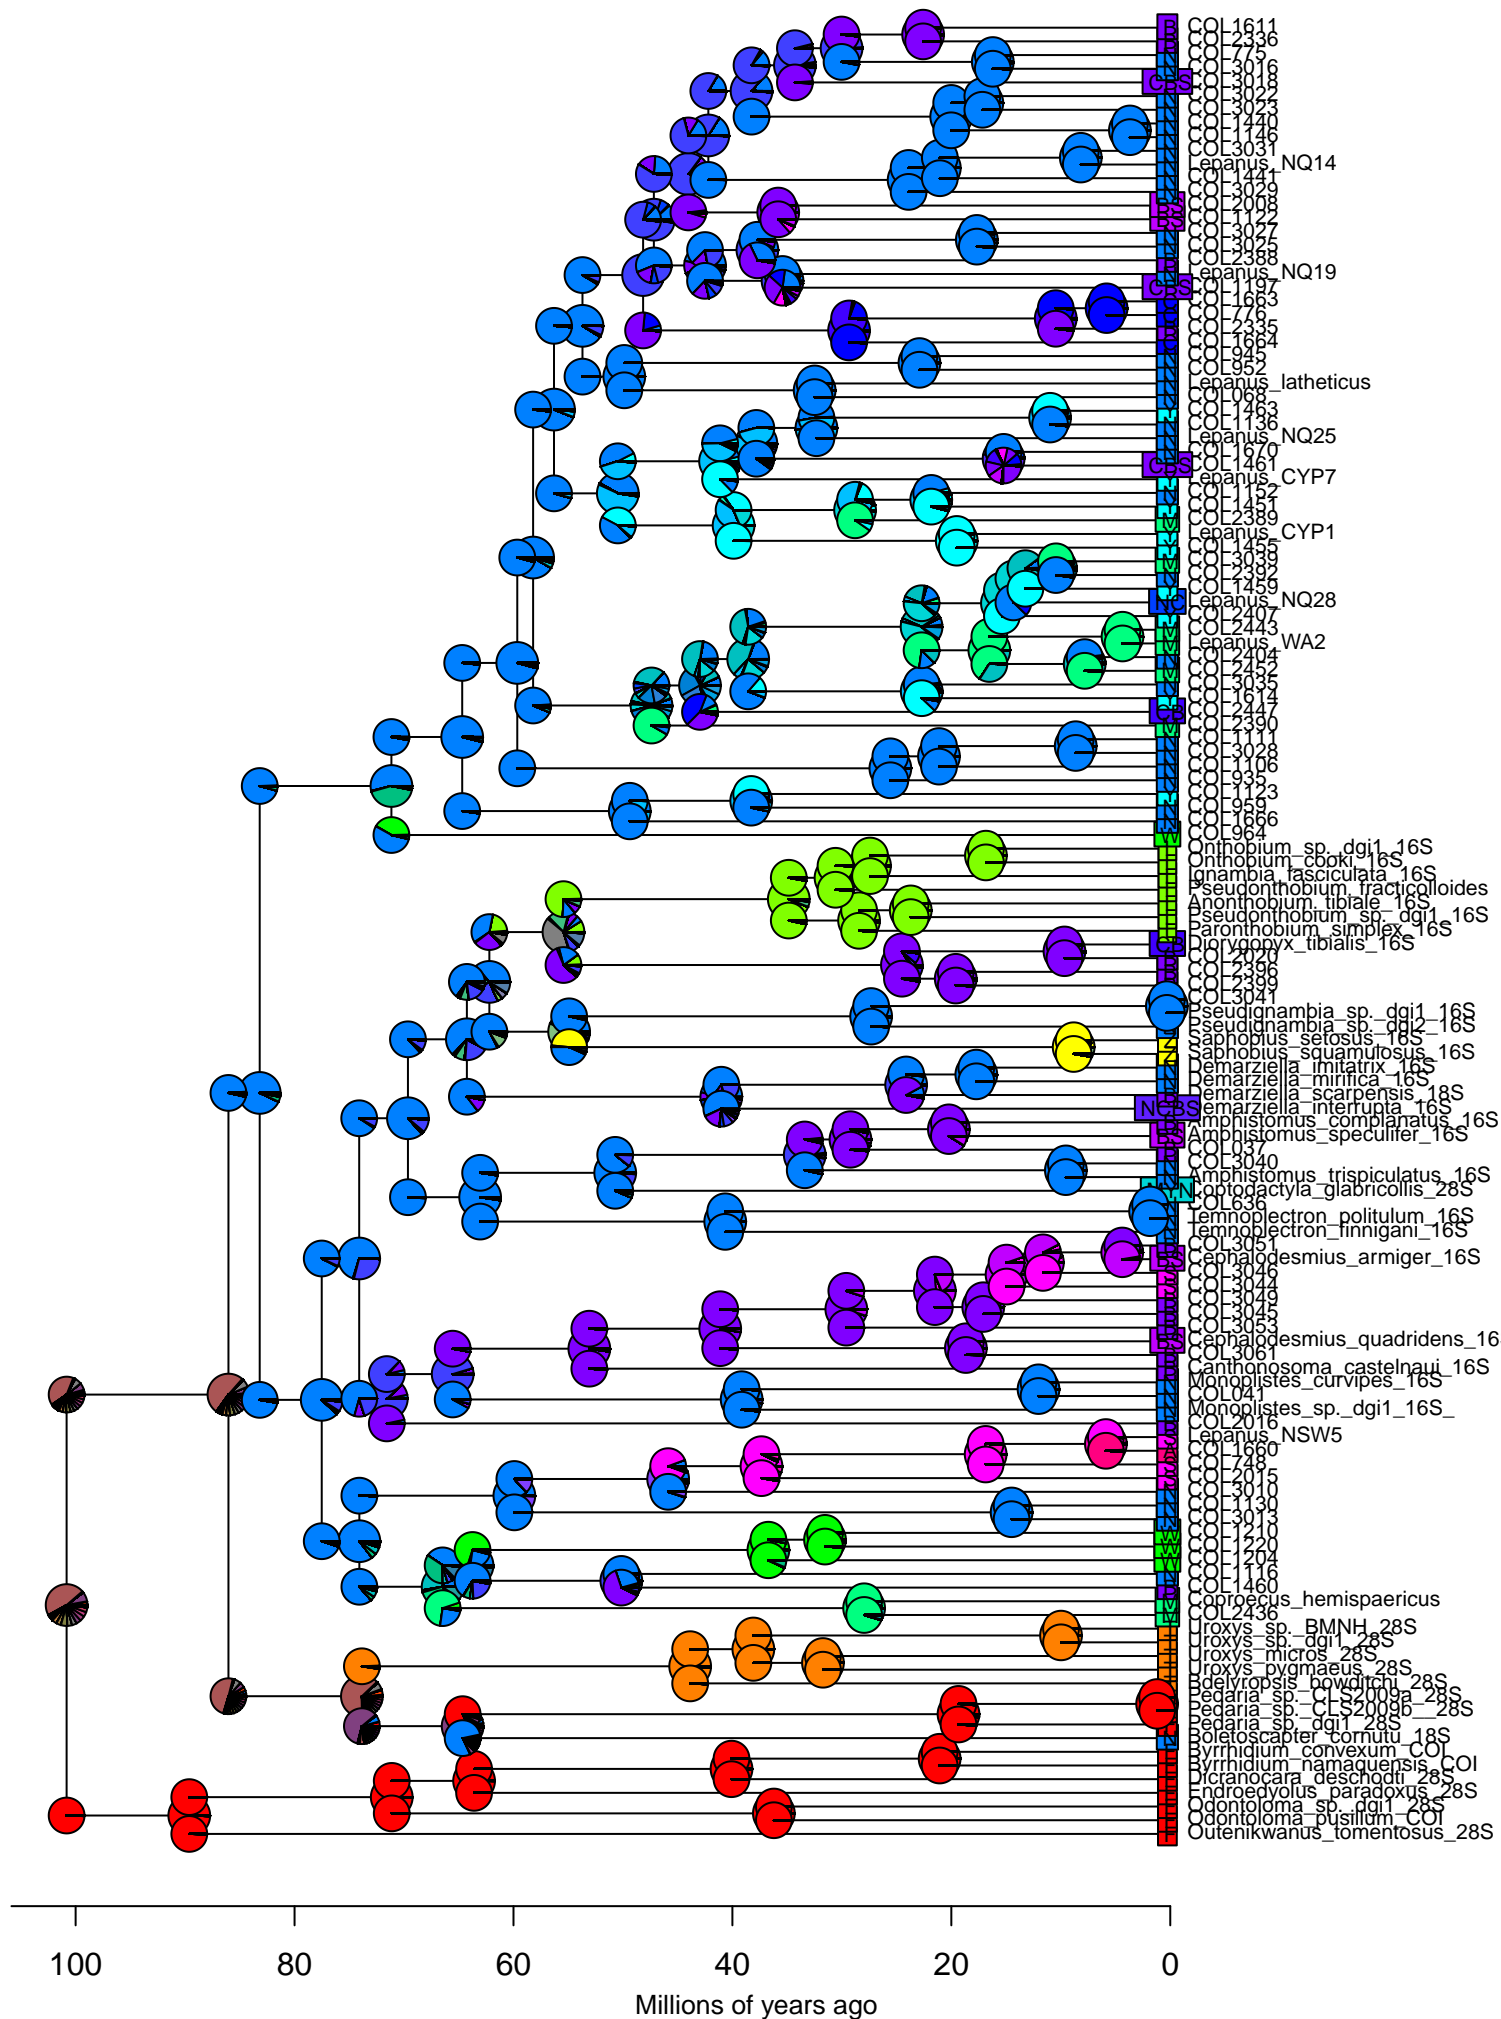

**BioGeoBEARS DEC+J on Dungiesb M0\_unconstrained**  
**ancstates: global optim, 4 areas max. d=4e-04; e=0; j=0.0173; LnL=-284.98**

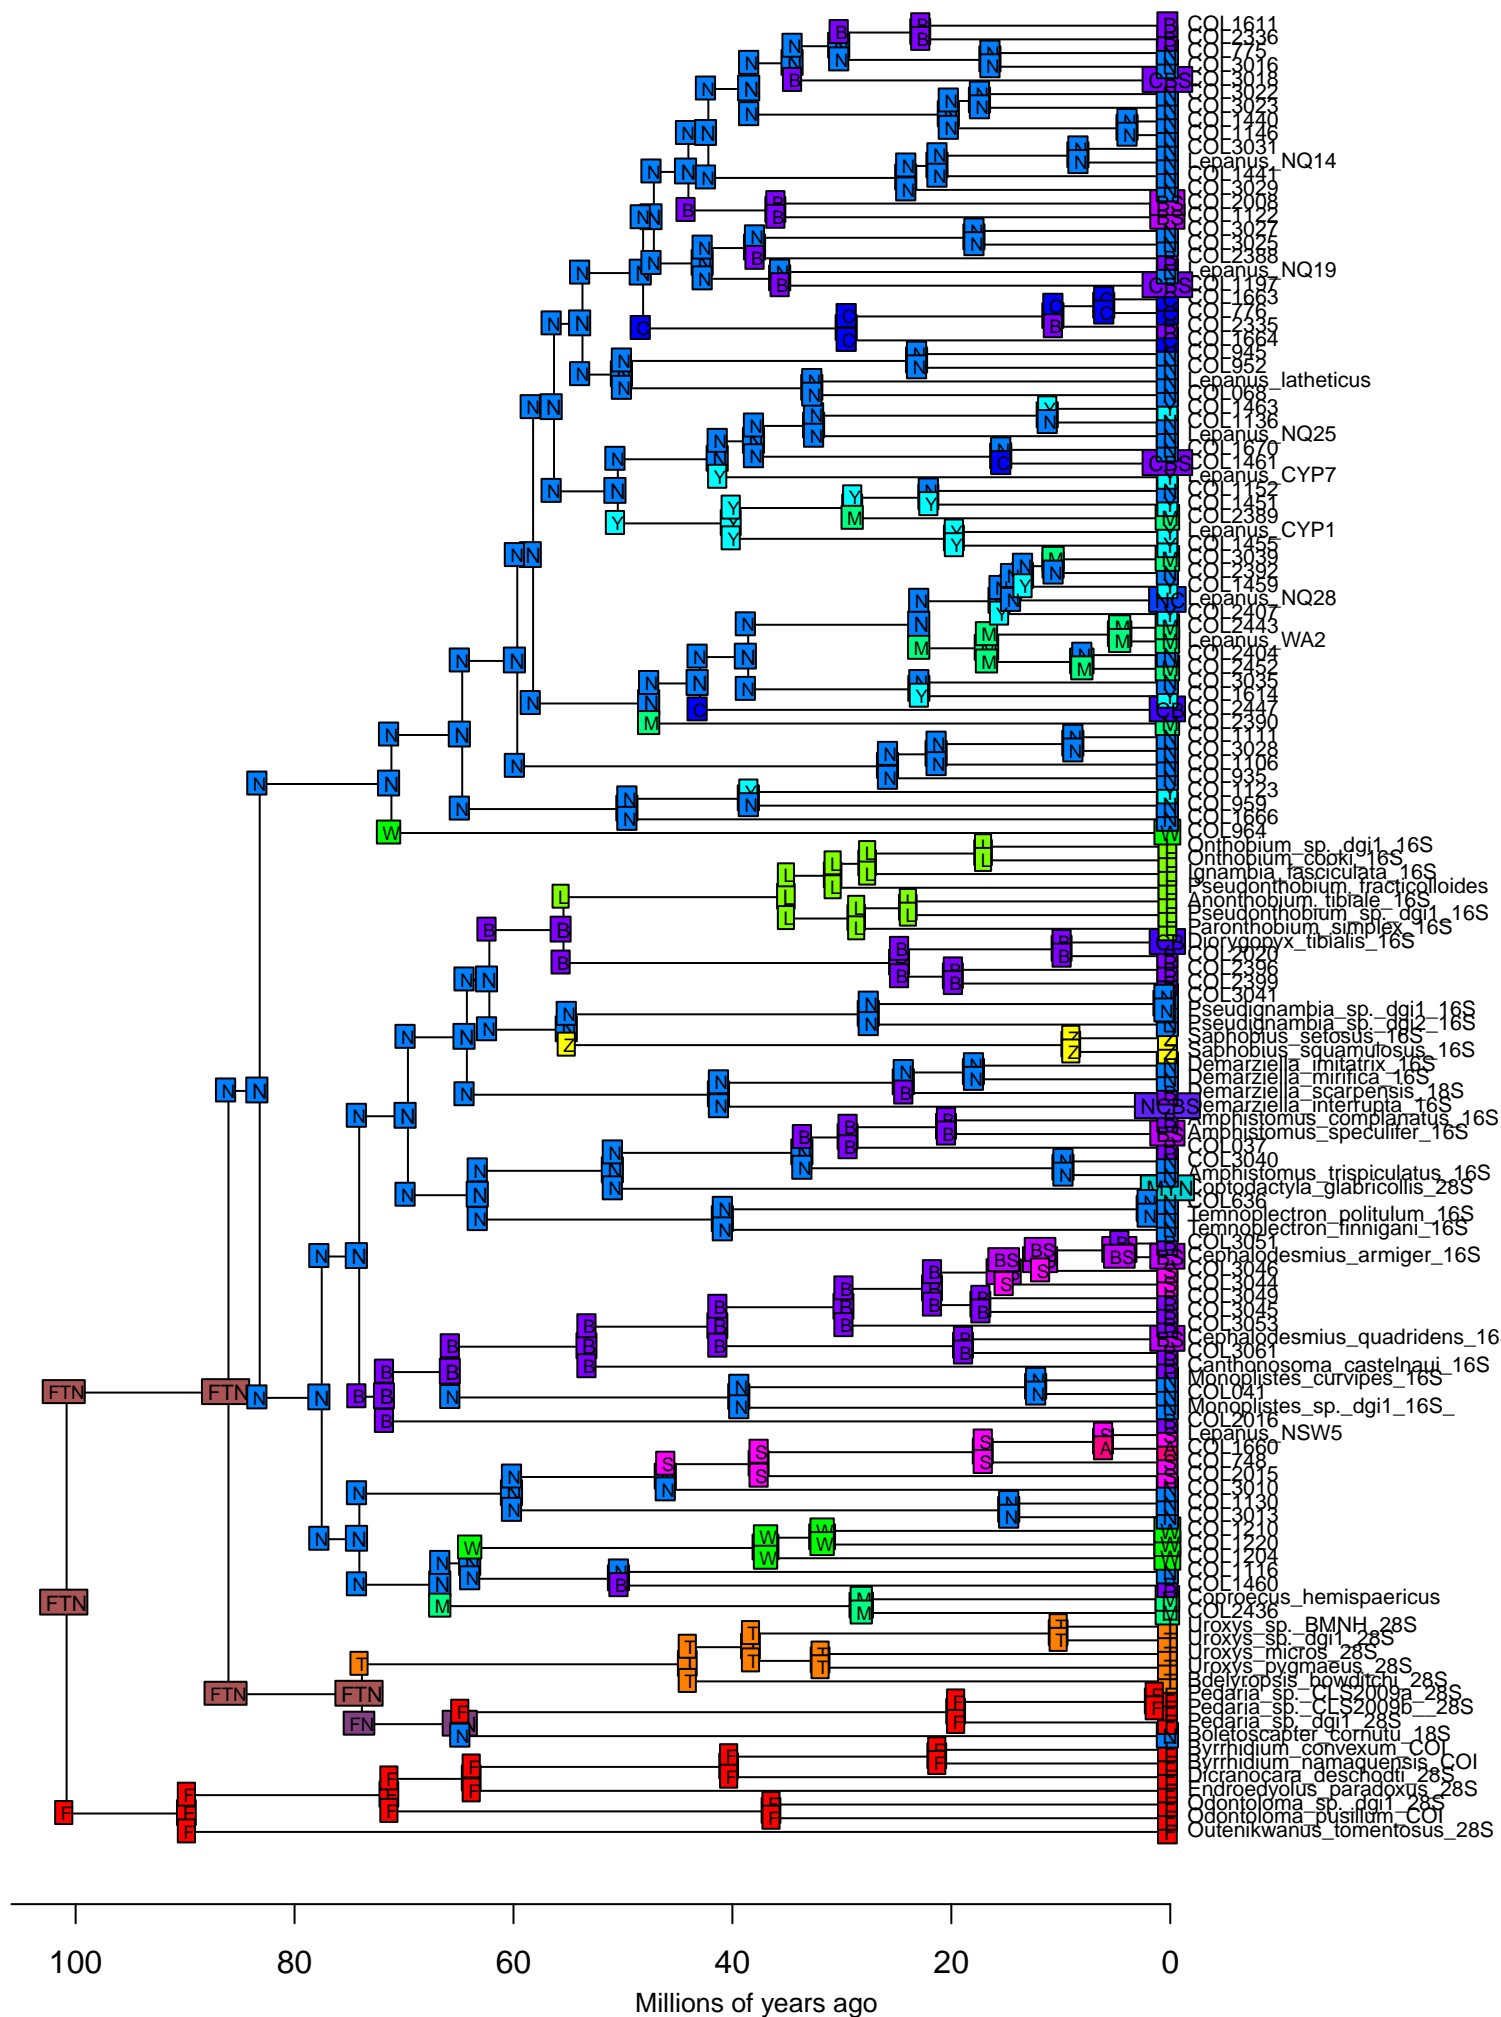

**BioGeoBEARS DEC+J on Dungiesb M0\_unconstrained**  
**ancstates: global optim, 4 areas max. d=4e-04; e=0; j=0.0173; LnL=-284.98**

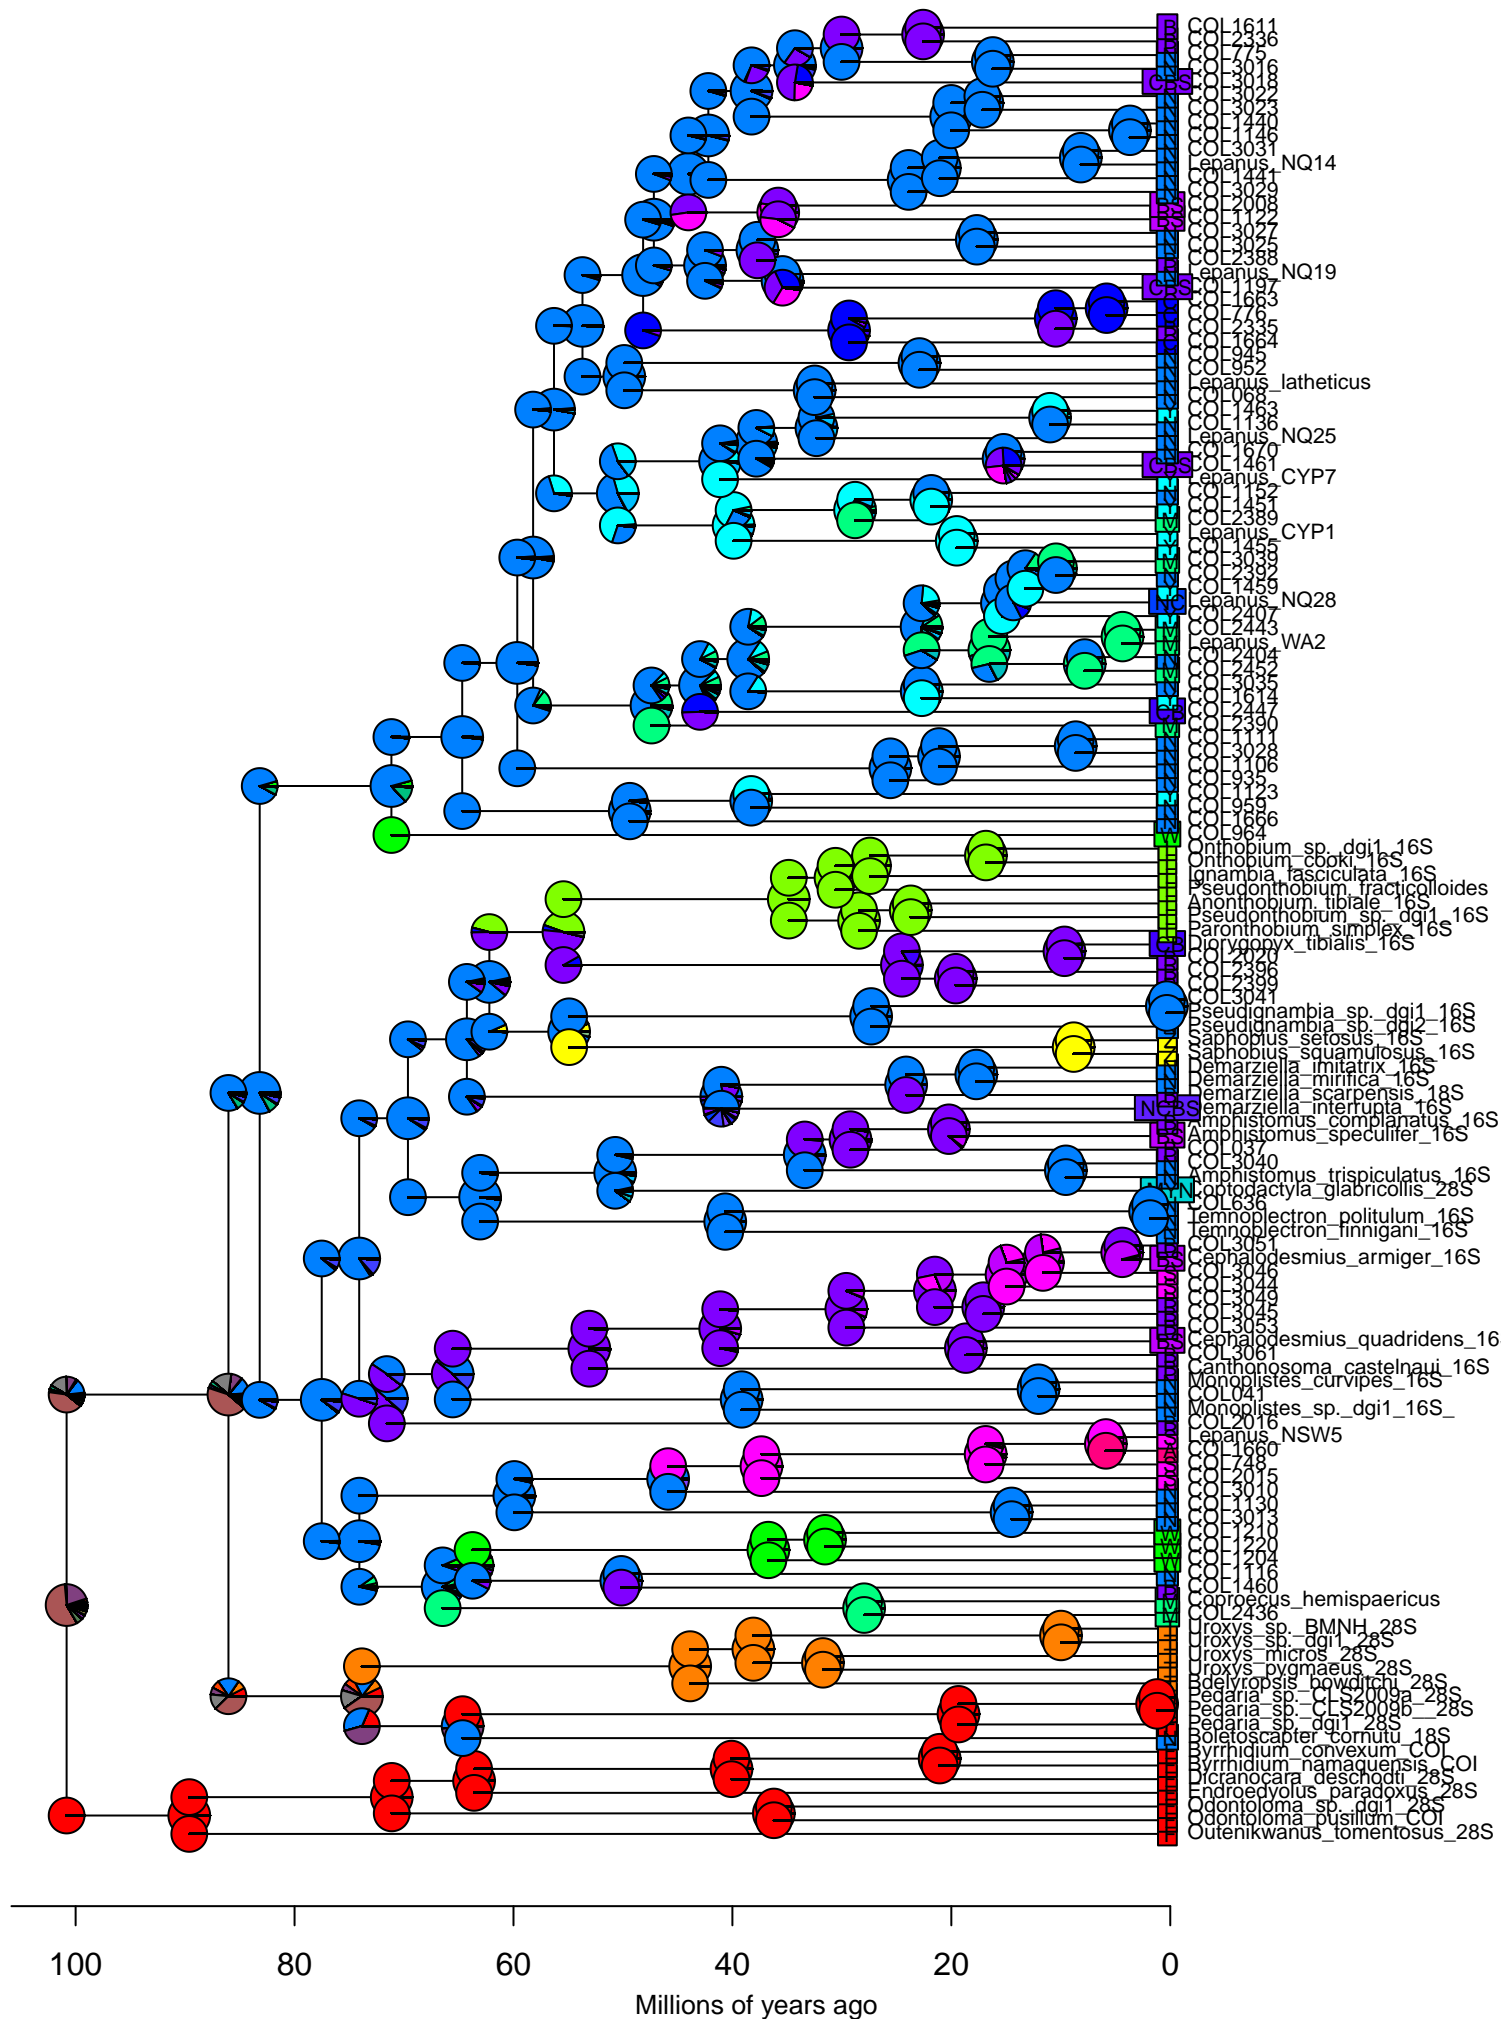

Supplement: Supplementary file 4 [file 1]
