# Supplementary material
Source: publisher figshare collection journal article supplement (https://brill.figshare.com/articles/dataset/_/5545159)

Major ecozones

- Deserts and xeric shrublands
- Grasslands, savannas and shrublands
- Mediterranean forest, woodland and scrub
- Broadleaf and mixed forest
- Moist broadleaf forest

Mesic zone forest type

- wet sclerophyll
- tropical/subtropical rainforest
- dry sclerophyll
- temperate rainforest

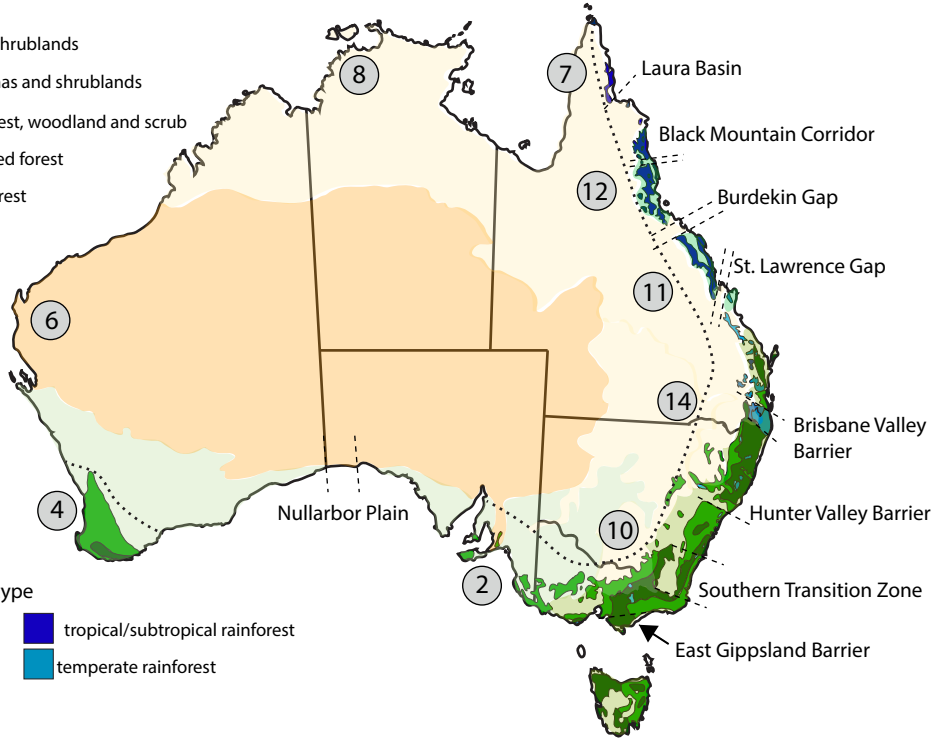

Supplement: Supplementary file 5 [file 1]
