# Supplementary material
Source: publisher figshare collection journal article supplement (https://brill.figshare.com/articles/dataset/_/5545159)
Supplement: Supplementary file 6 [file 2]

Appendix 1: Data points from *Atlas of Living Australia* and deemed erroneous identification or geocoding as data point is outside the known distributional range of the genera.

**Map B *Lepanus*:** points in central WA and on SA/NT border.

**Map C *Monoplistes*:** points on SA/NT border and southern inland Qld.

**Map D *Amphistomus*:** points on NT/SA border, inland just below the Gulf of Carpentaria, and westerly along Qld/NSW border

**Map E *Tesserodon*:** points W of Sydney; in centre of WA

**Map F *Temnoplectron*:** points near Adelaide, in centre of WA and in centre of NT

**Map G *Coptodactyla*:** points near Sydney and in inland Sth Qld

**Map H *Demarziella*:** points in New Caledonia

**Map I *Boletoscapter*:** points in middle of Coral Sea

**Map J *Aptenocanthon*:** point near Fraser Island, Qld

**Map L *Canthonosoma*:** Points near Darwin, in central Australia, in the Wet Tropics and in far western Qld

**Map M *Cephalodesmius*:** points in inland N Qld and far NQ, in central NSW and in the sea off Brisbane, Qld.

**Map N *Diorygopyx*:** Points near Cooktown, Mt Garnet and Mt Isa, Qld, Tasmania, New Caledonia

**Map O *Aulacopris*:** point on NT/SA border

**Map P *Thyregis*:** point of NT/SA border

**Map Q *Mentophilus*:** point near Townsville, Qld.
