# Supplementary material
Source: publisher figshare collection journal article supplement (https://brill.figshare.com/articles/dataset/_/5545159)
Supplement: Supplementary file 7 [file 2]

## Supplemental References

Aduse-Poku, K., Brattström, O., Kodandaramaiah, U., Lees, D. C., Brakefield, P.M. & Wahlberg, N. (2015) Systematics and Historical Biogeography of the Old World Butterfly Subtribe Mycalesina (Lepidoptera: Nymphalidae: Satyrinae). *BMC Evolutionary Biology* **15**: 167.

Australian Biomes. <http://dlb.sa.edu.au/rehsmoodle/course/view.php?id=214> (accessed 26 Feb 2017).

Condamine, F.L., Toussaint, E.F.A., Clamens, A., Genson, G., Sperling, F.A.H. & Kergoat, G.J. (2015) Deciphering the Evolution of Birdwing Butterflies 150 Years after Alfred Russel Wallace. *Scientific Reports* **5**:11860.

Chenoweth, L.B., & Schwarz, M.P. (2011) Biogeographical Origins and Diversification of the Exoneurine Allodapine Bees of Australia (Hymenoptera, Apidae). *The Journal of Biogeography* **38**: 1471–83.

Chenoweth, L. B., Tierney, S.M., Smith, J. A., Cooper, S. J. B., & M. P. Schwarz. 2007. Social Complexity in Bees Is Not Sufficient to Explain Lack of Reversions to Solitary Living over Long Time Scales. *BMC Evolutionary Biology* **7**: 246.

Foley, N.M., Thong, V.D., Soisook, P., Goodman, S.M., Armstrong, K.N., Jacobs, D.S., Puechmaille, S. J. & Teeling, E.C. (2015) How and Why Overcome the Impediments to Resolution: Lessons from Rhinolophid and Hipposiderid Bats. *Molecular Biology and Evolution* **32**: 313–33.

Fuller, S., Schwarz, M. & Tierney S. (2005) Phylogenetics of the Allodapine Bee Genus *Braunsapis*: Historical Biogeography and Long-Range Dispersal over Water. *The Journal of*

*Biogeography* **32**: 2135–44.

Heinicke, M.P., Daza, J. D., Greenbaum, E, Jackman, T. R., & A. M. Bauer. 2014. Phylogeny, Taxonomy and Biogeography of a Circum-Indian Ocean Clade of Leaf-Toed Geckos (Reptilia: Gekkota), with a Description of Two New Genera. *Systematics and Biodiversity*, 12 (1), 23–42.

Lee, T.R.C., Cameron, S.L., Evans, T.A., Ho, S.Y.W & Lo, N. (2015) The Origins and Radiation of Australian Coptotermes Termites: From Rainforest to Desert Dwellers. *Molecular Phylogenetics and Evolution* **82**: 234–44.

Rowe, K.C., Reno, M.L., Richmond, D.M., Adkins, R.M. & Stepan, S.J. (2008) Pliocene Colonization and Adaptive Radiations in Australia and New Guinea (Sahul), Multilocus Systematics of the Old Endemic Rodents (Muroidea: Murinae). *Molecular Phylogenetics and Evolution* **47**: 84–101.

Schwarz, M.P., Fuller, S., Tierney, S.M. & Cooper, S.J.B. (2006) Molecular Phylogenetics of the Exoneurine Allodapine Bees Reveal an Ancient and Puzzling Dispersal from Africa to Australia. *Systematic Biology* **55**: 31–45.

Steve Parish Nature Connect. Australian Forests – an introduction. <https://www.steveparish-natureconnect.com.au/nature-centre/sclerophyll-forests-introduction/> (accessed 26 Feb 2017)

Teeling, E.C., Springer, M.S., Madsen, O., Bates, P., O'brien, S. J. & Murphy, W.J. (2005) A Molecular Phylogeny for Bats Illuminates Biogeography and the Fossil Record. *Science* **307**: 580–84.

Wu, L.W., Yen S.H., Lees, D.C., Lu, C.C., Yang, P.S. & Hsu, Y.F. (2015) Phylogeny and Historical Biogeography of Asian *Pterourus* Butterflies (Lepidoptera: Papilionidae), A Case of Intercontinental Dispersal from North America to East Asia. *PloS One* **10** (10): e0140933.
